# Supplementary material for: UL34 Deletion Restricts Human Cytomegalovirus Capsid Formation and Maturation
Source: Int J Mol Sci. 2022 May 21;23(10):5773. doi: 10.3390/ijms23105773 (PMC9143689; doi:10.3390/ijms23105773)
Supplement: Supplementary file 1 [file ijms-23-05773-s001.zip › Supplementary File S1.xlsx]

## Sheet: WT_vs_dUL54
ID	WT1	WT2	WT3	WT4	WT5	dUL54_1	dUL54_2	dUL54_3	padj	log2FoldChange	pvalue	stat	foldChange	log10padj
HCMVUL86	41131.7	50980.7	49933.8	47273.8	47842.4	326.017	327.356	351.01	2.44053e-15	-7.14276	4.04596e-19	-95.5543	0.00707642	14.6125
HCMVUL85	19953.2	26287.7	25714.1	22619.4	25039.7	188.687	219.79	187.576	3.59383e-14	-6.90988	1.04264e-16	-60.9397	0.00831609	13.4444
HCMVTRL10	7149.68	8299.02	8471.4	7393.1	7662.81	92.8459	87.8633	75.0497	1.05668e-13	-6.52003	4.70727e-16	-53.9242	0.0108962	12.9761
HCMVUL67	45231.5	53688.9	51554.2	42935.5	56272	667.878	664.469	588.092	7.22558e-15	-6.28028	7.78618e-18	-75.2037	0.0128661	14.1411
HCMVUL66	39001.4	45640.9	42505.5	37436.6	44175.9	665.72	574.751	585.084	4.62544e-15	-6.09895	2.08472e-18	-83.675	0.0145892	14.3348
HCMVUL82	99714.5	144014	133783	130354	138799	1960.09	1832.67	1852.8	7.68832e-15	-6.09153	9.55942e-18	-73.9639	0.0146644	14.1142
HCMVUL83	93005.2	128501	123588	118210	121053	1797.75	1656.55	1839.03	6.55287e-15	-6.04199	5.97493e-18	-76.8344	0.0151768	14.1836
HCMVUL64	39955.8	53673.4	44432.9	39902.5	50102.7	793.728	741.637	607.837	6.26685e-14	-5.99593	2.3376e-16	-57.0762	0.0156691	13.203
HCMVUL65	22572.4	28737.4	22686.2	22642	28368.4	455.463	395.978	338.479	1.26257e-13	-5.97866	5.899e-16	-52.9452	0.0158579	12.8987
HCMVUL10	5287.96	6303.23	5941.99	5378.78	5677.66	107.842	103.01	93.5694	1.48453e-13	-5.8154	7.31039e-16	-52.0311	0.0177578	12.8284
HCMVUL100	31367	41146	40981	37549.4	42106.7	864.385	732.908	729.75	2.64623e-14	-5.63459	7.10093e-17	-62.8679	0.0201288	13.5774
HCMVUL68	31783.2	37877.5	33839.8	31510.8	39055	827.319	678.955	607.216	5.65204e-14	-5.63263	2.06142e-16	-57.6615	0.0201563	13.2478
HCMVUL63	42401	49632.5	47674.8	40303.4	50774.4	1143.41	1073.41	999.854	7.65641e-15	-5.42418	8.88509e-18	-74.4036	0.0232895	14.116
HCMVUL61	27066.4	38854.2	31993.4	26508	29966.9	964.602	633.433	624.559	5.53039e-12	-5.39786	4.53837e-14	-37.189	0.0237182	11.2572
HCMVUL84	72525.5	92659.9	91585.8	81044.1	88498.3	2161.66	1996.15	2051.39	5.01142e-15	-5.35923	3.32322e-18	-80.5738	0.0243619	14.3
HCMVUL76	5830.58	7127.78	7042.35	6774.53	7135.29	167.177	174.217	162.361	1.48707e-13	-5.33422	7.51918e-16	-51.9122	0.0247879	12.8277
HCMVUL62	48967.3	61506.6	53015.7	48798.1	59275	1558.18	1361.02	1160.27	9.85139e-14	-5.3236	4.16463e-16	-54.4629	0.0249711	13.0065
HCMVUL88	11398.6	14170.5	13671.1	13276.7	13719.6	346.689	312.776	348.528	2.13957e-14	-5.29911	4.71209e-17	-64.9935	0.0253985	13.6697
HCMVUL9	1885.29	2062.78	2097.12	1760.18	1948.69	72.754	56.803	49.2458	1.4004e-11	-5.0456	1.24207e-13	-34.2563	0.0302777	10.8537
HCMVUL109	4157.87	5001.9	4376.77	3267.31	3788.67	149.289	121.462	109.113	4.25539e-10	-5.02585	5.43212e-12	-25.1346	0.030695	9.37106
HCMVUL32	26844.5	33347.7	33578.4	31917	32637.3	998.127	1038.32	1033.21	6.55287e-15	-4.94726	5.27271e-18	-77.6166	0.0324135	14.1836
HCMVUL108	5682.42	6343.48	5926.18	4504.71	5068.4	218.635	187.396	139.63	6.83251e-11	-4.93202	7.19271e-13	-29.6735	0.0327578	10.1654
HCMVUL87	22726.6	26359.4	27045.2	25939.7	26950.9	865.135	833.86	865.049	4.12749e-15	-4.91355	1.36853e-18	-86.5763	0.0331799	14.3843
HCMVUL53	21504.5	24934.1	24454.7	23887.5	25549.9	813.656	809.462	773.491	4.12749e-15	-4.91036	1.12848e-18	-87.9391	0.0332533	14.3843
HCMVUL46	5984.81	7149.84	6684.14	6455.36	6604.15	233.625	247.363	239.482	2.64623e-14	-4.77232	7.23853e-17	-62.7701	0.0365921	13.5774
HCMVUL25	39541.9	51061.7	50111.4	45703.2	49355	1773.36	1721.09	1712.02	8.31798e-15	-4.75807	1.20612e-17	-72.5837	0.0369553	14.08
HCMVUL7	3230.91	3989.57	3706.8	3452.17	3837.51	135.627	137.179	131.117	1.37461e-12	-4.75469	9.5712e-15	-42.2152	0.037042	11.8618
HCMVTRL14	33163.6	35494.2	35270.8	31595.9	34354.7	1271.35	1271.88	1238.58	1.76567e-15	-4.75117	1.46359e-19	-103.752	0.0371325	14.7531
HCMVUL110	5105.08	5209.76	4937.32	3732.31	4087.93	212.906	168.267	136.627	2.5814e-10	-4.75077	3.05985e-12	-26.3498	0.0371428	9.58814
HCMVUL89	22125.8	26563	25920.2	24748.2	25392.5	899.464	930.823	965.601	4.62544e-15	-4.74004	2.30045e-18	-83.0104	0.0374201	14.3348
HCMVUL107	4597.23	4995.05	4588.96	3690.83	4097.51	185.735	160.344	149.767	1.59496e-11	-4.72989	1.46751e-13	-33.7929	0.0376844	10.7973
HCMVUL77	10828.3	12986.4	13419.5	12618.2	13335.7	463.906	498.038	479.516	2.45942e-14	-4.71268	6.11593e-17	-63.6338	0.0381365	13.6092
HCMVUL92	4029.14	4586.7	4645.2	4514.32	4757.1	177.888	172.227	164.739	1.05668e-13	-4.71219	4.67685e-16	-53.9525	0.0381496	12.9761
HCMVUL104	10305	12484.5	13100.9	11916.9	12539.5	478.872	523.043	480.645	4.35535e-14	-4.60676	1.40798e-16	-59.4727	0.0410417	13.361
HCMVUL75	40696.5	48491.1	44857.3	46447.3	45881.1	2218.84	1821.32	1798.77	4.31074e-14	-4.54425	1.32209e-16	-59.7772	0.0428592	13.3654
HCMVUL91	2439.18	2993.32	2743.48	2669.13	2669.86	117.101	129.333	106.68	2.33163e-12	-4.52437	1.75877e-14	-40.1752	0.043454	11.6323
HCMVUL103	6047.06	7033.06	7543.79	6736.5	7233.57	304.374	290.854	316.626	1.11012e-13	-4.50613	5.06104e-16	-53.6079	0.0440069	12.9546
HCMVUL93	13587.4	15931	16411.7	16083.6	17123.2	719.95	672.235	715.392	1.9895e-14	-4.48958	3.9579e-17	-65.9191	0.0445147	13.7013
HCMVUL122	20426.3	26155.7	24262.4	22708.6	24100.5	1136.07	1057.36	1002.59	2.13957e-14	-4.4619	5.01445e-17	-64.6666	0.0453769	13.6697
HCMVIRL14	29971.4	36007.7	38157.4	33121.7	36723.3	1655.33	1616.17	1652.71	9.88858e-15	-4.40072	1.67859e-17	-70.6652	0.0473425	14.0049
HCMVUS36	825.71	978.02	1042.13	977.33	1105.81	44.8731	49.5144	46.8014	3.43571e-10	-4.38563	4.24338e-12	-25.6507	0.0478404	9.46398
HCMVUL52	23389.8	27767	27015.6	25519.4	26756.1	1291.36	1319.36	1197.86	6.55287e-15	-4.35931	5.77969e-18	-77.0414	0.0487211	14.1836
HCMVUL47	9414.12	10344	10417.5	10309.9	10211.4	502.494	544.838	544.712	5.01142e-15	-4.25635	3.10285e-18	-81.0228	0.0523253	14.3
HCMVUL31	42778	53906.5	55876.8	50771.5	55468.2	2724.42	2681.46	2773.16	2.64623e-14	-4.24017	6.81764e-17	-63.0758	0.0529153	13.5774
HCMVUS17	5438.2	6703.33	6600.23	6125.08	6567.68	361.606	320.575	341.212	2.32671e-13	-4.20084	1.31147e-15	-49.6191	0.0543779	12.6333
HCMVUL94	16880.7	20581	20281.2	18570.3	20213.8	1094.65	983.561	1068.51	2.13957e-14	-4.19964	4.79576e-17	-64.9008	0.0544231	13.6697
HCMVUL48	60812.3	71385.4	72012.1	68144.6	71912.9	3911.54	3630.04	3773.37	7.22558e-15	-4.18803	7.77549e-18	-75.2121	0.0548626	14.1411
HCMVUL106	3655.02	4353.09	4458.77	4152.41	4617.22	222.851	258.514	228.642	1.7353e-12	-4.1645	1.2658e-14	-41.2656	0.055765	11.7606
HCMVUL111	3989.23	4162.54	4455.75	3127.18	3580.73	257.195	199.873	195.791	1.66341e-10	-4.14869	1.88899e-12	-27.4147	0.0563794	9.779
HCMVUL54	56549.2	64594.7	65313.2	62394.1	66671.1	3780.69	3384.02	3552.53	8.31798e-15	-4.1418	1.24108e-17	-72.4158	0.0566493	14.08
HCMVUL101	2336.9	2949.33	2702.1	2591.01	2913.32	164.211	160.245	143.071	1.44313e-11	-4.11295	1.29193e-13	-34.1464	0.0577934	10.8407
HCMVUL11	9292.53	9144.55	7980.83	9358.13	9052.76	578.288	549.46	443.591	2.18434e-13	-4.10399	1.19501e-15	-49.9953	0.0581537	12.6607
HCMVUL74	14250.4	17415.1	17143	15151.9	16769.8	968.726	922.79	947.508	2.13957e-14	-4.08834	5.05864e-17	-64.6206	0.0587879	13.6697
HCMVUL30	8648.71	10568	9625.03	9615	10638.6	615.442	581.742	541.085	8.13153e-14	-4.08093	3.16795e-16	-55.6856	0.0590906	13.0898
HCMVTRL3	8502.72	9831.06	7943.31	6991.25	7959.36	521.112	476.944	474.141	1.6548e-12	-4.06406	1.19336e-14	-41.464	0.0597856	11.7813
GPNMB	245.34	221.033	211.124	218.388	232.37	2004.16	1962.24	2171.97	1.26257e-13	3.18147	5.96541e-16	52.8971	9.07233	12.8987
HCMVUL132	71956.4	86448.3	88227.4	78942.8	88077.7	5211.69	4963.24	4928.65	1.97208e-14	-4.03444	3.75977e-17	-66.1941	0.0610258	13.7051
HCMVUL130	4796.47	6054.82	5963.71	5156.29	5584.87	390.183	306.7	328.017	2.89862e-12	-4.01409	2.23451e-14	-39.3994	0.0618924	11.5378
HCMVUL111A	6172.83	7808.18	7767.75	6400.71	7306.85	461.69	441.238	440.52	8.34055e-13	-3.9782	5.53087e-15	-44.1413	0.0634514	12.0788
HCMVIRL3	3131.96	3327.18	2915.2	2598.87	2920.08	191.433	199.872	178.445	7.39141e-12	-3.96899	6.1881e-14	-36.2605	0.0638581	11.1313
HCMVUL102	24878.5	31559.5	30133.2	27811.2	29934.5	2024.98	1823.22	1865.71	4.347e-14	-3.91854	1.36925e-16	-59.6075	0.0661304	13.3618
HCMVTRL5	1418.34	1459.49	1350.02	1412.9	1319.77	88.4525	105.523	87.4514	1.45436e-12	-3.89098	1.03676e-14	-41.9415	0.067406	11.8373
HCMVUL41	41778.6	50208.8	53101.7	49486.5	53984.6	3234.3	3471.04	3469.28	5.38536e-14	-3.86857	1.83024e-16	-58.2206	0.068461	13.2688
HCMVTRL4	1487.82	1456.04	1163.49	1196.28	1219.09	82.0242	96.9579	91.0363	8.45856e-10	-3.8564	1.14549e-11	-23.6355	0.0690411	9.0727
HCMVUL72	18791.4	22866.3	21709.3	20115.6	21694.5	1589.46	1397.07	1378.47	4.89957e-14	-3.85323	1.62453e-16	-58.7865	0.069193	13.3098
HCMVUL131	1339.59	1585.25	1670.83	1480.1	1739.54	108.429	121.311	102.353	2.01475e-10	-3.81479	2.33808e-12	-26.9387	0.0710616	9.69578
HCMVUL44	57291.1	65360.1	66868.5	63501.7	66139.8	4629.54	4337.84	4647.86	9.00501e-15	-3.81253	1.41823e-17	-71.6371	0.0711726	14.0455
HCMVUL99	34098.5	43284.8	40714.5	42308.5	41715.4	3106.97	2753.97	2789.87	8.54814e-14	-3.80625	3.54283e-16	-55.1825	0.0714833	13.0681
HCMVUL24	10459.5	13683.9	13306	12035	13133	902.968	864.782	917.024	2.14122e-13	-3.80031	1.14206e-15	-50.1797	0.071778	12.6693
HCMVUL129	1747.33	2270.17	2338.94	1998.59	2302.58	163.486	149.684	143.651	3.59267e-10	-3.79692	4.55635e-12	-25.5009	0.0719473	9.44458
HCMVUL45	30113.4	34135.2	35573.8	34547.4	36066.7	2451.21	2456.48	2521.73	8.31798e-15	-3.78008	1.2405e-17	-72.4186	0.0727917	14.08
HCMVUL6	3222.87	3770.1	3645.52	3342.15	4231.34	245.743	335.026	226.872	8.98706e-11	-3.77126	9.60984e-13	-28.9774	0.0732381	10.0464
HCMVUL124	3606.02	4666.91	4050.16	3534.5	4816.46	337.251	306.666	266.949	1.48513e-10	-3.76134	1.6496e-12	-27.7213	0.0737433	9.82824
HCMVUL43	9402.91	11108.1	11927.4	10879.4	12193.6	735.607	836.375	895.427	7.19472e-13	-3.7541	4.59212e-15	-44.8141	0.0741144	12.143
HCMVUL70	15878.2	19719.1	18772.3	17410.6	18683.8	1455.01	1292.19	1353.32	5.4947e-14	-3.7242	1.95849e-16	-57.9016	0.0756667	13.2601
HCMVUL35	16747.8	20829.2	20102.6	18368.1	19835.9	1662.4	1461.72	1428.15	1.41509e-13	-3.65872	6.80331e-16	-52.3357	0.0791797	12.8492
HCMVUL42	12131.2	16256	13891.2	13505.5	14316.6	1171.82	1200.49	1033.11	5.20499e-13	-3.62359	3.19272e-15	-46.1582	0.0811316	12.2836
HCMVUL120	2086.46	2675.8	2067.57	1938.35	2490.83	242.864	186.602	140.64	4.46408e-09	-3.59071	8.06672e-11	-20.1076	0.0830022	8.35027
HCMVUL33	14642.9	16621.4	15470.2	15521.8	15783.4	1432.86	1281	1209.71	3.29692e-14	-3.57962	9.29172e-17	-61.5118	0.0836427	13.4819
HCMVUL80	10341.9	12352.2	13407.8	11825.7	12824.8	1000.89	1018.41	1087.54	2.14122e-13	-3.54748	1.15367e-15	-50.1385	0.0855268	12.6693
HCMVUL95	14021.6	15707.7	16417.6	15666.4	15884.1	1379.94	1305.4	1329.4	9.88858e-15	-3.53565	1.72132e-17	-70.5214	0.0862312	14.0049
HCMVUL3	30173.7	34718.8	32418.7	27768	32179.1	2805.94	3111.53	2347.6	2.56606e-12	-3.51871	1.95688e-14	-39.8275	0.0872493	11.5907
HCMVUL23	11043	13488.9	13685.9	12633.4	13450.4	1096.75	1118.71	1160.6	8.52322e-14	-3.51027	3.46185e-16	-55.2861	0.0877613	13.0694
HCMVUL51	6609.27	7573.3	7350.2	7415.71	7482.2	645.505	654.989	616.534	2.13957e-14	-3.51026	5.14321e-17	-64.5338	0.0877623	13.6697
HCMVUL69	31700.3	40168.1	36670.2	35996.7	38117.7	3498.16	3027.08	3110.71	1.88544e-13	-3.50601	9.68978e-16	-50.854	0.0880208	12.7246
HCMVUL18	1694.09	1863.42	1858.36	1550.33	1736.11	184.219	150.325	148.414	2.95641e-11	-3.44109	2.89171e-13	-31.9708	0.0920721	10.5292
HCMVUS27	5072.46	6348.16	6302.14	5779.1	6045.07	561.128	548.14	523.773	6.95143e-13	-3.4365	4.37921e-15	-44.9874	0.0923659	12.1579
HCMVTRS1	16303.3	19081.1	19822.3	17731.6	19411.9	1779.68	1774.38	1785.48	3.75525e-14	-3.37169	1.1206e-16	-60.5843	0.0966097	13.4254
HCMVUS21	1564.48	1766.55	1945.12	1686.43	1916.73	171.363	175.412	168.793	4.29572e-11	-3.36568	4.41537e-13	-30.883	0.0970127	10.367
HCMVUS29	6762.55	8489.52	8015.36	6496.87	7642.96	837.859	749.971	632.701	1.82319e-11	-3.34022	1.69262e-13	-33.4013	0.0987401	10.7392
HCMVUL50	16896	18683	19532.2	18615.4	19490.6	1799.72	1908.97	1856.73	1.52809e-14	-3.32748	2.78664e-17	-67.8209	0.0996162	13.8158
HCMVUL118	9217.87	11343.6	9519.42	9206.94	10697.7	1082.41	1025.67	893.006	1.45436e-12	-3.32031	1.0362e-14	-41.9433	0.100112	11.8373
HCMVUL98	43078.4	53209.5	55499.8	50575.1	54624.7	5129.39	5103.66	5379.87	2.25686e-13	-3.29836	1.2534e-15	-49.802	0.101647	12.6465
HCMVUL115	23193.4	28227.4	26364.4	25315.3	28327.8	2976.83	2583.77	2555.83	3.75189e-13	-3.27991	2.27029e-15	-47.4553	0.102955	12.4257
HCMVUL119	5558.66	6434.94	5672.61	5591.39	5777.04	724.144	606.13	546.438	2.21118e-12	-3.22244	1.64959e-14	-40.3854	0.107139	11.6554
HCMVUL49	29194.8	34325.7	35376.4	32267.3	34585.6	3631.89	3551.49	3451.89	5.4947e-14	-3.22195	1.92188e-16	-57.9903	0.107175	13.2601
HCMVUL12	3049.18	3390.33	3759.01	3040.71	3433.8	363.71	341.623	372.866	5.28525e-12	-3.21051	4.29339e-14	-37.3576	0.108029	11.2769
HCMVUL116	18859.9	22139	19840.1	19754.6	21688.6	2529.14	2257.24	2172.14	2.04604e-13	-3.141	1.06847e-15	-50.4519	0.113361	12.6891
HCMVUL117	14932	18988.6	15324.2	14222.5	17793	2210.2	1796.14	1640.02	5.23601e-11	-3.11306	5.46865e-13	-30.3469	0.115578	10.281
HCMVUL4	58134.1	66577.7	69025.8	57035.9	66142.7	7854.81	7174.35	7367.74	2.89947e-13	-3.08254	1.70642e-15	-48.5692	0.118049	12.5377
HCMVUL34	36252.6	46172.9	44169.4	40092.6	42976	5318.19	4823.97	4680.75	7.61603e-13	-3.08232	4.98729e-15	-44.5142	0.118067	12.1183
HCMVUL73	28453.9	29693.2	31556.3	30401.7	32431.7	3670.5	3449.24	3937.32	8.15453e-14	-3.04962	3.24451e-16	-55.5778	0.120774	13.0886
HCMVUS16	2786.54	2986.7	3265.58	2994.18	3229.33	328.665	396.36	389.617	3.32445e-12	-3.04172	2.6179e-14	-38.8945	0.121437	11.4783
HCMVUL5	106657	118462	118575	101425	112821	15135.6	12637	13167.3	1.29464e-12	-3.03333	8.90712e-15	-42.4629	0.122145	11.8878
HCMVUL128	2079.46	2559.64	2477.05	2660	2924.12	296.483	326.438	315.398	3.23884e-10	-3.01381	3.91968e-12	-25.8187	0.123809	9.48961
HCMVUL71	6827.9	8175.88	8519.7	7640.27	8276.38	1000.17	979.489	1017.51	5.38402e-13	-2.97678	3.34716e-15	-45.9813	0.127028	12.2689
HCMVUS26	6269	7720.08	7234.75	7130.9	7681.84	1002.32	938.597	925.935	7.30342e-13	-2.9119	4.72204e-15	-44.7125	0.132871	12.1365
HCMVUL96	3070.65	3902	3643.53	3765.59	3886.2	519.6	524.33	544.643	1.59286e-11	-2.78129	1.45237e-13	-33.8215	0.145461	10.7978
HCMVUL121	1965.88	2435.01	1974.81	1822.32	2553.87	388.157	352.287	230.428	3.27964e-08	-2.75504	9.40614e-10	-16.3713	0.148132	7.48417
HCMVUL97	21395.1	25322.5	25917.2	24312.8	26281.9	3707.69	3677.48	3752.96	3.30938e-13	-2.72695	1.97509e-15	-47.9955	0.151045	12.4803
PDGFRB	991.232	955.478	943.412	948.581	880.133	2603.82	2521.73	2659.46	1.59286e-11	1.45987	1.44314e-13	33.8392	2.75084	10.7978
FAIM2	141.085	143.617	129.23	149.37	139.69	601.238	567.199	593.83	2.0264e-11	2.06157	1.89807e-13	33.0902	4.1744	10.6933
HCMVUL22	131918	151084	168655	143674	157044	21857.3	25900	21517.9	2.04652e-11	-2.70432	1.9421e-13	-33.0282	0.153433	10.689
HCMVUL114	6209.61	7521.75	7277.27	7217.5	7744.77	1111.06	1102.9	1149.87	1.20541e-12	-2.6776	8.19328e-15	-42.7525	0.156301	11.9189
HCMVUL55	42710.5	47575.8	45422.8	46056.8	45949	7607.36	7000.84	6983.44	1.05668e-13	-2.66197	4.72982e-16	-53.9032	0.158003	12.9761
HCMVUL126	619.192	780.551	733.299	830.293	847.091	99.1581	160.405	117.98	4.63517e-08	-2.62186	1.50228e-09	-15.7365	0.162458	7.33393
HCMVUL56	17970	18823	19118.7	19209.6	18587.8	3010.43	3110.18	3363.3	8.07353e-14	-2.56894	3.07843e-16	-55.8153	0.168528	13.0929
HCMVUL40	68313.6	81959.5	85126.6	74747.6	82877.4	14536.3	12411.3	13585.6	1.247e-11	-2.53878	1.09567e-13	-34.6089	0.172088	10.9041
HCMVUL105	14735.8	16955.6	17117.3	16019.2	16501	2952.54	2711.11	2827.61	2.63676e-13	-2.52149	1.50809e-15	-49.0591	0.174164	12.5789
HCMVUL39	448.591	467.601	544.782	492.793	549.811	81.2819	87.0578	95.8263	2.84535e-09	-2.50426	4.66992e-11	-21.0414	0.176256	8.54586
HCMVUS15	9142.31	9677.01	10451	9185.86	9814.02	1769.69	1670.83	1836.4	2.80735e-13	-2.45559	1.62893e-15	-48.7529	0.182303	12.5517
HCMVUL19	1063.64	1114.37	1273.16	975.305	1243.54	210.778	207.169	202.409	2.4804e-09	-2.44799	3.8859e-11	-21.3646	0.183266	8.60548
HCMVUL58	400.495	423.221	351.346	383.04	345.012	87.1214	59.3871	65.9405	1.2421e-08	-2.44204	2.81078e-10	-18.1193	0.184023	7.90584
SRGN	121.683	96.8434	102.575	141.539	115.507	784.094	784.672	865.765	5.14473e-11	2.82518	5.33066e-13	30.4104	7.08702	10.2886
COL5A2	1744.31	1597.34	1673.7	1780.78	1704.97	4212.89	4132.71	4321.13	4.17387e-11	1.31305	4.25552e-13	30.9763	2.48466	10.3795
HCMVUL79	3767.49	4375.79	4357.07	4388.34	4502.15	751.327	877.964	752.376	1.05119e-11	-2.43058	9.06195e-14	-35.1494	0.185491	10.9783
HCMVUS24	4705.62	5343.93	5383.36	5043.98	5370	1023.77	922.762	950.47	9.12376e-13	-2.41944	6.12586e-15	-43.776	0.186928	12.0398
HCMVUS30	6704.32	7997.61	7585.07	6866.55	7568.89	1614.47	1418.82	1313.2	2.04652e-11	-2.34364	1.95084e-13	-33.0161	0.197013	10.689
PCDH1	541.639	590.611	600.982	618.854	587.044	85.5449	93.6094	102.935	1.0245e-10	-2.64544	1.10399e-12	-28.6497	0.159825	9.98949
TIMP2	6986.29	6798.67	6638.67	6880.65	6826.95	15069.5	14780.3	15150.9	8.4367e-11	1.1359	8.95141e-13	29.1464	2.19756	10.0738
DAPK1	452.746	523.323	522.032	501.892	482.93	51.9659	49.4614	60.4724	1.27023e-10	-3.20413	1.37931e-12	-28.1313	0.108508	9.89612
HCMVUS7	910.563	1106.26	993.729	862.628	1009	209.96	184.636	186.732	1.9156e-09	-2.32995	2.92167e-11	-21.8754	0.198891	8.71769
HCMVUS14	12177.2	14875.7	14323.5	12903.7	13730.2	3074.14	2544.88	2570.23	3.40469e-11	-2.31881	3.44307e-13	-31.5178	0.200433	10.4679
HCMVUL20	4906.75	5541.85	5219.63	4732.27	5326.39	1131.19	999.397	1023.64	3.45413e-12	-2.29058	2.74864e-14	-38.7403	0.204393	11.4617
HTRA1	675.49	631.056	662.153	684.522	692.756	1674.28	1665.01	1853.05	1.3562e-10	1.36976	1.49515e-12	27.9458	2.58428	9.86768
HCMVUL28	6125.89	7206.24	7326.56	6906.1	7302.94	1537.3	1412.27	1492.84	3.9517e-12	-2.23317	3.17734e-14	-38.2855	0.21269	11.4032
CCN3	575.331	535.403	522.021	487.068	500.957	1566.29	1451.73	1621.12	1.57158e-10	1.56249	1.77167e-12	27.5593	2.95362	9.80366
JUP	2094.8	2059.82	1997.4	2102.01	1990.46	4219.77	4113.71	4106.82	1.5017e-10	1.01755	1.68045e-12	27.6792	2.02447	9.82342
EPCAM	928.936	998.495	1041.11	857.527	942.865	175.635	172.754	157.401	2.16635e-10	-2.49767	2.54991e-12	-26.7475	0.177063	9.66427
IGF2BP1	2582.14	2634.02	2566.87	2516.3	2571.45	1241.75	1317.35	1288.34	1.78919e-10	-1.00527	2.04665e-12	-27.2348	0.498175	9.74734
HCMVUL26	6508.07	7577.92	7670.97	6950.94	7643.34	1625.96	1527.04	1499.39	3.3e-12	-2.22714	2.57129e-14	-38.9514	0.213582	11.4815
HCMVUL15	1778.89	1828.84	2045.89	1953.41	1996.99	406.095	393.28	458.235	3.17403e-11	-2.19707	3.13088e-13	-31.7638	0.218081	10.4984
HCMVUL29	5986.93	6968.05	7279.19	6887.01	7376.02	1522.99	1508.59	1696.99	2.30855e-11	-2.1282	2.21976e-13	-32.6695	0.228744	10.6367
DSP	1006.51	1074.13	1116.17	1036.47	1048.35	323.822	363.646	370.798	2.705e-10	-1.58322	3.22878e-12	-26.2336	0.333736	9.56783
HCMVUL112/113	39187.3	46526.7	47164.6	42972.5	46144.2	10588.1	10222.7	10618	8.27998e-12	-2.08025	7.00064e-14	-35.8974	0.236474	11.082
HCMVUS32	3476.36	4005.01	4117.2	3677.64	4046.51	1062.39	980.15	1033.08	2.87217e-11	-1.91223	2.78551e-13	-32.0688	0.265682	10.5418
LSR	504.884	588.709	630.577	567.539	604.958	58.4139	52.7816	57.5178	3.44965e-10	-3.35959	4.31778e-12	-25.614	0.0974234	9.46223
CAA35346.1	3162.58	3073.69	3396.83	2392.02	2879.86	87.8012	81.8829	61.2507	3.44965e-10	-5.27946	4.2965e-12	-25.6244	0.0257469	9.46223
HCMVUL27	10051.8	11674.2	11896.8	11339.3	12281.3	2999.83	3187.55	3296.5	3.3439e-11	-1.85424	3.34835e-13	-31.5898	0.276578	10.4757
HCMVUS23	7119.16	7967.57	8309.45	7430.39	7857.15	2136.57	2080.5	2236.26	6.87477e-12	-1.84499	5.69859e-14	-36.505	0.278357	11.1627
HCMVUS25	1158.86	1357.37	1192.09	1261.05	1311.79	369.428	346.887	335.149	2.77658e-10	-1.83981	3.33724e-12	-26.1625	0.279358	9.55649
HCMVUL13	43217.3	50974.1	49684.1	47185.9	50800.2	14256.9	13378.6	13323.1	3.3439e-11	-1.82296	3.35387e-13	-31.5856	0.28264	10.4757
HCMVUL57	6227.05	6348.51	6421.58	6382.99	6204.51	1726.84	1740.18	1935.29	1.73843e-12	-1.81227	1.28249e-14	-41.2216	0.284742	11.7598
HCMVUL14	4254.75	4947.2	5161.48	4561.49	5174.16	1356.13	1336.98	1488.29	1.84548e-10	-1.78759	2.12633e-12	-27.1496	0.289655	9.73389
HCMVUS31	3674.59	4545.2	4428.07	3844.8	4231.47	1234.76	1241.4	1128.86	3.3208e-10	-1.78284	4.07393e-12	-25.7368	0.290611	9.47876
CAV1	1698.31	1586.25	1610.55	1481.15	1618.21	3412.18	3579.19	3676.22	5.25826e-10	1.15396	6.79947e-12	24.6741	2.22524	9.27916
HCMVUL37	7025.06	7758.55	7540.72	7501.11	7902.52	2452.19	2251.58	2207.76	1.0179e-11	-1.71197	8.69061e-14	-35.2696	0.305242	10.9923
SEMA4D	796.075	843.347	850.656	854.289	866.52	322.33	284.96	272.382	7.16868e-10	-1.52592	9.38868e-12	-24.0266	0.347259	9.14456
MAP1B	3942.2	4105.78	3799.47	4031.57	3974.03	2092.88	2018.55	1945.53	5.78708e-10	-0.975803	7.53127e-12	-24.4672	0.508457	9.23754
ID2	651.966	637.265	671.053	623.128	613.701	1328.6	1289.86	1269.07	7.2012e-10	1.01959	9.49097e-12	24.0051	2.02734	9.1426
YARS1	2542.29	2644.39	2584.64	2796.15	2816.71	1302.61	1277.08	1285.96	7.50683e-10	-1.05388	9.95601e-12	-23.9106	0.481671	9.12454
EFEMP1	911.497	842.608	826.973	809.287	843.368	1700.44	1761.23	1783.9	7.69671e-10	1.0474	1.02716e-11	23.8491	2.06681	9.1137
GPX3	1119.95	1236.2	1221.75	1151.48	1218.52	446.153	491.008	494.15	8.61318e-10	-1.31776	1.18517e-11	-23.5692	0.401158	9.06484
HCMVUS22	23275.3	27230.6	26323.8	23829.4	25498.2	8792.44	7721.91	7903.53	2.06134e-10	-1.63214	2.40922e-12	-26.8725	0.32261	9.68585
MXRA8	1804.62	1896.66	1850.35	1801.39	1768.46	4430.07	3783.86	4185.69	8.4004e-10	1.17738	1.12804e-11	23.6655	2.26165	9.0757
LIPA	1082.15	984.896	1026.32	1004.97	1033.41	1956.82	2060.37	2089.96	8.58189e-10	0.987971	1.17375e-11	23.5881	1.98339	9.06642
TRIB2	331.139	289.357	356.226	354.644	319.453	869.005	931.973	923.071	1.05672e-09	1.46368	1.48907e-11	23.1292	2.7581	8.97604
COL3A1	1808.69	1566.22	1630.28	1721.82	1646.42	3799.32	3966.44	4315.81	9.35832e-10	1.2657	1.29546e-11	23.3968	2.40444	9.0288
HCMVUL16	5524	6526.7	6543.01	6105.37	6444.05	2181.22	1908.59	2154.07	3.53428e-10	-1.58121	4.453e-12	-25.5491	0.334202	9.4517
MARS1	4116.94	4226.48	4169.55	4214.22	4225.98	2457.02	2475.26	2424.67	1.04687e-09	-0.772911	1.46653e-11	-23.1584	0.585236	8.98011
SYNPO	1687.1	1739.69	1813.84	1645.57	1568.96	3654.53	3505.1	3643.92	1.09007e-09	1.09209	1.54511e-11	23.0587	2.13182	8.96254
SERTAD2	1620.63	1570.88	1514.84	1552.39	1600.34	776.752	805.88	830.838	1.17584e-09	-0.966764	1.67643e-11	-22.9039	0.511652	8.92965
CDC25B	2830.48	2718.23	2725.73	2742.88	2620.97	5000.26	4908.97	4874.57	1.19513e-09	0.853809	1.71384e-11	22.8621	1.80727	8.92259
SNN	643.812	598.277	676.963	579.672	676.447	1515.99	1660.77	1721.21	1.26682e-09	1.36316	1.83764e-11	22.7307	2.57248	8.89729
ODC1	4045.45	4247	4491.26	4033.02	4014.17	1973.15	2052.6	2093.17	1.20798e-09	-1.02944	1.74227e-11	-22.8311	0.489901	8.91794
UNC13A	143.129	109.826	100.601	127.629	116.369	551.83	473.21	511.901	1.77673e-09	2.1091	2.6804e-11	22.032	4.31422	8.75038
JAM2	332.152	331.775	325.632	357.308	330.713	745.527	703.661	717.533	1.54586e-09	1.10662	2.29368e-11	22.3179	2.1534	8.81083
HCMVUL123	13358.4	15351.3	14600.8	16011.8	16408.7	5323.66	5070.52	5372.17	3.3208e-10	-1.5236	4.05871e-12	-25.7447	0.347817	9.47876
PPL	1048.46	1025.33	1134.87	1108.82	1028.09	2095.11	2195.67	2258.14	1.33582e-09	1.03052	1.94881e-11	22.6206	2.04277	8.87425
HCMVUS9	3422.21	3583.07	3907.98	3424.76	3823.73	1249.77	1312.65	1343.77	1.30129e-10	-1.47866	1.42383e-12	-28.0581	0.358823	9.88562
HCMVUL17	15137.5	16484.9	16627.8	14402.9	16614	6119.99	6387.52	6473.67	4.52278e-10	-1.3232	5.81093e-12	-24.9955	0.399647	9.34459
TSPAN3	2596.47	2561.32	2404.01	2575	2559.2	4539.95	4720.32	4791.16	1.54014e-09	0.883568	2.27242e-11	22.3351	1.84493	8.81244
RNF114	2085.57	2172.25	2172.11	2137.76	2131.81	1138.01	1191.28	1224.29	1.5546e-09	-0.853467	2.31952e-11	-22.2972	0.553453	8.80838
CCNA1	499.622	539.666	540.855	443.473	514.671	110.696	107.601	94.0741	2.63709e-09	-2.28527	4.21883e-11	-21.2195	0.205147	8.57887
NGFR	277.937	286.472	286.202	303.214	289.904	79.9935	79.9619	65.3879	2.80594e-09	-1.94869	4.53546e-11	-21.0925	0.259052	8.55192
HCMVUL78	27972.6	30513.6	32005.3	29489	32935.6	12522.9	11735	13011.7	1.49571e-09	-1.29857	2.19447e-11	-22.3997	0.40653	8.82515
AIF1L	1086.14	1108.19	1185.3	898.02	959.096	152.058	153.65	170.011	2.59993e-09	-2.71716	4.13783e-11	-21.2536	0.152074	8.58504
HCMVUS13	12248.8	14059.9	13668.2	13251.4	13875.9	6102.2	5330.76	5539.93	1.60144e-09	-1.24687	2.40269e-11	-22.2323	0.421361	8.79549
TARS1	5161.27	5418.65	5443.6	5008.03	5179.53	2928.84	2801.51	2824.24	1.851e-09	-0.877958	2.8078e-11	-21.9475	0.544137	8.73259
SEPTIN3	490.53	535.515	531.908	506.291	502.816	197.959	193.373	207.318	2.78557e-09	-1.36337	4.47945e-11	-21.1143	0.388672	8.55509
EPHA2	3138.01	3293.22	3193.54	3159.71	3204.47	1898.64	1835.48	1901.76	2.02204e-09	-0.767445	3.10078e-11	-21.7679	0.587457	8.69421
TENT5B	577.321	650.751	709.606	605.409	628.874	132.098	161.055	152.183	2.99735e-09	-2.09796	5.06847e-11	-20.899	0.233588	8.52326
ERBB3	410.829	359.324	366.098	358.965	348.727	104.165	99.5762	101.781	3.35276e-09	-1.85522	5.69724e-11	-20.6971	0.276391	8.4746
NUCKS1	3735.83	3677.52	3583.32	4032.21	3822.4	7238.99	7410.42	7675.86	2.30621e-09	0.981696	3.55566e-11	21.5224	1.97479	8.6371
HEXB	4485.88	4207.88	4308.66	4341.91	4306.33	7898.6	7483.09	7785.52	2.36754e-09	0.834514	3.66984e-11	21.4661	1.78326	8.6257
ADGRA2	557.971	543.147	464.772	578.965	521.601	1329.69	1279.69	1415.92	2.53878e-09	1.33351	3.9984e-11	21.3141	2.52015	8.59538
GM2A	815.44	743.415	761.845	751.339	788.41	1489.5	1587.32	1673.18	2.47109e-09	1.03479	3.85083e-11	21.3806	2.04882	8.60711
SLC7A1	1892.38	2024.34	1881.01	2079.4	2123.8	935.114	936.171	973.732	2.54666e-09	-1.07528	4.03193e-11	-21.2993	0.474579	8.59403
VSTM4	241.212	253.288	272.349	292.447	281.811	645.435	693.539	696.158	2.99735e-09	1.34157	5.06812e-11	20.8991	2.53428	8.52326
PLXNA2	1054.53	1079.3	1034.25	1045.12	1093.97	469.946	534.859	513.608	2.82933e-09	-1.07143	4.62018e-11	-21.0601	0.475848	8.54832
PDCD4	501.735	483.822	468.745	497.742	446.072	993.688	1104.09	1023.13	2.822e-09	1.11637	4.58481e-11	21.0736	2.16801	8.54944
TENT5C	592.727	627.696	613.806	567.618	611.947	228.647	243.468	256.341	3.40594e-09	-1.31152	5.81585e-11	-20.6617	0.402897	8.46776
COL1A1	16025.4	15029.5	14837.6	15180.5	15478.8	30099.9	29157.5	31055.9	2.97223e-09	0.975509	4.93614e-11	20.9449	1.96633	8.52692
SH3BGRL	970.735	931.669	862.512	897.79	938.175	1699.42	1724.65	1696.09	2.97223e-09	0.892105	4.97672e-11	20.9307	1.85588	8.52692
PEG10	1090.33	1078.13	1047.05	1089.88	1088.47	1799.7	1912.02	1911.98	2.96855e-09	0.796986	4.89673e-11	20.9588	1.73747	8.52746
HCMVUS4	128.883	150.175	179.547	135.201	160.054	63.3824	56.6883	77.802	1.3396e-05	-1.18933	2.28189e-06	-8.23451	0.438508	4.87303
GEM	531.377	526.069	484.529	529.732	510.601	1000.3	1106.62	1041.58	3.46462e-09	1.02313	5.97349e-11	20.6159	2.03232	8.46034
SNAI2	293.322	356.977	330.577	331.369	310.121	735.352	752.308	732.309	3.77638e-09	1.19294	6.66752e-11	20.4285	2.28618	8.42292
HCMVUS8	2302.3	2412.27	2482.92	2430.68	2604.18	1143.94	1158.95	1210.9	9.51057e-10	-1.06147	1.32442e-11	-23.3541	0.479144	9.02179
SPINT1	1361.14	1499.96	1546.41	1383.32	1576.11	604.153	565.39	517.254	3.71234e-09	-1.39001	6.46214e-11	-20.4817	0.381562	8.43035
ADM2	696.788	849.129	686.919	860.898	836.098	143.607	135.309	131.824	5.04234e-09	-2.51467	9.28288e-11	-19.8741	0.174988	8.29737
TEAD4	713.2	733.577	720.443	661.641	666.613	279.741	307.259	289.098	4.39239e-09	-1.2573	7.90077e-11	-20.1424	0.418327	8.3573
GARS1	4216.04	4296.48	4216.93	4181.39	4284.57	2648.18	2548.65	2520.05	3.46462e-09	-0.720814	5.95389e-11	-20.6215	0.606755	8.46034
CTSF	815.492	886.468	866.437	867.195	873.319	1701.66	1541.09	1633.55	3.72486e-09	0.914352	6.54077e-11	20.4611	1.88472	8.42889
VAT1L	477.253	508.677	435.169	502.746	460.534	989.017	998.469	1047.47	4.09862e-09	1.08738	7.30441e-11	20.2742	2.12488	8.38736
NDRG4	186.047	144.33	174.628	165.724	161.976	514.757	472.873	456.914	5.04234e-09	1.53419	9.32065e-11	19.8674	2.89626	8.29737
HCMVUL38	13713	14640.8	15006.4	14349.7	15903.4	8037.15	7321.47	7950.5	1.73917e-08	-0.921595	4.32486e-10	-17.4768	0.527925	7.75966
CALHM2	108.387	103.897	118.386	121.705	123.448	342.195	311.088	346.002	5.48178e-09	1.53419	1.04292e-10	19.6824	2.89626	8.26108
TP53	1202.72	1208.5	1182.26	1224.19	1129.77	2012.52	2099.14	2111.26	3.72486e-09	0.802313	6.54568e-11	20.4598	1.74389	8.42889
PRCP	1211.91	1191.23	1183.24	1208.59	1187.44	1927.92	1982.69	2040.98	3.85018e-09	0.729358	6.82973e-11	20.3878	1.6579	8.41452
ARL4C	237.133	248.054	248.654	277.638	253.296	580.957	582.53	645.423	5.0055e-09	1.25352	9.16955e-11	19.8944	2.38423	8.30055
IGFBP4	7356.2	7129.01	6939.66	7829.64	7442.65	14543.7	13899.8	14410.9	4.36387e-09	0.961769	7.81329e-11	20.161	1.9477	8.36013
ULBP1	486.278	579.139	578.413	564.702	562.625	125.172	82.5347	84.5558	6.51992e-09	-2.53033	1.28085e-10	-19.3484	0.173099	8.18576
S1PR1	657.102	622.434	671.044	595.291	610.146	265.133	248.053	267.083	5.48178e-09	-1.27676	1.0451e-10	-19.679	0.412721	8.26108
KDM7A	480.259	471.023	489.496	485.797	493.69	223.994	223.413	207.004	5.77727e-09	-1.14996	1.10622e-10	-19.5861	0.450637	8.23828
RPF2	1253.81	1355.27	1313.52	1228.52	1276.96	625.841	625.072	679.395	4.74724e-09	-0.998352	8.61774e-11	-19.9974	0.500571	8.32356
DOC2B	243.229	237.022	239.795	276.207	230.245	54.8644	62.0531	52.1537	7.52637e-09	-2.13134	1.49729e-10	-19.0982	0.228245	8.12341
ATF3	1022.84	1165.77	1129	1194.33	1216.34	482.896	456.897	472.266	5.18349e-09	-1.28077	9.75342e-11	-19.7925	0.411576	8.28538
MME	2259.3	2058.97	2181.95	2368.83	2141.05	4251.37	4326.56	4655.63	4.93163e-09	1.00292	8.99336e-11	19.9266	2.00405	8.30701
HTRA3	583.524	580.215	624.661	622.238	651.571	1202.09	1228.05	1142.48	5.3502e-09	0.959678	1.01115e-10	19.7332	1.94488	8.27163
DNAJC6	291.262	357.15	364.164	323.745	325.833	57.693	59.3583	72.4983	8.37958e-09	-2.39442	1.72954e-10	-18.8698	0.190199	8.07678
GPC6	210.545	187.671	190.429	214.452	208.653	454.506	450.687	458.742	6.76282e-09	1.17029	1.33978e-10	19.276	2.25056	8.16987
ASAH1	2023.26	1839.83	1886.87	1746.94	1770.31	3564.38	3616.19	3766.36	5.08743e-09	0.979026	9.44615e-11	19.8453	1.97113	8.2935
CADM1	1174.13	1178.98	1215.8	1175.51	1160.61	2099.28	1955.48	1966.81	5.14146e-09	0.764621	9.63171e-11	19.8132	1.69892	8.28891
RNF187	1953.76	1910.73	1952.02	1922.91	1954.56	3135.2	3122.55	3022.79	5.10428e-09	0.67399	9.51975e-11	19.8325	1.59548	8.29207
QPRT	771.515	771.038	746.052	645.55	662.662	1630.79	1577.25	1707.31	5.98962e-09	1.19096	1.15681e-10	19.5133	2.28304	8.2226
ABCB9	177.826	168.857	172.682	169.481	170.041	379.976	358.011	379.244	8.1564e-09	1.1189	1.66995e-10	18.9251	2.17182	8.0885
SLC6A6	1181.3	1141.8	1047.03	1228.31	1077.07	2313.23	2203.76	2288.73	5.98962e-09	1.00085	1.15279e-10	19.5189	2.00117	8.2226
RAP1GAP2	703.002	775.83	705.627	696.253	738.908	314.11	344.919	326.882	7.62211e-09	-1.13951	1.52897e-10	-19.0649	0.453915	8.11792
EBNA1BP2	2063.05	2042.13	2171.14	1913.57	1950.45	1083.08	1006.56	994.952	6.12901e-09	-0.979431	1.19218e-10	-19.4644	0.50718	8.21261
SLC44A1	875.74	824.47	767.754	960.991	895.029	1886.25	1878.44	1934.82	6.12901e-09	1.13903	1.19898e-10	19.4552	2.20232	8.21261
PAM	2901	2765.57	2856.98	2995.69	3010.57	5064.87	4883.24	5018.89	6.12901e-09	0.780292	1.19848e-10	19.4559	1.71748	8.21261
FOXRED2	776.614	830.705	746.056	821.602	716.097	1553.53	1490.1	1535.61	6.52536e-09	0.974022	1.28733e-10	19.3403	1.96431	8.1854
OLFM1	201.354	211.061	199.315	210.106	211.247	464.645	432.658	489.17	8.47264e-09	1.15895	1.77422e-10	18.8297	2.23295	8.07198
YOD1	1139.32	1182.94	1234.6	1044.23	1082.75	500.743	501.781	490.781	7.62627e-09	-1.18887	1.53613e-10	-19.0574	0.438645	8.11769
PDK4	67.5341	84.9175	94.6993	90.4741	77.7142	265.981	275.15	275.57	1.10644e-08	1.72197	2.4354e-10	18.3379	3.29886	7.95607
HSPA1A	1240.5	1550.63	1430	1369.94	1405.38	558.617	574.308	566.17	8.11664e-09	-1.3013	1.65508e-10	-18.9392	0.40576	8.09062
HSPA2	691.817	702.007	675.982	618.742	633.456	1422.35	1267.66	1378.8	7.88543e-09	1.02984	1.59486e-10	18.9979	2.0418	8.10317
STS	439.379	415.783	406.584	423.379	396.338	806.515	762.082	824.024	8.47264e-09	0.939129	1.78386e-10	18.8211	1.91737	8.07198
HCMVUS18	47210.7	48363	49764	43492.5	50859.8	26675.5	26604.3	27219.2	6.53969e-08	-0.835156	2.29301e-09	-15.1826	0.560522	7.18444
DPP4	1184.36	1184.11	1094.4	1403.34	1261.24	2839.91	2807.45	2777.33	7.60326e-09	1.20113	1.51889e-10	19.0754	2.2992	8.119
FAM83G	1086.21	1094.73	1210.91	1154.24	1135.18	581.639	595.583	607.719	8.45261e-09	-0.932256	1.75428e-10	-18.8474	0.524038	8.07301
ILDR2	266.691	244.081	275.35	272.855	284.818	59.1958	72.7015	78.0728	1.26587e-08	-1.94568	2.90656e-10	-18.0686	0.259592	7.89761
APLN	94.0793	104	101.609	91.3245	110.588	263.638	272.255	291.331	1.22835e-08	1.46109	2.72527e-10	18.1662	2.75317	7.91068
MGAT4B	2711.97	2765.63	2786.91	2678.73	2831.69	4564	4372.99	4422.2	8.09261e-09	0.692713	1.64348e-10	18.9503	1.61632	8.09191
CHD7	497.6	492.787	446.073	467.69	473.987	163.758	150.6	118.668	1.22835e-08	-1.73307	2.72876e-10	-18.1643	0.300812	7.91068
MIEF1	1581.84	1685.51	1700.37	1629.32	1624.24	937.68	987.991	924.732	8.45261e-09	-0.791571	1.75863e-10	-18.8435	0.577715	8.07301
NFATC4	1294.7	1302.44	1218.76	1372.2	1329.28	2641.71	2555.85	2331.71	8.35833e-09	0.944336	1.71822e-10	18.8801	1.9243	8.07788
HSPH1	6937.23	7293.14	7699.58	6751.71	6858	3553.64	3718.94	3887.77	8.47264e-09	-0.933482	1.77695e-10	-18.8272	0.523593	8.07198
C6orf132	315.727	380.874	353.33	365.751	361.535	109.432	115.768	100.89	1.35193e-08	-1.70583	3.16686e-10	-17.9393	0.306546	7.86904
AMOTL2	1974.15	2019.78	1936.26	2000.31	1996.16	1173.4	1181.74	1063.42	8.75977e-09	-0.80224	1.8661e-10	-18.7505	0.573458	8.05751
GALNT2	2490.21	2414.58	2468.16	2595.8	2416.37	3989.3	4044.46	4124.94	8.56259e-09	0.710868	1.81699e-10	18.7922	1.63679	8.06739
PLIN2	1656.43	1569.77	1690.49	1668.22	1638.78	2892.48	3055.89	3358.22	8.56259e-09	0.913373	1.81369e-10	18.7951	1.88344	8.06739
COL5A3	928.843	884.195	892.126	821.53	937.357	1621.37	1661.28	1585.67	9.10825e-09	0.863659	1.94788e-10	18.6834	1.81965	8.04057
KBTBD11	313.706	333.929	327.648	329.964	333.751	106.5	132.949	115.277	1.40363e-08	-1.47561	3.34012e-10	-17.8595	0.359582	7.85275
ALDH3B1	182.955	207.722	171.681	218.925	208.78	483.468	501.779	499.386	1.2421e-08	1.32625	2.80583e-10	18.122	2.5075	7.90584
IGFBP3	1163.96	1317.66	1296.7	1254.93	1099.24	2872.05	3215.97	3634.67	9.62782e-09	1.39871	2.06698e-10	18.591	2.63666	8.01647
SELENBP1	524.23	491.469	467.747	538.39	501.103	958.501	953.148	928.682	1.10222e-08	0.909904	2.41203e-10	18.3527	1.87892	7.95773
ARG2	305.588	272.161	344.401	314.02	347.212	64.8291	72.5374	71.8559	1.62443e-08	-2.17865	3.98566e-10	-17.5969	0.220882	7.7893
DDR1	1185.37	1207.51	1257.25	1294.25	1191.62	2076.47	2030.34	2142.27	9.87023e-09	0.763819	2.13539e-10	18.5405	1.69798	8.00567
ADM	1945.66	2349.57	2402.02	1945.07	2136.54	470.971	625.272	631.454	1.10644e-08	-1.91195	2.43959e-10	-18.3353	0.265734	7.95607
EI24	1558.28	1434.59	1556.3	1542.95	1517.82	2699.97	2497.23	2612.36	9.87023e-09	0.774516	2.1335e-10	18.5419	1.71062	8.00567
DIAPH1	3104.31	3083.34	3018.85	3131.01	2996.99	1771.1	1894.76	1925.54	1.05943e-08	-0.719239	2.30082e-10	-18.4253	0.607418	7.97493
TCP1	6580.6	6984.41	7421.3	6498.12	6844.4	3440.03	3732.96	3746.65	1.08372e-08	-0.91509	2.36255e-10	-18.3845	0.530311	7.96508
GBP2	186.024	199.878	158.843	224.968	215.647	554.912	561.739	598.963	1.41924e-08	1.547	3.39987e-10	17.8329	2.92209	7.84794
PTMA	8344.31	8010.72	8221.61	8261.67	7934.53	13214.8	13341	13401.9	1.24116e-08	0.708088	2.77534e-10	18.1386	1.63364	7.90617
GAN	572.224	650.675	590.157	592.32	649.489	262.587	273.565	254.312	1.51099e-08	-1.21214	3.66977e-10	-17.7192	0.431629	7.82074
GRAMD4	410.812	387.061	377.942	411.921	429.792	758.149	843.528	810.082	1.39729e-08	0.994226	3.31255e-10	17.8719	1.99201	7.85471
CD99L2	997.32	918.583	958.239	1025.97	948.377	1628.54	1663.04	1638.78	1.26586e-08	0.762039	2.88553e-10	18.0796	1.69589	7.89762
DNAJB1	3210.62	3650.93	3651.43	3300.5	3485.36	1832.38	1879.23	1916.13	1.24116e-08	-0.881414	2.7778e-10	-18.1372	0.542835	7.90617
TNFAIP2	1647.21	1727.9	1623.39	1764.54	1845.47	2992.71	3190.92	3131.27	1.2421e-08	0.851947	2.80727e-10	18.1212	1.80494	7.90584
CD55	4652.47	5084.32	5126.77	4983.44	4945.2	2832.64	2673.77	2460.93	1.25562e-08	-0.902377	2.85179e-10	-18.0974	0.535005	7.90114
C14orf132	998.369	893.39	873.345	1057.87	988.676	1956.97	2194.9	2114.23	1.27408e-08	1.11995	2.94651e-10	18.048	2.1734	7.8948
DPYSL2	1236.46	1166.91	1191.13	1211.91	1196.76	1873.6	2017.67	1976.47	1.26918e-08	0.703404	2.92467e-10	18.0592	1.62834	7.89648
PTN	676.483	677.014	657.234	749.74	723.093	1315.69	1236.19	1309.42	1.35113e-08	0.886872	3.14712e-10	17.9487	1.84916	7.8693
PCYOX1	1087.24	907.27	879.273	907.127	946.564	1988.17	1915.41	1988.58	1.28913e-08	1.05845	2.992e-10	18.0248	2.08269	7.8897
LPCAT1	2009.98	1952.86	1975.69	1934.89	1966.45	2988.52	2981.76	3065.13	1.26587e-08	0.614005	2.90229e-10	18.0708	1.5305	7.89761
PMP22	654.012	639.839	598.999	626.583	626.604	1177.02	1112.15	1273.75	1.39729e-08	0.915159	3.29463e-10	17.88	1.88578	7.85471
SHE	248.342	265.565	278.295	226.594	234.521	57.722	67.3343	65.3519	2.30648e-08	-1.97524	5.96503e-10	-17.0112	0.254327	7.63705
NID1	3022.57	2733.77	2547.1	3104.97	2757.77	5911.71	6008.17	5962.16	1.35193e-08	1.0767	3.1714e-10	17.9372	2.1092	7.86904
FKBP4	4903.79	4941.39	5683.41	4567.15	4683.15	2395.08	2341.45	2349.23	1.39729e-08	-1.06505	3.30416e-10	-17.8757	0.477955	7.85471
AQP3	90.0082	92.6347	83.8294	98.2191	108.764	273.952	256.044	251.174	2.26253e-08	1.46539	5.8326e-10	17.0433	2.76138	7.64541
TUB	461.88	421.666	438.156	440.575	456.532	766.116	774.464	795.059	1.65174e-08	0.810931	4.06636e-10	17.5674	1.75434	7.78206
CD109	1517.48	1397.13	1539.49	1403.12	1440.87	2581.62	2452.52	2672.54	1.40363e-08	0.816035	3.35085e-10	17.8547	1.76056	7.85275
GATA2	778.687	840.888	870.407	746.048	826.183	386.129	372.892	361.192	1.76177e-08	-1.11891	4.39566e-10	-17.453	0.460442	7.75405
DES	651.977	689.918	687.832	658.671	639.517	303.152	236.869	282.153	1.90708e-08	-1.28696	4.83727e-10	-17.3133	0.409814	7.71963
STX3	1890.43	1994.34	2090.19	1772.96	1940.7	1007.67	986.478	1034.79	1.50502e-08	-0.938467	3.62213e-10	-17.7386	0.521787	7.82246
GABRQ	504.818	552.022	581.268	553.211	608.038	206.598	227.161	193.557	2.10332e-08	-1.42123	5.40475e-10	-17.1528	0.373393	7.67709
VARS1	2142.79	2459.68	2350.74	2369.05	2272.04	1242.5	1315.41	1300.98	1.51099e-08	-0.848922	3.66399e-10	-17.7215	0.555199	7.82074
SLFN11	1500.03	1322.45	1307.6	1381.01	1288.11	2437.42	2596.38	2597.46	1.50502e-08	0.905082	3.63032e-10	17.7352	1.87265	7.82246
ARMCX2	862.425	843.681	836.862	858.037	853.053	1314.57	1404.7	1381.66	1.5776e-08	0.683502	3.84461e-10	17.6502	1.60603	7.802
P3H4	876.74	812.502	801.323	842.356	820.249	1360.21	1374.52	1435.37	1.60549e-08	0.742341	3.92588e-10	17.6192	1.67289	7.79439
FUT8	655.013	655.519	640.465	670.065	647.401	1038.96	1091.56	1120.43	1.73917e-08	0.728845	4.32159e-10	17.4779	1.65731	7.75966
HCMVUS12	19091	20898.3	20016.7	19310.5	20000.4	12148.9	11308.8	11506.1	2.71735e-08	-0.769141	7.23035e-10	-16.7382	0.586767	7.56585
SDC3	2669.06	2681.01	2713.88	3149.02	2868.63	5360.56	5502.13	5537.45	1.68824e-08	0.95959	4.17022e-10	17.5303	1.94476	7.77257
CEBPG	1191.47	1286.32	1324.39	1370.79	1413.97	574.36	652.282	597.945	1.92743e-08	-1.11488	4.90486e-10	-17.2932	0.46173	7.71502
GOT1	1663.51	1697.14	1623.42	1668.68	1702.95	1062.69	1024.82	1080.63	1.81763e-08	-0.661977	4.56517e-10	-17.3977	0.632012	7.74049
LLGL2	321.936	359.484	375.985	320.918	342.846	94.8911	83.7579	114.442	2.94674e-08	-1.82476	8.08496e-10	-16.5814	0.282287	7.53066
MARVELD1	696.924	749.533	703.618	884.082	789.345	1678.68	1616.93	1729.13	1.86498e-08	1.13566	4.71502e-10	17.3506	2.19719	7.72933
SLC5A3	1414.29	1264.14	1429.93	1735.68	1492.41	3911.04	4629.87	5022.98	1.81763e-08	1.62336	4.56514e-10	17.3977	3.08091	7.74049
KRT18	1257.87	1261.26	1364.86	1292.76	1283.1	777.804	711.106	732.339	1.9707e-08	-0.803275	5.0313e-10	-17.2563	0.573047	7.70538
KCNN4	122.698	139.34	142.072	112.903	138.026	334.097	322.251	320.366	2.80815e-08	1.31824	7.57445e-10	16.6728	2.49362	7.55158
SEMA4B	589.632	562.2	599.011	655.337	627.603	1082.12	1169.23	1136.8	2.01731e-08	0.89742	5.16703e-10	17.2177	1.86273	7.69523
MYOF	2126.46	2146.22	2152.35	2194.78	2189.3	3213.37	3238.78	3321.81	1.86068e-08	0.591685	4.6887e-10	17.3587	1.50701	7.73033
GFOD1	311.678	329.504	332.576	303.801	328.475	145.259	136.202	136.908	2.96564e-08	-1.20371	8.1614e-10	-16.5683	0.434157	7.52788
CCND2	757.115	862.468	838.896	877.765	939.062	277.606	343.059	277.699	2.49301e-08	-1.519	6.48878e-10	-16.8912	0.348929	7.60328
LRRC3	100.173	85.9284	85.8245	100.224	73.504	256.89	261.666	251.894	3.11472e-08	1.54072	8.74038e-10	16.4729	2.90939	7.50658
C1QTNF6	124.708	130.883	104.568	120.91	133.922	350.085	303.644	327.197	3.0035e-08	1.41613	8.36517e-10	16.5339	2.66869	7.52237
CAMSAP3	208.528	257.666	238.797	228.257	237.025	71.3164	62.0147	55.7197	3.51145e-08	-1.89571	1.02456e-09	-16.2537	0.268741	7.45451
PLPPR4	190.09	138.443	171.688	159.841	142.311	414.372	438.701	440.32	2.90839e-08	1.4353	7.90998e-10	16.612	2.70439	7.53635
S100A3	206.47	178.96	202.271	180.503	192.192	405.766	468.308	458.251	2.90839e-08	1.20937	7.88706e-10	16.6161	2.31236	7.53635
HSPB7	299.502	267.598	299.948	214.865	230.579	937.155	758.256	877.395	2.67591e-08	1.71487	7.08948e-10	16.7659	3.28268	7.57253
SLC22A17	308.637	288.661	304.916	300.153	291.188	587.817	554.818	532.307	2.80241e-08	0.901487	7.49099e-10	16.6883	1.86799	7.55247
TMEM35A	99.1817	110.088	85.8099	135.786	107.127	341.729	334.456	368.999	3.29772e-08	1.7114	9.48533e-10	16.3597	3.27478	7.48179
STK40	1570.55	1729	1601.7	1684.2	1712.33	931.514	1000.25	949.111	2.40975e-08	-0.788323	6.25209e-10	-16.9441	0.579017	7.61803
KIAA1217	376.064	330.953	351.3	420.731	368.697	798.362	755.172	774.709	2.80241e-08	1.07437	7.50314e-10	16.6861	2.1058	7.55247
EIF1B	1217.02	1320.76	1293.79	1271.01	1342.41	728.288	774.464	756.823	2.557e-08	-0.774663	6.67652e-10	-16.8508	0.584525	7.59227
PTCH1	276.956	299.197	266.434	290.78	278.416	87.8018	109.672	105.584	3.90475e-08	-1.48654	1.16198e-09	-16.0819	0.356868	7.40841
HCMVUS35	779.646	854.272	882.289	865.211	930.839	478.939	523.496	563.543	1.38033e-06	-0.725859	1.25973e-07	-10.7302	0.604637	5.86002
DOCK9	696.911	711.618	744.101	629.262	693.87	339.05	308.328	317.049	3.11472e-08	-1.10948	8.77821e-10	-16.4669	0.463461	7.50658
SLC25A25	835.828	808.476	931.644	831.397	849.862	428.019	409.625	449.31	3.0035e-08	-0.990131	8.35289e-10	-16.536	0.503432	7.52237
PYCR1	866.518	1019.91	934.577	989.838	1011.52	468.665	465.613	439.981	2.98332e-08	-1.07263	8.25953e-10	-16.5516	0.47545	7.5253
TUBB2B	522.18	593.552	602	554.971	558.071	204.459	168.291	229.024	3.58468e-08	-1.50761	1.0489e-09	-16.2215	0.351694	7.44555
CHRNB1	322.914	337.279	336.523	304.654	345.723	132.311	130.882	146.538	4.01865e-08	-1.27072	1.21082e-09	-16.0261	0.414454	7.39592
CDK6	1061.66	1086.34	1183.29	1035.69	1108.74	525.217	581.287	586.409	2.98074e-08	-0.957479	8.22768e-10	-16.557	0.514956	7.52568
SUMO3	1249.69	1125.71	1198.06	1305.77	1253.84	2093.98	2094.39	2110.71	2.67591e-08	0.777228	7.09789e-10	16.7642	1.71383	7.57253
CNN2	3326	3657.52	3642.6	3235.98	3167.51	1836.4	1859.31	1883.83	2.67591e-08	-0.870532	7.04214e-10	-16.7753	0.546945	7.57253
SMARCA1	1672.75	1498.26	1583.91	1779.27	1613.97	2872.36	2934.43	2954.85	2.67591e-08	0.843855	7.04442e-10	16.7749	1.79484	7.57253
NOTCH3	1654.4	1724.24	1709.23	1910.75	1887.41	3183.75	3169.29	3180.93	2.67591e-08	0.841032	7.08378e-10	16.767	1.79133	7.57253
HCMVUS28	5514.97	6274.36	6085.97	5761.39	6002.49	4146.78	3472.32	3846.33	1.24866e-06	-0.635515	1.11944e-07	-10.8433	0.643711	5.90355
ZBTB10	630.472	646.182	678.979	673.73	692.406	329.918	357.537	361.199	3.32256e-08	-0.925191	9.61184e-10	-16.3414	0.526611	7.47853
GRPEL2	836.836	841.411	770.762	831.482	848.23	453.924	410.37	386.286	3.23383e-08	-0.988754	9.19432e-10	-16.4028	0.503913	7.49028
TIMP3	2637.39	2514.44	2461.23	3321.38	2910.78	7173.19	7663.25	8037.81	2.80815e-08	1.46882	7.58833e-10	16.6702	2.76795	7.55158
FKBP9	1215.98	1142.11	1099.36	1323.97	1247.8	2195.77	2322.67	2318.56	2.80815e-08	0.920849	7.58379e-10	16.671	1.89323	7.55158
NDUFA5	589.618	586.486	580.265	634.614	643.212	1032.94	1040.38	1016.87	3.08979e-08	0.764625	8.63114e-10	16.4904	1.69893	7.51007
IL32	284.052	290.005	310.89	334.6	305.522	117.429	123.85	114.88	4.48305e-08	-1.35807	1.42325e-09	-15.8086	0.390105	7.34843
IARS1	3342.4	3381.83	3461.96	3630.68	3637.8	2112.35	2151.43	2228.53	2.90839e-08	-0.689223	7.93152e-10	-16.6082	0.620188	7.53635
MED10	1305.87	1331.34	1425.08	1250.4	1335.74	729.914	713.219	776.921	3.1439e-08	-0.844581	8.91258e-10	-16.4458	0.556873	7.50253
PERP	2064.1	2017.77	2078.35	2136.91	2090.53	3109.44	3329.42	3383.93	2.91973e-08	0.655488	7.98666e-10	16.5985	1.57515	7.53466
TRIM36	229.953	261.282	279.286	248.367	274.298	88.5931	71.3234	73.7891	4.94392e-08	-1.73064	1.61874e-09	-15.6374	0.301319	7.30593
ARID3B	355.618	429.748	401.663	402.682	399.064	158.801	126.152	134.97	4.58292e-08	-1.5111	1.46255e-09	-15.7723	0.350844	7.33886
SQSTM1	3730.73	3768.11	3850.77	4169.9	3949.69	6352.1	6431.06	6670.13	3.11472e-08	0.736672	8.75656e-10	16.4703	1.66633	7.50658
KIAA0930	1002.45	1046.28	1044.1	1044.05	1023.15	1542.71	1583.02	1544.34	3.13651e-08	0.593126	8.86563e-10	16.4532	1.50851	7.50355
MAPK8IP2	715.334	713.129	728.288	666.364	750.493	386.903	383.534	397.273	3.79615e-08	-0.876389	1.12336e-09	-16.1279	0.544729	7.42066
COL14A1	95.0877	82.358	83.8404	117.559	108.075	302.914	302.726	355.824	4.64864e-08	1.72704	1.5105e-09	15.7293	3.31048	7.33267
HCMVUS19	19272.8	20269.7	21019.4	17671.6	19341	12837.2	11952.3	12919.9	9.8025e-07	-0.633086	8.02791e-08	-11.167	0.644796	6.00866
SPTBN2	456.793	481.229	510.209	458.725	497.821	236.787	235.188	241.128	4.22721e-08	-1.01411	1.3175e-09	-15.9122	0.495135	7.37395
BIN1	945.219	962.625	951.33	950.549	964.73	1464.26	1447.86	1403.12	3.25339e-08	0.590396	9.27888e-10	16.3901	1.50566	7.48766
SPTSSA	870.613	809.034	808.231	843.211	782.346	1355.14	1338.69	1438.9	3.30415e-08	0.744009	9.53121e-10	16.3531	1.67482	7.48094
PSME4	2470.79	2411.16	2489.88	2426.92	2326.08	1619.57	1589.93	1578.24	3.25339e-08	-0.603133	9.30387e-10	-16.3864	0.658323	7.48766
AGT	348.534	348.833	364.107	354.477	347.723	620.628	589.431	651.868	4.01865e-08	0.814318	1.21252e-09	16.0242	1.75847	7.39592
CTH	257.471	329.317	294.128	321.815	278.096	87.3039	84.748	78.1759	5.42891e-08	-1.8234	1.82704e-09	-15.4779	0.282555	7.26529
IGFBP2	950.339	952.196	1030.29	949.644	1021.51	572.301	573.736	557.273	3.82108e-08	-0.788314	1.13391e-09	-16.1152	0.57902	7.41781
FASN	3644.9	3647.28	3495.48	3324.57	3370.75	5666.42	6073.13	6273.97	3.42217e-08	0.779873	9.92838e-10	16.2969	1.71698	7.4657
THSD1	300.371	315.26	324.723	289.435	288.328	95.1592	119.932	116.777	5.39873e-08	-1.46373	1.80793e-09	-15.4917	0.362556	7.26771
LINC00963	406.722	389.682	387.816	443.2	397.059	751.799	767.91	706.986	4.0804e-08	0.873762	1.23792e-09	15.9962	1.83243	7.3893
ABCA2	513.007	493.987	538.808	559.998	524.29	907.124	878.424	893.845	3.90653e-08	0.76413	1.16898e-09	16.0738	1.69835	7.40821
SCARA3	2025.27	1912.48	1912.55	1864.03	1860.8	3252.79	2966.07	3125.53	3.43501e-08	0.70142	9.9941e-10	16.2878	1.6261	7.46407
CGN	333.198	347.208	316.743	291.282	332.344	117.05	120.712	133.565	5.44794e-08	-1.38703	1.84247e-09	-15.4669	0.382351	7.26377
APP	8707.03	8368.87	8069.64	9423.02	8626.98	15822.1	15164.9	15542.2	3.90653e-08	0.845969	1.16873e-09	16.0741	1.79747	7.40821
NNT	961.566	929.799	927.642	872.527	919.953	1473.57	1510.72	1624.27	3.71565e-08	0.735392	1.09338e-09	16.1647	1.66485	7.42996
SRF	1454.03	1497.02	1531.65	1460.02	1512.93	948.308	978.182	906.948	3.78536e-08	-0.659001	1.11703e-09	-16.1356	0.633317	7.42189
CXXC5	357.729	352.286	372.003	372.686	350.304	644.314	606.653	671.118	4.32797e-08	0.827369	1.35608e-09	15.8734	1.77445	7.36372
AGO2	2004.82	2009.27	1924.4	2177.79	2081.21	1241.99	1230.45	1166.97	3.71132e-08	-0.748894	1.08903e-09	-16.1702	0.59506	7.43047
SUMF1	291.235	280.237	290.13	306.472	310.424	544.959	542.819	605.476	4.59268e-08	0.931455	1.46948e-09	15.766	1.9072	7.33793
TMCC2	394.454	394.955	377.956	369.522	399.755	185.984	178.395	200.446	5.36551e-08	-1.0431	1.78346e-09	-15.5096	0.485282	7.27039
SLC37A2	300.468	306.82	326.632	333.141	297.214	552.456	584.048	596.975	4.59658e-08	0.886266	1.47834e-09	15.7579	1.84839	7.33757
LOXL1	487.475	579.498	510.179	631.065	575.065	1186.35	1181.92	1149.55	4.11308e-08	1.08116	1.26147e-09	15.9707	2.11574	7.38583
FAM210B	601.9	567.333	650.331	645.739	623.238	1089.05	1038.97	1100.3	4.1084e-08	0.802029	1.25576e-09	15.9768	1.74355	7.38633
AKR1C1	258.585	178.828	173.629	320.155	271.376	1004.95	1009.58	1059.68	4.59658e-08	2.1317	1.47828e-09	15.758	4.38235	7.33757
BRD3	566.108	571.887	548.688	591.334	555.413	1031.92	937.327	936.644	4.15563e-08	0.772552	1.28486e-09	15.9459	1.70829	7.38136
CPNE7	736.768	723.601	765.799	639.544	744.549	1524.97	1362.38	1349.27	4.1084e-08	0.968264	1.25663e-09	15.9759	1.95649	7.38633
NIPSNAP2	502.76	446.624	482.564	468.227	445.199	803.715	801.731	829.895	4.43643e-08	0.793553	1.40477e-09	15.8261	1.73334	7.35297
UTP20	1234.35	1232.93	1272.1	1277.32	1255.72	805.222	809.841	838.251	4.15563e-08	-0.61752	1.28377e-09	-15.9471	0.65179	7.38136
NPTX2	335.204	355.208	391.776	370.406	389.434	702.732	738.086	816.115	4.59837e-08	1.02967	1.48273e-09	15.754	2.04155	7.3374
TTC9	293.252	313.351	305.949	232.754	311.518	69.223	65.3812	59.9774	6.74442e-08	-2.15774	2.40952e-09	-15.1189	0.224107	7.17106
GYPC	807.281	831.445	766.773	889.978	793.492	1659.16	1460.31	1474.68	4.1084e-08	0.904581	1.25227e-09	15.9806	1.872	7.38633
APOBEC3C	1271.15	1199.96	1167.46	1207.81	1230.58	2050.88	1889.17	1907.54	4.01865e-08	0.680808	1.21234e-09	16.0244	1.60304	7.39592
ORMDL2	1250.76	1252.38	1310.55	1153.88	1218.29	582.07	613.725	696.026	4.3827e-08	-0.974983	1.38063e-09	-15.8493	0.508746	7.35826
HS6ST1	1259.93	1230.97	1221.74	1220.74	1255.46	1821.88	1798.85	1865.68	4.0335e-08	0.562915	1.22035e-09	16.0155	1.47725	7.39432
RBP7	391.396	367.246	439.16	303.537	335.063	69.1157	71.2084	60.4694	6.76498e-08	-2.45212	2.45051e-09	-15.0972	0.182742	7.16973
PDCD11	1812.69	1867.16	1985.63	1866.18	1807.87	1149.98	1161.52	1201.08	4.12146e-08	-0.673169	1.26746e-09	-15.9643	0.627128	7.38495
LYAR	894.074	881.83	908.931	809.612	810.984	443.707	467.104	418.531	4.81332e-08	-0.957665	1.57199e-09	-15.6763	0.514889	7.31756
CACNG7	97.1394	108.36	93.7113	99.184	101.947	257.915	236.612	220.759	6.57044e-08	1.25202	2.30924e-09	15.1735	2.38174	7.18241
TNFRSF12A	2606.67	2905.87	2844.19	3041.25	3074.78	1500.84	1646.2	1567.6	4.15652e-08	-0.87959	1.28858e-09	-15.942	0.543522	7.38127
PRKCZ	306.547	287.215	340.491	267.431	308.778	106.53	97.151	97.2413	6.7473e-08	-1.58781	2.42214e-09	-15.1122	0.332676	7.17087
PVR	2260.25	2379.66	2391.23	2352.82	2338.54	1604.34	1556.85	1532.78	4.18214e-08	-0.583252	1.29999e-09	-15.9302	0.667458	7.3786
ATF4	5798.89	6039.79	6019.93	5794.26	6112.66	3853.05	3635.57	3401.4	4.32782e-08	-0.715253	1.35244e-09	-15.877	0.609098	7.36373
SPON2	1503.18	1605.13	1414.15	1779.95	1588.84	3149.43	3001.5	3091.03	4.32958e-08	0.968867	1.36017e-09	15.8693	1.9573	7.36355
DDX21	4350.9	4105.79	4385.69	4002.99	4072.97	2656.81	2705.17	2652.53	4.3827e-08	-0.646087	1.38413e-09	-15.8459	0.639011	7.35826
SLC12A8	133.898	136.945	142.091	119.153	116.589	309.897	292.056	285.271	6.61189e-08	1.19119	2.34573e-09	15.1533	2.28341	7.17967
COL11A1	480.307	427.503	448.006	524.508	480.421	920.387	898.707	865.966	5.06099e-08	0.926301	1.66966e-09	15.5965	1.9004	7.29576
BMS1	2057.94	2024.04	2129.69	2115.49	2030.52	1388.17	1406.32	1392.59	4.55385e-08	-0.569382	1.4495e-09	-15.7842	0.673906	7.34162
CIT	681.542	687.692	659.235	631.197	639.823	1033.89	1092.42	1071.44	4.9651e-08	0.69285	1.62979e-09	15.6284	1.61647	7.30407
TTYH3	3396.59	3487.73	3205.34	3523.86	3292.55	5681.1	5273.31	5442.76	4.60004e-08	0.693051	1.48708e-09	15.7501	1.6167	7.33724
TMEM109	874.684	902.43	836.861	957.753	945.207	1503.33	1485.51	1527.25	4.71756e-08	0.738171	1.53681e-09	15.7063	1.66806	7.32628
ZNF778	409.713	456.811	431.296	402.85	439.83	212.87	205.932	192.401	6.68633e-08	-1.07105	2.38322e-09	-15.133	0.475974	7.17481
FAM126B	705.095	688.215	668.093	724.589	760.121	392.757	361.183	383.033	5.90606e-08	-0.904352	2.0072e-09	-15.3551	0.534273	7.2287
PXMP4	146.153	158.613	154.924	141.766	165.029	303.103	313.327	311.321	6.92023e-08	1.01461	2.51249e-09	15.0652	2.02036	7.15988
ZNF362	317.804	292.26	282.223	324.616	313.765	602.227	594.945	547.731	6.03318e-08	0.927108	2.0604e-09	15.321	1.90146	7.21945
PCDHGA12	80.772	86.0134	75.955	81.0911	71.8397	253.128	198.43	247.823	7.65631e-08	1.55301	2.90031e-09	14.8826	2.93429	7.11598
NEK6	585.522	593.461	587.18	553.122	518.322	968.498	957.054	1008.77	5.39873e-08	0.786866	1.80462e-09	15.4941	1.72532	7.26771
ARFGEF3	447.622	481.95	502.3	399.618	446.838	165.724	183.467	162.313	7.08103e-08	-1.41678	2.59434e-09	-15.0243	0.374548	7.1499
FEZ2	721.403	690.144	673.042	701.341	651.757	1085.84	1093.12	1141.21	5.27249e-08	0.686843	1.74817e-09	15.5359	1.60976	7.27798
LINC00662	436.271	460.223	436.227	459.298	465.678	250.259	236.461	246.101	6.74504e-08	-0.885725	2.41533e-09	-15.1158	0.541215	7.17102
OSER1	970.748	956.662	992.795	928.973	1020.81	545.93	575.897	597.702	5.61997e-08	-0.765613	1.90531e-09	-15.423	0.588203	7.25027
UAP1	1743.22	1760.92	1870.15	1766.5	1664.1	1073.3	1111.91	1110.44	5.06871e-08	-0.680147	1.67641e-09	-15.5911	0.624102	7.2951
BTD	368.921	349.086	358.208	401.596	372.977	649.84	659.188	632.428	6.09936e-08	0.807545	2.09817e-09	15.2974	1.75023	7.21472
NUP88	1492.91	1458.71	1487.21	1337.56	1349.09	797.576	835.685	832.728	5.38388e-08	-0.792397	1.79403e-09	-15.5019	0.577384	7.2689
HIVEP3	464.916	479.816	455.945	529.368	443.797	201.106	214.248	179.428	7.14981e-08	-1.26254	2.63732e-09	-15.0033	0.416809	7.14571
SLC35B2	1823.99	1863.33	1828.66	1758.38	1841.92	2687.15	2693.36	2860.07	5.06099e-08	0.59104	1.66589e-09	15.5995	1.50633	7.29576
FARP1	1654.34	1720.31	1621.43	1550.7	1658.91	1053.22	1037.86	1045.61	5.40607e-08	-0.649535	1.81487e-09	-15.4867	0.637486	7.26712
DAAM1	760.239	803.273	795.43	732.5	751.626	407.922	452.639	431.856	6.39214e-08	-0.836502	2.22008e-09	-15.2243	0.56	7.19435
RECK	508.889	495.903	496.382	526.361	508.114	798.654	803.027	850.971	6.09936e-08	0.688041	2.09379e-09	15.3002	1.61109	7.21472
SERPINH1	4568.63	4759.39	4647.17	4912.75	4599.75	7382.4	7038	7518.36	5.43744e-08	0.638537	1.83442e-09	15.4727	1.55675	7.26461
DSC2	190.097	219.059	237.845	201.623	204.55	68.5751	56.1703	49.8207	9.33398e-08	-1.86937	3.77568e-09	-14.5521	0.273692	7.02993
HCMVUS20	21054.9	21319.6	21698.4	19011.1	20760	13363.5	13095.5	13894.4	3.76885e-07	-0.625618	2.30555e-08	-12.4554	0.648142	6.42379
JMJD6	1071.9	1065.46	1174.4	1002.61	1100.83	612.535	604.94	602.435	6.22351e-08	-0.833681	2.14604e-09	-15.2682	0.561096	7.20596
ARID3A	877.771	876.387	868.439	919.505	919.26	495.82	554.811	490.91	6.43738e-08	-0.79811	2.2518e-09	-15.206	0.575102	7.19129
ETV4	1042.24	1036.25	941.479	972.415	984.736	549.606	599.173	578.027	6.35987e-08	-0.790057	2.19833e-09	-15.237	0.578321	7.19655
IGF2BP2	1726.89	1883.39	1755.65	1749.91	1683.77	1114.7	1085.97	1028.07	5.95629e-08	-0.709894	2.02921e-09	-15.3409	0.611365	7.22502
SLC1A4	712.224	881.081	860.577	861.765	833.494	363.47	340.13	378.384	7.08103e-08	-1.1992	2.59275e-09	-15.025	0.435517	7.1499
JAG2	300.475	289.495	327.622	289.736	312.745	140.819	122.812	136.136	8.95502e-08	-1.19017	3.55558e-09	-14.6267	0.438251	7.04793
HFE	204.388	156.625	189.457	218.988	172.534	438.867	466.002	484.034	7.90075e-08	1.30514	3.01669e-09	14.8328	2.47108	7.10233
PFKFB4	477.263	480.098	500.308	506.161	497.521	822.813	808.482	763.404	6.74948e-08	0.697157	2.43371e-09	15.106	1.62131	7.17073
RNF149	1300.86	1298.82	1440.81	1372.92	1366.13	819.604	778.016	840.873	6.43738e-08	-0.737913	2.25171e-09	-15.2061	0.599606	7.19129
ETV1	623.358	612.232	604.925	700.339	601.669	1060.18	1099.77	1075.4	6.57352e-08	0.781535	2.32183e-09	15.1665	1.71896	7.1822
CARD10	388.3	423.68	397.713	424.385	466.366	171.008	189.802	184.351	8.65443e-08	-1.20782	3.39033e-09	-14.6861	0.432923	7.06276
ADGRG6	586.484	520.31	601.04	502.264	529.021	173.734	212.126	225.038	8.42972e-08	-1.43099	3.26197e-09	-14.7345	0.370876	7.07419
PRDX3	2201.01	2142.11	2187.9	2104.88	2123.25	3083.75	3219.84	3318.09	6.06899e-08	0.575351	2.07766e-09	15.3102	1.49004	7.21688
TDG	812.341	815.346	853.662	827.015	809.319	507.602	532.723	503.356	7.22633e-08	-0.679147	2.67154e-09	-14.9869	0.624534	7.14108
ZMYM3	647.875	663.22	631.575	699.478	701.596	1111.19	1096.5	1056.19	6.7473e-08	0.702554	2.42733e-09	15.1094	1.62738	7.17087
PRKAR1A	3581.52	3388.55	3295.15	3724.87	3423.38	5597.62	5517.27	5667.85	6.40414e-08	0.685012	2.22956e-09	15.2188	1.60772	7.19354
OBSL1	903.33	873.672	904.943	869.078	918.25	1312.26	1340.01	1373.13	6.57352e-08	0.585629	2.31871e-09	15.1683	1.50069	7.1822
SMPD1	1386.63	1476.12	1306.61	1484.98	1455.07	2379.21	2284.64	2290.37	6.36429e-08	0.706846	2.20513e-09	15.233	1.63223	7.19625
GALC	394.437	347.45	380.921	414.727	354.1	759.087	702.988	694.729	7.50694e-08	0.928609	2.83751e-09	14.9103	1.90344	7.12454
LRP3	620.29	673.606	620.719	578.08	624.946	1095.45	1019.68	1120.08	6.9537e-08	0.790803	2.5304e-09	15.0561	1.73004	7.15778
PPP1R15B	1330.4	1403.82	1322.42	1440.16	1378.7	884.619	885.051	855.444	6.76498e-08	-0.651527	2.445e-09	-15.1001	0.636606	7.16973
IQCE	497.645	513.25	462.826	504.716	475.408	818.991	812.562	783.069	7.38223e-08	0.713769	2.75977e-09	14.9455	1.64008	7.13181
ANKRD33B	403.59	402.219	399.703	381.105	414.768	194.861	203.917	221.367	9.1523e-08	-0.954127	3.67943e-09	-14.5841	0.516154	7.03847
ITGB1	8263.55	8103.23	8143.67	8719.1	7837.52	12987.4	12842.3	13195.7	7.02033e-08	0.664262	2.56047e-09	15.041	1.58476	7.15364
PRSS23	1473.5	1429.31	1411.21	1615.64	1583.99	2483.84	2621.05	2741.4	6.57352e-08	0.800263	2.32667e-09	15.1638	1.74142	7.1822
NOLC1	2031.37	2283.05	2085.28	2203	2181.99	1336.6	1383.85	1336.8	6.64988e-08	-0.672404	2.36472e-09	-15.143	0.62746	7.17719
CLIC6	172.679	179.561	207.278	168.898	198.08	59.4105	56.3673	63.9537	1.14262e-07	-1.62195	5.01979e-09	-14.2026	0.324897	6.9421
SGSM2	642.752	614.915	636.518	644.926	654.309	1119.46	1125.45	993.443	7.23052e-08	0.75499	2.67908e-09	14.9833	1.68762	7.14083
ARRB1	449.641	439.724	476.644	436.138	435.737	719.647	767.948	729.846	7.87917e-08	0.72267	2.9978e-09	14.8408	1.65023	7.10352
HOMER2	355.612	350.152	368.103	341.908	393.932	168.886	179.229	165.717	9.87102e-08	-1.0769	4.09929e-09	-14.4504	0.474046	7.00564
MYADM	1768.77	1935.31	1752.7	1881.73	1881.84	1076.14	1014.07	888.468	7.09277e-08	-0.897013	2.60452e-09	-15.0193	0.536997	7.14918
NDN	631.517	622.687	641.453	603.29	642.243	953.522	949.702	974.14	7.49142e-08	0.610799	2.81922e-09	14.9185	1.5271	7.12544
ABAT	295.286	283.92	271.395	300.647	264.018	107.34	129.825	111.845	1.077e-07	-1.2827	4.59759e-09	-14.3096	0.411025	6.96779
ARMCX1	848.11	790.185	776.661	868.523	812.648	1297.63	1282.46	1338.75	7.34585e-08	0.674526	2.74008e-09	14.9546	1.59607	7.13396
ARHGEF16	282.044	292.384	302.971	290.878	277.652	148.946	138.956	140.645	1.07453e-07	-1.01611	4.56924e-09	-14.3172	0.494447	6.96878
TBX5-AS1	345.4	337.144	300.968	367.048	337.792	605.224	628.861	654.114	8.65443e-08	0.90015	3.39319e-09	14.6851	1.86626	7.06276
CCN1	1811.63	1832.86	1689.56	1840.42	1827.91	1100.09	919.205	924.201	7.3884e-08	-0.880239	2.7682e-09	-14.9417	0.543277	7.13145
PLS3	1748.36	1720.17	1701.36	1838.23	1687.16	2636.78	2649.67	2862.64	7.11274e-08	0.643117	2.61775e-09	15.0128	1.5617	7.14796
ENSG00000173727	94.0631	75.4312	102.608	101.891	75.1797	247.573	243.386	241.872	1.12271e-07	1.45546	4.92303e-09	14.2263	2.74243	6.94973
EHD3	328.061	312.78	300.957	396.412	325.573	736.361	705.876	667.626	8.83086e-08	1.08512	3.477e-09	14.6546	2.12155	7.054
KBTBD8	321.886	320.868	361.208	315.988	322.453	143.118	161.451	147.181	1.08715e-07	-1.12789	4.69498e-09	-14.284	0.457585	6.96371
SMAD3	1466.36	1443.06	1381.6	1612.97	1456.54	2356.75	2446.82	2402.49	7.27698e-08	0.708209	2.70836e-09	14.9694	1.63377	7.13805
ARL6IP1	1762.7	1718.17	1834.57	1768.65	1831.46	2582.83	2607.54	2687.81	7.27541e-08	0.558805	2.70174e-09	14.9726	1.47305	7.13814
TIMELESS	1105.61	1128.48	1054.96	1048.51	1006.06	1648.61	1665.01	1721.1	7.46208e-08	0.65236	2.80199e-09	14.9263	1.57174	7.12714
TMEM119	251.417	210.921	187.456	292.502	261.151	947.758	728.035	768.326	9.16767e-08	1.7669	3.69321e-09	14.5795	3.40321	7.03774
CDS1	313.731	302.607	316.778	240.345	277.506	75.5983	81.172	89.9169	1.23582e-07	-1.81747	5.47023e-09	-14.0987	0.283718	6.90804
BYSL	740.783	730.089	738.206	729.292	752.775	428.284	439.082	477.403	8.95502e-08	-0.720776	3.55235e-09	-14.6279	0.606771	7.04793
EBF3	175.752	200.35	172.705	181.918	189.334	73.8107	64.9922	59.0522	1.33272e-07	-1.48912	5.94332e-09	-13.999	0.356229	6.87526
SUCLG2	707.108	690.973	680.935	664.009	702.559	1021.07	1046.55	1053.08	8.15173e-08	0.594584	3.12852e-09	14.787	1.51004	7.08875
PDGFA	335.188	352.739	326.64	318.45	336.104	166.724	176.565	169.324	1.09053e-07	-0.967152	4.733e-09	-14.2742	0.511515	6.96236
CAVIN3	322.935	344.046	345.388	394.817	385.221	709.655	662.041	730.856	8.99571e-08	0.96947	3.59411e-09	14.6133	1.95812	7.04596
APOE	1802.57	1932.97	2044.78	1806.65	1911.34	3075	3009.99	3231.6	7.49325e-08	0.709996	2.82612e-09	14.9154	1.6358	7.12533
TUFT1	404.592	456.055	445.127	436.85	388.108	194.952	200.043	203.383	1.07453e-07	-1.09243	4.56395e-09	-14.3186	0.468971	6.96878
TRIM65	250.376	219.684	241.763	252.665	259.568	455.755	450.455	443.272	9.94876e-08	0.87924	4.13982e-09	14.4383	1.83941	7.00223
CREB3L1	1179.22	1135.98	1120.08	1326.48	1200.37	2168.85	2004.6	2043.47	7.68297e-08	0.798937	2.91678e-09	14.8754	1.73982	7.11447
PRXL2A	1087.24	937.499	973.036	939.202	945.707	1600.21	1649.35	1712.16	7.90075e-08	0.761731	3.02421e-09	14.8297	1.69552	7.10233
PCK2	969.708	1086.36	1084.6	1211.75	1180.25	540.291	517.804	519.774	8.87381e-08	-1.06911	3.50127e-09	-14.6459	0.476614	7.05189
TOP2A	3117.62	2847.55	2981.33	2717.64	2678.48	4804.24	4833.63	5054.76	7.90075e-08	0.773792	3.02565e-09	14.8291	1.70976	7.10233
AKR1B1	4654.5	4544.27	4576.09	6051.27	5410.59	12268.3	13445.4	14616.9	8.48677e-08	1.41926	3.29932e-09	14.7202	2.67448	7.07126
CNPY4	198.274	204.239	217.096	207.605	203.583	400.096	359.71	403.585	1.08016e-07	0.911725	4.62006e-09	14.3037	1.88129	6.96651
PHF8	732.661	823.121	741.14	790.589	798.983	453.799	434.069	413.789	9.6338e-08	-0.840489	3.92092e-09	-14.5053	0.558454	7.0162
MMP15	402.681	422.271	478.607	401.321	412.336	188.632	196.665	196.495	1.14353e-07	-1.12487	5.03327e-09	-14.1994	0.458542	6.94175
RAPGEF2	1346.75	1330.42	1352.03	1310.15	1347.72	919.752	906.233	932.311	8.62222e-08	-0.540478	3.36627e-09	-14.6951	0.687543	7.06438
CCDC186	740.847	770.315	757.912	721.127	764.437	467.338	411.476	410.079	9.73822e-08	-0.808461	4.01992e-09	-14.4745	0.570991	7.01152
ZCCHC24	824.643	849.622	811.191	942.904	869.308	1526.58	1391.61	1525.42	8.50825e-08	0.785807	3.31472e-09	14.7144	1.72406	7.07016
TCEA2	580.421	564.896	564.475	573.044	577.747	887.867	848.076	858.493	9.13276e-08	0.595893	3.664e-09	14.5894	1.51141	7.0394
RMC1	1053.51	1051.62	1068.79	981.798	1009.54	634.023	664.449	652.251	9.10741e-08	-0.667201	3.64628e-09	-14.5954	0.629727	7.04061
CCNJ	738.767	747.217	754.972	747.36	737.959	446.779	488.563	465.707	9.71633e-08	-0.675194	3.98053e-09	-14.4867	0.626248	7.0125
PC	517.126	581.039	598.995	639.54	580.911	1034.66	1152.26	1184.31	8.96409e-08	0.945971	3.57279e-09	14.6207	1.92648	7.04749
PIK3C2A	2755.93	2721.47	3007.97	2568.62	2638.86	1657.79	1659.41	1664.53	8.22881e-08	-0.719712	3.16493e-09	-14.7724	0.607219	7.08466
AASS	543.622	488.114	553.637	520.305	545.193	279.101	283.513	250.114	1.08148e-07	-0.969454	4.63467e-09	-14.2998	0.510699	6.96598
SEC23B	1800.47	1857.4	1782.29	1845.14	1755.12	1236.34	1210.06	1255.82	8.42972e-08	-0.550729	3.26316e-09	-14.734	0.682675	7.07419
EMB	259.501	258.215	232.914	257.431	242.695	109.701	120.787	111.532	1.34144e-07	-1.13046	6.01555e-09	-13.9845	0.456771	6.87243
MXD3	74.6483	75.5741	88.797	74.9865	87.4806	189.302	226.445	236.752	1.35874e-07	1.43814	6.11569e-09	13.9648	2.7097	6.86686
CDK2AP1	2643.47	2534.58	2500.73	2432.09	2416.39	3734.47	3796.81	3708.91	8.36014e-08	0.581367	3.22237e-09	14.7498	1.49627	7.07779
GCLM	968.667	931.83	1055.99	884.951	1037.42	512.443	485.511	510.317	9.71633e-08	-0.954014	4.00283e-09	-14.4798	0.516194	7.0125
PIK3CB	1102.59	1092.81	1113.18	1135.84	1121.2	728.311	762.595	707.658	9.19047e-08	-0.603795	3.71001e-09	-14.5738	0.658021	7.03666
LINC00641	290.15	338.775	330.655	288.63	289.263	131.24	121.988	115.631	1.34253e-07	-1.32129	6.03158e-09	-13.9813	0.400176	6.87208
SLC38A1	3565.15	3496.59	3508.34	3473.86	3491.51	2305.55	2437.28	2486.75	8.46626e-08	-0.541962	3.28432e-09	-14.7259	0.686836	7.07231
FMNL1	348.494	366.372	339.451	422.416	368.651	680.736	722.95	685.514	1.02991e-07	0.920828	4.30628e-09	14.3898	1.8932	6.9872
POLR2M	308.593	320.962	303.952	316.917	316.482	501.667	514.837	539.361	1.08506e-07	0.72649	4.67641e-09	14.2889	1.65461	6.96455
SLC39A6	1516.39	1415.61	1472.41	1552.51	1424.88	2330.96	2239.4	2204.2	8.76786e-08	0.613757	3.44493e-09	14.6662	1.53024	7.05711
MAP1LC3A	718.39	804.757	845.747	727.097	870.261	376.914	372.343	363.119	1.08506e-07	-1.09492	4.67697e-09	-14.2887	0.468162	6.96455
TTC3	1975.21	1908.14	1927.35	1948.04	1760.1	2970.5	2886	3060.01	8.89536e-08	0.643464	3.51715e-09	14.6403	1.56208	7.05084
RASSF1	752.048	769.679	767.802	749.949	827.568	459.683	449.463	478.319	1.05708e-07	-0.741846	4.46877e-09	-14.3444	0.597974	6.97589
AJUBA	1001.36	1094.28	1052.04	1017.62	1045.16	526.775	587.416	632.291	1.01294e-07	-0.842832	4.22339e-09	-14.4137	0.557548	6.99442
APMAP	1683.97	1479.38	1591.82	1593.11	1710.5	2590.59	2760.55	2907.05	8.96409e-08	0.772553	3.57404e-09	14.6203	1.70829	7.04749
ERGIC1	3306.67	3395.43	3115.53	3407.84	3361.41	5201.7	4890.49	5193.65	9.38921e-08	0.61926	3.80581e-09	14.5422	1.53609	7.02737
CHAC1	644.714	784.11	768.843	965.858	886.87	190.921	194.857	161.234	1.33746e-07	-2.14284	5.97557e-09	-13.9925	0.226434	6.87372
SPARC	6320.01	6044.89	6075.19	6416.84	6226.96	9131.14	9316.45	9809.2	9.85024e-08	0.599127	4.08249e-09	14.4555	1.5148	7.00655
PAWR	688.685	678.236	695.766	615.648	664.888	380.212	338.392	373.314	1.16286e-07	-0.876851	5.12799e-09	-14.1768	0.544555	6.93447
P4HA1	2003.87	1964.82	2111.88	2258.74	2008.48	3366.05	3262.58	3419.35	9.46544e-08	0.696287	3.84455e-09	14.5297	1.62033	7.02386
IRF2BP2	541.607	575.245	537.822	603.384	578.584	898.556	900.376	914.404	1.06208e-07	0.673941	4.49871e-09	14.3362	1.59542	6.97384
VDR	262.621	246.584	209.186	292.711	256.156	549.985	561.026	535.383	1.23582e-07	1.12136	5.47007e-09	14.0987	2.17552	6.90804
DAZAP1	3131.91	3423.33	3229.06	2970.68	3053.7	2007.93	1936.92	1858.92	9.65374e-08	-0.70749	3.93703e-09	-14.5003	0.612384	7.0153
SARS1	3470.12	3461.22	3610	3630.66	3605.09	2522.43	2367.32	2389.7	9.71412e-08	-0.551335	3.96971e-09	-14.49	0.682388	7.0126
CRTAP	2169.38	2182.43	2163.21	2437.31	2338.98	3893.5	3542.53	3824.13	9.71633e-08	0.73339	3.99717e-09	14.4815	1.66254	7.0125
ELOVL7	236.083	251.73	265.463	216.18	275.141	73.5056	91.2001	70.1707	1.69826e-07	-1.67742	8.19285e-09	-13.6191	0.31264	6.77
BNIP3L	2020.21	1879.45	1952	2030.13	1771.95	3193.08	3087.21	3061.84	9.71633e-08	0.691439	3.98887e-09	14.4841	1.61489	7.0125
STAC	263.628	251.015	268.438	227.604	240.727	85.7777	105.911	100.402	1.65007e-07	-1.36199	7.86807e-09	-13.6664	0.389044	6.7825
STX12	1270.16	1339.68	1252.33	1355	1361.26	833.501	859.622	851.494	1.0485e-07	-0.632558	4.4151e-09	-14.3592	0.645032	6.97943
AARS1	3511.01	3529.32	3601.11	3735.39	3671.26	2470.8	2509.16	2541.17	9.75008e-08	-0.525456	4.0329e-09	-14.4705	0.694739	7.01099
NDRG1	5117.39	5065.35	5055.71	5671.02	4942.61	8641.04	8241.07	8397.57	1.02991e-07	0.706102	4.31121e-09	14.3884	1.63139	6.9872
POGLUT3	902.256	809.17	836.867	904.051	843.631	1321.22	1412.9	1412.04	1.04314e-07	0.686347	4.38387e-09	14.3679	1.6092	6.98166
COL4A5	720.413	703.784	645.388	807.825	746.331	1272.53	1427.65	1367.09	1.07575e-07	0.905449	4.58336e-09	14.3134	1.87313	6.96829
SRD5A1	215.633	215.501	224.994	218.906	219.131	372.553	386.441	419.979	1.41198e-07	0.84193	6.43725e-09	13.9036	1.79245	6.85017
SLC27A6	158.404	173.388	175.668	146.16	156.4	59.3666	61.6464	55.4074	1.91316e-07	-1.45258	9.6859e-09	-13.4246	0.365368	6.71825
LAPTM4B	2162.18	1959.1	2206.65	1985.32	2087.11	3287.18	3467.69	3716.45	1.04314e-07	0.746356	4.3795e-09	14.3691	1.67755	6.98166
NPAS1	186.952	203.143	174.694	156.755	191.238	62.3448	61.0898	60.9841	1.90769e-07	-1.56584	9.63015e-09	-13.4312	0.337781	6.71949
RASL12	157.402	133.325	141.089	177.361	166.623	337.353	336.763	353.867	1.54127e-07	1.14807	7.24386e-09	13.7637	2.21617	6.81212
FLOT1	3326.06	3557.84	3534	3035.55	3294.48	2046.45	2030.54	1969.61	1.049e-07	-0.730611	4.4259e-09	-14.3562	0.602649	6.97922
RMI2	156.352	143.896	146.041	161.863	172.017	300.435	302.848	310.453	1.55995e-07	0.967823	7.37043e-09	13.7433	1.95589	6.80689
FLNC	9458.05	9903.05	9547.02	9602.36	9444.14	5768.9	6243.46	6489.98	1.09226e-07	-0.638494	4.76233e-09	-14.2667	0.642383	6.96167
ATP9A	1107.68	1063.55	1014.49	1120.32	1073.95	1628.04	1592.28	1684.92	1.08361e-07	0.604166	4.65275e-09	14.2951	1.5201	6.96513
RABGAP1	1030	979.123	979.96	1023.45	999.258	1530.56	1430.33	1488.89	1.09053e-07	0.565173	4.73233e-09	14.2744	1.47957	6.96236
SNED1	180.92	181.672	169.703	216.269	203.548	463.62	415.725	392.994	1.50364e-07	1.15699	7.01716e-09	13.8013	2.22992	6.82286
CTNNAL1	1717.72	1759.77	1887.89	1625	1604.46	951.297	1005.18	1009.88	1.11141e-07	-0.796093	4.86424e-09	-14.2409	0.575907	6.95413
TAGLN	427.02	460.636	454.034	460.555	530.067	179.266	179.612	216.962	1.57415e-07	-1.285	7.46365e-09	-13.7284	0.410372	6.80295
OSBP	1905.76	2062.5	2047.74	2062.27	1961.31	1341.18	1319.24	1370.95	1.09053e-07	-0.57922	4.73673e-09	-14.2732	0.669325	6.96236
LDLR	1481.66	1310.22	1272.06	1261.29	1220.85	2333.61	2215.35	2450.05	1.09171e-07	0.83554	4.75091e-09	14.2696	1.78452	6.96189
CHST15	229.927	274.476	293.127	253.748	247.684	101.633	87.9934	84.7343	1.87532e-07	-1.50678	9.40457e-09	-13.4586	0.351896	6.72693
GART	2355.3	2377.75	2363.58	2237.42	2200.68	1519.63	1512.34	1588.85	1.10877e-07	-0.582573	4.84351e-09	-14.2461	0.667772	6.95516
MFAP2	560.007	588.131	540.777	511.367	526.816	1203.55	979.599	1029.62	1.25e-07	0.969383	5.54337e-09	14.0827	1.958	6.90309
PTPRE	130.857	152.421	126.279	168.666	148.469	345.404	312.65	330.099	1.70048e-07	1.18731	8.21768e-09	13.6155	2.27727	6.76943
DUSP8	289.189	363.455	329.628	374.375	384.786	115.87	88.5261	103.261	1.89754e-07	-1.76518	9.56319e-09	-13.4393	0.294191	6.72181
ACAD10	349.506	351.736	333.535	331.333	324.744	540.631	541.093	556.61	1.45705e-07	0.692073	6.75141e-09	13.847	1.6156	6.83653
NPHP4	265.695	265.581	259.532	294.381	274.231	457.852	499.802	474.76	1.52347e-07	0.812233	7.13494e-09	13.7816	1.75593	6.81717
ENSG00000250899	292.182	272.882	261.541	306.987	313.561	121.184	126.708	109.023	1.88077e-07	-1.28273	9.44748e-09	-13.4534	0.411016	6.72567
MCTP1	280.002	230.008	281.245	310.821	252.574	585.416	543.488	585.439	1.50364e-07	1.08298	7.00862e-09	13.8027	2.1184	6.82286
CCBE1	375.011	359.687	337.497	379.248	365.442	597.448	585.084	608.928	1.44049e-07	0.71745	6.64871e-09	13.8652	1.64427	6.84149
KDM6B	789.868	848.18	836.882	938.907	902.362	456.663	455.247	396.957	1.41599e-07	-0.98496	6.49072e-09	-13.8938	0.50524	6.84894
C21orf58	158.395	176.04	156.903	158.368	140.824	314.966	320.335	301.808	1.73567e-07	0.98519	8.54515e-09	13.5699	1.97957	6.76053
KLF7	894.119	905.746	895.087	846.661	826.24	530.211	557.44	528.121	1.39416e-07	-0.697085	6.30979e-09	-13.9275	0.616817	6.85569
PSAT1	1065.72	1168.59	1055.98	1158.11	1182.12	671.642	686.046	680.975	1.3382e-07	-0.7272	5.98994e-09	-13.9896	0.604075	6.87348
NUDT16	1235.4	1301.83	1236.55	1172.27	1237.45	811.456	811.565	772.516	1.3054e-07	-0.630361	5.79985e-09	-14.0283	0.646015	6.88426
FADS3	1066.8	1110.32	1095.43	953.159	1099.92	589.554	593.641	520.738	1.39625e-07	-0.906499	6.34236e-09	-13.9213	0.533478	6.85504
MEIOC	390.343	352.71	360.202	324.506	336.077	161.674	123.502	130.155	1.91316e-07	-1.35893	9.68951e-09	-13.4241	0.389871	6.71825
ABCB1	199.23	186.421	206.279	201.077	204.903	80.2979	78.3222	95.4618	2.152e-07	-1.24138	1.12202e-08	-13.2557	0.422966	6.66716
CPE	905.41	961.53	971.049	898.342	965.363	1402.51	1384.05	1405.01	1.31045e-07	0.572277	5.83315e-09	14.0214	1.48687	6.88258
FMOD	225.871	201.485	179.567	222.231	206.018	437.625	395.621	418.891	1.73567e-07	1.01517	8.54601e-09	13.5698	2.02114	6.76053
C11orf96	186.039	183.327	135.145	212.698	197.412	471.044	512.738	459.221	1.76614e-07	1.40681	8.71067e-09	13.5476	2.65151	6.75297
CDON	149.236	133.322	119.367	115.552	143.269	312.655	281.01	326.324	1.94492e-07	1.21675	9.86648e-09	13.4033	2.32422	6.7111
SLC43A2	512.993	507.048	559.55	573.147	566.642	248.178	296.661	269.257	1.73567e-07	-1.00529	8.52197e-09	-13.5731	0.498171	6.76053
CAPN5	706.103	734.945	675.991	747.176	632.681	1213.87	1180.68	1134.44	1.42575e-07	0.751762	6.54729e-09	13.8835	1.68385	6.84596
PEX2	323.946	341.516	352.306	363.62	341.288	570.08	619.105	562.342	1.65007e-07	0.760808	7.87832e-09	13.6649	1.69444	6.7825
LAMA2	208.436	182.822	168.739	194.816	193.484	358.594	357.137	363.304	1.87335e-07	0.927786	9.37915e-09	13.4618	1.90235	6.72738
HS2ST1	743.915	696.841	719.412	785.247	772.14	1133.85	1165.05	1180.93	1.42836e-07	0.642981	6.57112e-09	13.8791	1.56155	6.84516
RCCD1	145.137	150.77	154.922	155.688	152.882	268.811	295.004	275.602	1.99439e-07	0.879337	1.02166e-08	13.3631	1.83953	6.70019
ANGPTL2	1046.39	950.345	956.247	1116.77	1085.05	1949.59	1719.58	1899.47	1.39276e-07	0.848948	6.29188e-09	13.9309	1.80119	6.85613
KNDC1	93.0366	83.2853	90.7605	94.9543	92.5516	183.477	182.714	183.542	2.26398e-07	1.01125	1.1973e-08	13.1818	2.01565	6.64513
C5orf24	951.351	986.793	994.756	1009.48	1018.1	1406.83	1437.2	1433.69	1.41599e-07	0.523764	6.47977e-09	13.8958	1.4377	6.84894
DCP2	956.411	937.861	1012.55	991.6	963.315	552.581	636.385	573.382	1.55953e-07	-0.729229	7.35553e-09	-13.7456	0.603226	6.80701
ATP2B4	2471.83	2328.22	2383.28	2295.15	2221.88	3441.36	3501.86	3671.95	1.37564e-07	0.596866	6.20315e-09	13.9478	1.51243	6.8615
AR	104.263	105.02	105.574	108.907	102.945	195.116	215.155	209.395	2.24372e-07	0.970706	1.18472e-08	13.1938	1.9598	6.64903
TUBB6	6105.39	6289.42	6306.15	5474.88	5725.8	3777.47	3634.54	3656.89	1.41208e-07	-0.694756	6.44942e-09	-13.9014	0.617814	6.85014
EMC10	2093.77	2117.68	2186.89	2229.38	2192.69	3052.08	3043.67	3089.48	1.39625e-07	0.500996	6.33894e-09	13.922	1.41519	6.85504
OAZ2	1681.94	1639.92	1729	1801.02	1750.04	2511.58	2579.14	2741.68	1.39664e-07	0.60155	6.35572e-09	13.9188	1.51735	6.85492
AKR7A2	426.125	429.49	421.38	424.124	397.08	636.007	672.955	675.093	1.70361e-07	0.657422	8.24692e-09	13.6114	1.57726	6.76863
SRP54	1899.6	1926.31	1838.53	1949.83	1959.78	1362.89	1297.05	1320.32	1.45637e-07	-0.529462	6.73621e-09	-13.8497	0.692813	6.83673
HEXIM1	1444.86	1365.62	1356.94	1478.94	1439.61	2201.55	2073.76	2083.95	1.44049e-07	0.581204	6.6508e-09	13.8648	1.4961	6.84149
PBX1	375.058	304.936	314.771	412.821	359.127	718.7	788.53	815.73	1.7288e-07	1.13788	8.42617e-09	13.5863	2.20057	6.76226
ADI1	1176.14	1192.16	1250.37	1095.98	1124.67	1791.25	1883.11	1992.12	1.46746e-07	0.69358	6.81181e-09	13.8364	1.61729	6.83343
SCARB2	4356.08	4171.86	3856.68	4710.23	4324.63	7172.54	7578.68	7607.22	1.52011e-07	0.801506	7.1066e-09	13.7863	1.74292	6.81813
GALNT11	544.631	514.112	504.283	547.238	500.402	814.662	861.042	919.458	1.67556e-07	0.7271	8.06944e-09	13.6368	1.65531	6.77584
CHMP7	781.69	781.656	780.62	816.603	790.368	1150.84	1115.9	1173.79	1.57185e-07	0.537019	7.43972e-09	13.7322	1.45097	6.80359
CYB5D2	249.359	250.843	238.799	245.686	228.454	450.582	412.261	485.02	1.95894e-07	0.885304	9.98632e-09	13.3893	1.84715	6.70798
MARCHF4	505.602	471.235	462.936	429.393	410.937	210.41	220.429	209.295	2.0932e-07	-1.09357	1.08963e-08	-13.2892	0.468601	6.67919
SZRD1	3021.56	2887.35	2977.39	2880.58	2871.3	4138.89	4079.88	4263.52	1.49311e-07	0.507197	6.94326e-09	13.8138	1.42129	6.82591
TMEM43	1105.62	1048.1	1064.83	1141.22	1117.95	1584.61	1642.3	1712.44	1.53247e-07	0.587741	7.18979e-09	13.7725	1.50289	6.81461
BUD23	1536.87	1569.93	1681.63	1556.64	1682	1042.32	1070.04	1038.79	1.55953e-07	-0.611402	7.35459e-09	-13.7458	0.65456	6.80701
MR1	193.154	216.48	197.358	229.46	226.163	407.81	384.336	414.626	2.07969e-07	0.921707	1.08087e-08	13.2985	1.89436	6.682
NIPSNAP1	935.01	941.847	992.779	993.844	967.264	1403.85	1435.74	1539.28	1.57613e-07	0.594768	7.48608e-09	13.7249	1.51023	6.80241
PKNOX1	529.329	542.545	510.201	502.041	549.457	267.584	311.953	293.371	2.01419e-07	-0.858505	1.03681e-08	-13.3462	0.551524	6.6959
SKIL	1156.7	1187.21	1242.49	1274.79	1214.44	760.851	808.604	793.914	1.66761e-07	-0.62497	8.00351e-09	-13.6464	0.648433	6.77791
MTMR9	935.996	965.409	1014.52	958.549	939.098	630.63	643.519	622.494	1.73567e-07	-0.606118	8.53981e-09	-13.5706	0.656962	6.76053
ATOH8	146.181	161.891	168.731	145.093	163.101	323.246	290.095	305.143	2.29365e-07	0.966562	1.21679e-08	13.1635	1.95418	6.63947
HSP90AB1	26493	26174.1	26877.5	25177.8	25746.1	17229.1	17376.4	17760.9	1.77049e-07	-0.579754	8.74678e-09	-13.5428	0.669078	6.75191
SLC22A18	245.285	258.567	240.767	289.943	281.913	470.492	489.986	503.359	2.03444e-07	0.894451	1.05061e-08	13.331	1.8589	6.69156
ZPR1	1626.74	1692.76	1708.29	1547.3	1586.69	1080.53	1094.14	1073.34	1.64481e-07	-0.591925	7.82593e-09	-13.6727	0.663457	6.78388
GALNT3	188.987	166.634	178.647	189.088	186.067	79.0104	73.8215	84.763	2.82985e-07	-1.20263	1.58569e-08	-12.866	0.434483	6.54824
TBL1X	905.371	922.919	828.947	907.233	905.348	1317.32	1359.27	1347.96	1.67556e-07	0.586473	8.06653e-09	13.6372	1.50157	6.77584
PPP1R15A	2251.05	2317.51	2248.12	2468.96	2352.34	1307.18	1052.12	943.371	1.65202e-07	-1.09303	7.90133e-09	-13.6615	0.468775	6.78198
P2RY2	193.168	236.339	222.04	210.27	189.797	63.5211	82.0258	73.2844	2.86332e-07	-1.52776	1.61868e-08	-12.8431	0.346817	6.54313
SYT11	777.627	721.032	676.97	853.75	804.866	1356.38	1381.73	1371.69	1.70684e-07	0.842348	8.27672e-09	13.6072	1.79297	6.76781
FTH1P11	497.661	512.28	520.068	585.316	515.818	848.789	861.216	861.536	1.84368e-07	0.70567	9.15423e-09	13.4899	1.6309	6.73431
GTF2IP4	333.138	310.358	337.499	301.08	301.601	535.484	517.856	532.086	2.03953e-07	0.741427	1.05662e-08	13.3245	1.67183	6.69047
ATAD3B	414.827	423.844	403.649	394.983	451.002	232.26	231.141	224.955	2.28345e-07	-0.862097	1.20949e-08	-13.1703	0.550152	6.64141
SREBF1	673.42	654.545	641.443	643.947	615.428	980.399	940.612	989.206	1.81633e-07	0.587866	8.98829e-09	13.5111	1.50302	6.74081
GEMIN5	977.872	1005.2	980.964	939.517	961.539	667.263	650.209	648.414	1.85557e-07	-0.569851	9.27248e-09	-13.475	0.673686	6.73152
KANK2	1723.85	1685.53	1582.92	2001.88	1780	3228.11	3078.85	3124.25	1.66499e-07	0.845338	7.97715e-09	13.6503	1.79669	6.77859
TAF4B	353.562	368.378	377.98	303.723	356.869	155.982	158.033	156.721	2.58428e-07	-1.16082	1.39668e-08	-13.0078	0.447257	6.58766
TSPAN33	220.732	237.231	259.561	237.258	221.793	101.663	110.643	106.529	2.84439e-07	-1.1403	1.59855e-08	-12.857	0.453664	6.54601
PGM1	1166.97	1134.18	1125.01	1235.4	1146.06	1707.64	1676.82	1777.01	1.72787e-07	0.567535	8.40732e-09	13.5889	1.48199	6.76249
PHGDH	2055.89	2268.42	2213.59	2367.69	2404.09	1334.51	1364.75	1430.44	1.71775e-07	-0.71483	8.34385e-09	-13.5977	0.609277	6.76504
EPG5	1868.91	1874.76	1952.05	1908.48	1893.77	1166.26	1236.62	1334.56	1.73379e-07	-0.610425	8.47924e-09	-13.5789	0.655004	6.761
LIG1	503.773	531.415	495.4	531.623	518.515	762.894	799.289	812.052	1.95162e-07	0.616811	9.92354e-09	13.3966	1.53348	6.70961
CCT2	5013.12	5164.05	5701.18	4787.14	5034.98	2992.48	3073.39	3251.23	1.73358e-07	-0.725229	8.46386e-09	-13.5811	0.604901	6.76106
PLS1	328.019	324.307	338.502	262.1	251.656	82.7805	79.2031	89.9405	3.00403e-07	-1.83508	1.73565e-08	-12.7658	0.280276	6.5223
LANCL1	968.687	853.085	866.463	922.102	915.819	1359.41	1426.08	1460.5	1.84996e-07	0.645608	9.21608e-09	13.4821	1.5644	6.73284
TIMM44	1172.03	1145.7	1303.68	1131.7	1254.01	708.479	712.632	736.793	1.95162e-07	-0.738376	9.9328e-09	-13.3955	0.599414	6.70961
ANO4	328.002	339.989	332.584	303.003	318.197	169.784	179.462	174.419	2.77926e-07	-0.894053	1.53892e-08	-12.8993	0.5381	6.55607
GLT8D1	647.86	682.33	653.298	711.72	662.927	1018.91	988.196	1003.69	1.99478e-07	0.580468	1.02352e-08	13.361	1.49533	6.7001
NID2	1547.08	1453.38	1192.1	1734.23	1471.13	3389.7	3249.86	3315.62	1.84826e-07	1.17532	9.19229e-09	13.4851	2.25843	6.73324
TTC17	1244.61	1265.45	1183.24	1341.15	1246.8	1831.73	1907.76	1885.22	1.85557e-07	0.578934	9.27475e-09	13.4747	1.49375	6.73152
GBA	2042.67	2145.4	1942.14	2159.31	2085.24	3281.58	3018.31	3281.28	1.84368e-07	0.622209	9.14167e-09	13.4915	1.53923	6.73431
D2HGDH	193.151	192.211	203.284	214.684	188.134	344.823	377.062	348.23	2.65147e-07	0.848675	1.44837e-08	12.9671	1.80085	6.57651
SIPA1L2	443.49	487.451	475.675	440.64	471.257	263.489	241.305	270.824	2.58532e-07	-0.844809	1.39982e-08	-13.0053	0.556785	6.58749
HEATR1	1456.08	1369.19	1406.31	1476.49	1367.43	971.951	962.308	947.759	1.97152e-07	-0.558485	1.00668e-08	-13.3801	0.679015	6.7052
MFAP3L	245.323	278.229	258.522	227.222	301.523	97.7729	86.4144	95.8547	3.18269e-07	-1.48198	1.8863e-08	-12.6741	0.357996	6.4972
BMP4	616.195	597.631	694.759	565.16	615.564	271.723	291.195	326.749	2.51875e-07	-1.05823	1.355e-08	-13.0419	0.48022	6.59882
RAB3B	3078.78	2996.97	3102.73	3154.33	2996.92	2099.54	2236.7	2160.94	1.89754e-07	-0.501645	9.56235e-09	-13.4394	0.706301	6.72181
RASSF4	82.8203	72.9143	81.8788	80.1864	78.7488	161.161	158.067	160.57	3.28498e-07	1.01701	1.96325e-08	12.6303	2.02371	6.48347
COL8A2	265.707	249.939	277.303	248.287	243.98	132.397	117.039	118.318	3.10135e-07	-1.06796	1.81752e-08	-12.715	0.476994	6.50845
ACTR2	6164.69	5814.59	5846.24	5872.2	5875.26	8255.64	8741.91	8791.31	2.01818e-07	0.539184	1.04054e-08	13.3421	1.45315	6.69504
SLC6A17	106.326	103.151	93.7118	100.061	106.283	202.544	233.259	202.348	3.13813e-07	1.06387	1.84427e-08	12.6989	2.09054	6.50333
ZMYND11	1175.08	1077.53	1058.91	1131.75	1076.69	1687.42	1605.52	1647.28	1.99659e-07	0.578091	1.0261e-08	13.3581	1.49287	6.69971
LAPTM4A	3173.82	2936.43	3236.93	3462.53	3250.57	5246.57	4982.17	5456.27	1.98739e-07	0.704049	1.01643e-08	13.369	1.62907	6.70172
COL6A1	7336.8	7627.66	6715.63	7926.58	7424.54	14090.6	13060	12079.8	2.15418e-07	0.819543	1.12494e-08	13.2528	1.76485	6.66672
ELOA	1590.94	1586.82	1587.91	1567.48	1537.88	1126.01	1150.76	1121.83	2.05891e-07	-0.474307	1.06836e-08	-13.3118	0.719812	6.68636
TUBB2A	864.466	943.934	1014.53	886.695	910.8	427.13	515.296	503.116	2.41103e-07	-0.941494	1.29105e-08	-13.0964	0.520693	6.6178
GSTA4	137.994	136.866	134.185	138.255	124.313	242.595	245.835	244.905	3.14238e-07	0.862813	1.84938e-08	12.6958	1.81858	6.50274
MYL12A	4976.34	4594.51	5223.52	4969	5108.93	3295.81	3359.14	3309.29	2.03953e-07	-0.581496	1.0562e-08	-13.3249	0.66827	6.69047
LDB2	108.388	114.3	99.6251	142.607	113.064	289.073	252.531	287.112	3.15763e-07	1.26458	1.86882e-08	12.6844	2.40258	6.50064
CLMN	171.683	165.509	182.573	167.02	174.522	71.5912	84.2723	79.5922	3.71102e-07	-1.13666	2.24943e-08	-12.4821	0.454811	6.43051
KLF8	249.313	247.676	216.119	225.103	257.287	103.127	103.349	82.3742	3.51658e-07	-1.31938	2.12208e-08	-12.5454	0.400706	6.45388
PROS1	381.163	387.235	379.932	386.054	354.086	574.564	609.718	597.24	2.58428e-07	0.653501	1.39519e-08	13.009	1.57298	6.58766
RBL2	574.272	483.743	523.027	620.013	564.935	1000.47	984.67	1075.02	2.33165e-07	0.886527	1.24468e-08	13.1378	1.84872	6.63234
EHMT2	841.002	892.73	884.222	843.99	851.145	1223.51	1223.73	1259.2	2.23725e-07	0.518885	1.17729e-08	13.2009	1.43285	6.65029
TBC1D5	874.681	754.703	755.929	878.868	733.35	1391.44	1374.96	1385.36	2.23979e-07	0.796054	1.18079e-08	13.1976	1.73635	6.64979
ZNF227	172.69	162.099	148.012	155.722	151.185	278.42	293.189	294.836	3.14446e-07	0.873447	1.85321e-08	12.6936	1.83203	6.50245
TNFRSF10A	313.713	328.68	334.553	333.383	343.191	192.054	185.392	187.042	3.14933e-07	-0.813298	1.85869e-08	-12.6903	0.569079	6.50178
SEMA7A	536.476	583.196	591.142	582.748	610.666	341.52	343.773	306.018	2.7994e-07	-0.813685	1.56399e-08	-12.8813	0.568927	6.55294
UNC13B	1279.33	1231.01	1239.51	1212.13	1256.38	883.819	852.552	880.539	2.30705e-07	-0.511897	1.22772e-08	-13.1533	0.7013	6.63694
ASF1B	1304.86	1332.1	1339.2	1233.82	1334.76	1849.43	1873.97	1877.53	2.17683e-07	0.513005	1.14038e-08	13.2372	1.42702	6.66218
DGKH	526.232	465.765	525.025	546.495	509.997	246.918	273.729	288.207	2.93191e-07	-0.93322	1.66736e-08	-12.8102	0.523688	6.53285
FKBP7	220.75	230.159	212.153	217.098	222.513	354.896	372.022	389.68	2.99967e-07	0.755611	1.72858e-08	12.7703	1.68835	6.52293
CD9	1784.17	1859.66	1876.02	1728.74	1835.69	2626.98	2539.21	2688.66	2.17683e-07	0.527558	1.13951e-08	13.2381	1.44149	6.66218
CD2AP	1432.62	1379.33	1474.39	1370.53	1424.02	958.049	924.292	997.753	2.3207e-07	-0.561196	1.23691e-08	-13.1449	0.67774	6.63438
ZDHHC24	322.906	300.944	285.187	328.991	326.743	519.343	537.727	515.146	2.85271e-07	0.746386	1.61033e-08	12.8488	1.67758	6.54474
ZBTB38	1666.6	1612.34	1487.2	1746.48	1627.01	2473.77	2632.25	2551.07	2.23725e-07	0.650244	1.1776e-08	13.2007	1.56943	6.65029
TUBA1C	3126.79	3336.22	3386.97	3046.96	2954.81	2017.3	1833.33	2008.22	2.23725e-07	-0.698524	1.17698e-08	-13.2013	0.616202	6.65029
RTL8B	313.73	317.305	292.09	308.92	300.76	553.606	501.972	490.427	2.93191e-07	0.747677	1.66961e-08	12.8087	1.67909	6.53285
SAP30BP	1688.06	1686.58	1789.21	1639.9	1676.93	1200.7	1169.29	1177.49	2.35142e-07	-0.520067	1.25718e-08	-13.1264	0.69734	6.62867
C4orf46	460.843	462.42	445.075	415.487	458.358	693.065	689.147	727.342	2.7571e-07	0.650241	1.51979e-08	12.9133	1.56943	6.55955
SYNJ1	703.013	728.206	731.283	729.149	697.466	486.259	477.31	465.718	2.79383e-07	-0.590647	1.55625e-08	-12.8868	0.664045	6.5538
KARS1	3540.64	3771.81	3804.41	3472.04	3535.3	2310.46	2408.1	2518.95	2.30574e-07	-0.587181	1.22512e-08	-13.1557	0.665642	6.63719
DNAJB9	1013.7	1080.79	1047.06	1155.84	1128.16	676.805	689.972	650.156	2.61175e-07	-0.688693	1.42235e-08	-12.9874	0.620416	6.58307
TNNT1	961.542	929.953	900.023	919.506	869.312	593.31	499.914	526.943	2.74107e-07	-0.76548	1.50413e-08	-12.9248	0.588258	6.56208
CD4	290.241	279.214	276.294	394.052	318.87	697.844	661.875	687.882	2.91621e-07	1.14311	1.6539e-08	12.8192	2.20856	6.53518
TNRC6C	577.315	655.976	616.818	601.957	584.922	335.177	359.173	300.143	3.00403e-07	-0.875546	1.74235e-08	-12.7615	0.545047	6.5223
LHFPL6	902.28	836.701	922.73	843.253	841.804	563.259	538.342	547.439	2.75763e-07	-0.660693	1.52236e-08	-12.9114	0.632574	6.55946
MAP3K9	305.589	288.589	297.016	288.828	335.123	132.181	149.934	153.54	3.71102e-07	-1.06182	2.25348e-08	-12.4802	0.479027	6.43051
PGM5	220.748	202.458	254.616	198.894	209.609	83.6126	67.3886	83.4888	4.25511e-07	-1.47162	2.69211e-08	-12.2888	0.360576	6.37109
EIF1AD	582.466	662.575	652.325	663.286	688.062	370.789	370.747	373.185	2.99967e-07	-0.803204	1.7302e-08	-12.7693	0.573075	6.52293
ZNF804A	158.29	137.509	140.172	123.131	130.121	51.802	53.4418	46.7845	4.59e-07	-1.44115	2.98289e-08	-12.1796	0.368275	6.33819
PABIR2	541.574	565.957	548.699	560.215	537.431	833.211	892.067	803.361	2.77588e-07	0.612118	1.53474e-08	12.9023	1.5285	6.5566
PALM	834.878	859.871	900.997	749.47	797.727	1475.86	1341.42	1357.6	2.58532e-07	0.750381	1.40212e-08	13.0035	1.68224	6.58749
NUDC	3092.04	3120.5	3182.68	2983.78	3127.81	2277.92	2227.64	2233.06	2.46725e-07	-0.465053	1.3232e-08	-13.0686	0.724445	6.60779
LAMP3	137.868	153.393	135.244	149.554	159.889	60.6506	60.994	63.5198	4.62995e-07	-1.25197	3.01653e-08	-12.1677	0.419873	6.33442
HERPUD1	1485.75	1638.31	1760.6	1685.91	1749.32	1017.44	972.466	1009.66	2.60072e-07	-0.732678	1.41418e-08	-12.9938	0.601786	6.58491
PTPRS	1632.89	1714.18	1497.07	1736.04	1614.92	2700.04	2582.47	2487.24	2.48327e-07	0.661304	1.33385e-08	13.0596	1.58151	6.60498
ITGB1P1	1085.19	1131.01	1064.83	1236.57	1141.19	1697.19	1793.86	1795.96	2.58125e-07	0.640159	1.39076e-08	13.0126	1.5585	6.58817
NTNG2	74.6418	86.0765	64.1073	87.2749	75.3681	171.194	192.715	181.163	4.33727e-07	1.23669	2.77192e-08	12.2576	2.35658	6.36278
CNTN3	171.717	171.361	165.762	142.428	184.642	317.127	321.225	330.917	3.71102e-07	0.95453	2.25479e-08	12.4795	1.93795	6.43051
ST14	178.823	190.724	163.812	187.09	204.863	77.3816	78.9568	76.5846	4.55723e-07	-1.24617	2.94648e-08	-12.1926	0.421565	6.3413
SHTN1	874.678	903.35	937.547	787.86	880.682	495.266	514.667	450.283	2.99967e-07	-0.84875	1.72749e-08	-12.771	0.555266	6.52293
BAG3	1886.32	2129.14	1990.52	1963.67	1918.45	1347.1	1255.4	1221.96	2.62438e-07	-0.633258	1.4314e-08	-12.9803	0.644719	6.58097
SLC35E2B	438.381	431.225	458.89	491.843	450.545	695.762	715.523	732.506	3.00403e-07	0.655423	1.73921e-08	12.7635	1.57508	6.5223
JMJD1C	1271.14	1150.81	1202.02	1211.38	1171.27	796.544	803.795	824.926	2.79728e-07	-0.571019	1.56048e-08	-12.8838	0.673141	6.55326
KDELR1	4469.49	4337.59	4092.55	4367.29	4215.42	6332.48	6026.64	6331.75	2.66237e-07	0.536441	1.45654e-08	12.9608	1.45039	6.57473
RCN1	1876.08	1974.79	1819.79	2095.51	1947	2937.45	2950.84	3171.33	2.58532e-07	0.637272	1.40367e-08	13.0022	1.55539	6.58749
ADARB1	810.328	744.3	744.082	911.779	802.215	1450.14	1375.44	1334.6	2.75672e-07	0.791557	1.51729e-08	12.9151	1.73094	6.55961
ARPIN	189.034	159.426	175.656	167.855	180.553	305.03	322.43	340.358	3.79163e-07	0.888316	2.32449e-08	12.4466	1.85101	6.42117
TRIM37	665.204	628.007	636.53	679.757	680.299	951.844	970.177	970.613	2.91621e-07	0.552067	1.65238e-08	12.8202	1.46618	6.53518
EIF2A	1795.36	1777.1	1843.48	1611.19	1685.41	1156.13	1093.12	1098.7	2.75597e-07	-0.641468	1.5146e-08	-12.9171	0.64106	6.55973
KBTBD7	155.343	142.099	111.475	126.948	121.735	281.95	309.209	342.509	4.05185e-07	1.24849	2.50889e-08	12.3643	2.37592	6.39235
CORO1C	4537.93	4562.93	4635.36	4500.79	4521.78	3140.98	3212.49	3399.21	2.70936e-07	-0.4862	1.48449e-08	-12.9395	0.713903	6.56713
BOC	363.84	354.135	421.373	394.532	345.27	178.687	154.436	178.61	4.09621e-07	-1.13784	2.54315e-08	-12.3498	0.454438	6.38762
ZNF641	441.402	462.662	423.381	417.45	403.382	227.094	248.254	212.109	3.84618e-07	-0.906457	2.3715e-08	-12.425	0.533494	6.41497
PLCXD2	174.71	175.283	177.656	154.126	151.33	73.1814	70.434	69.4802	4.98746e-07	-1.22584	3.3219e-08	-12.0658	0.427549	6.30212
GALNT5	718.403	631.902	615.764	837.081	759.898	1445.99	1392.02	1519.68	2.91621e-07	1.03585	1.65584e-08	12.8179	2.05033	6.53518
CCN4	415.961	398.917	331.531	593.802	437.26	1146.29	1406.38	1387.23	3.06796e-07	1.61253	1.79541e-08	12.7284	3.05787	6.51315
RAB11FIP1	591.63	596.195	619.77	591.449	586.552	384.633	365.019	398.759	3.45144e-07	-0.642416	2.07295e-08	-12.5709	0.640639	6.462
NOC3L	1062.68	1099.25	1079.65	1013.97	1029.46	638.442	706.285	704.085	3.03917e-07	-0.631422	1.771e-08	-12.7435	0.64554	6.51725
EMP3	2248.04	2172.12	2141.5	2422.63	2338.16	3379.53	3347.16	3519.74	2.78354e-07	0.594222	1.54359e-08	12.8959	1.50966	6.5554
SLC9A6	1280.39	1262.76	1320.42	1214.55	1224.34	859.211	811.292	871.182	2.9751e-07	-0.572378	1.69894e-08	-12.7894	0.672507	6.5265
AHSA1	3633.64	4015.92	3886.31	3529.97	3767.47	2540.76	2532.05	2511.56	2.78528e-07	-0.573761	1.5478e-08	-12.8929	0.671863	6.55513
CRYBG1	480.227	486.792	456.936	424.307	442.979	219.822	262.082	236.115	3.87602e-07	-0.93731	2.3936e-08	-12.415	0.522205	6.41161
CLIP4	639.658	571.864	626.664	636.429	590.724	933.341	930.583	994.395	3.06046e-07	0.636984	1.78848e-08	12.7327	1.55507	6.51421
PIP5K1A	3080.76	2925.65	2964.59	2795.99	2838.92	2081.35	2010.03	1969.72	2.78528e-07	-0.531616	1.54917e-08	-12.8919	0.691779	6.55513
AEN	1382.53	1502.11	1364.85	1552.68	1511.99	835.017	924.512	913.422	2.9751e-07	-0.715258	1.70093e-08	-12.7881	0.609096	6.5265
CD248	1500.08	1494	1381.59	1923.18	1578.75	3377.77	3138.4	3277.55	2.82412e-07	1.05969	1.58014e-08	12.8699	2.08449	6.54912
TWSG1	1930.24	1771.83	1689.51	2012.24	1909.04	2966.49	2970.93	3032.84	2.83246e-07	0.685743	1.5895e-08	12.8633	1.60853	6.54784
TTLL1	123.655	111.955	113.472	110.625	114.194	249.821	208.919	227.745	4.55723e-07	0.996513	2.94298e-08	12.1939	1.99517	6.3413
AKAP12	4729.03	4404	4353.09	4640.1	4232.61	3051.36	3081.57	2927.49	2.85271e-07	-0.565301	1.60668e-08	-12.8513	0.675814	6.54474
LAMA4	608.026	563.027	521.031	778.451	666.321	1355.59	1414.35	1514.16	3.0411e-07	1.1993	1.77465e-08	12.7413	2.29628	6.51697
AATF	1300.78	1328.67	1361.9	1340.47	1363.2	967.022	926.038	883.043	3.00403e-07	-0.53374	1.74426e-08	-12.7603	0.690762	6.5223
LARS1	3274.97	3165.17	3165.88	3214	3188.68	2366.38	2345.49	2402.85	2.85271e-07	-0.43279	1.6087e-08	-12.8499	0.740828	6.54474
WDR1	8269.68	8688.28	8831.54	8361.5	8387.18	5733.25	5886.6	6139.25	2.985e-07	-0.523361	1.71222e-08	-12.7808	0.695749	6.52506
PDLIM3	390.393	459.65	412.49	425.79	393.556	216.725	225.95	226.133	4.11771e-07	-0.896881	2.57015e-08	-12.3384	0.537046	6.38534
S100A4	1024.97	750.777	1048.02	666.906	818.941	2434.59	2545.25	3188.4	2.9751e-07	1.67164	1.70161e-08	12.7877	3.18576	6.5265
PTMAP5	602.895	569.21	525.979	587.783	563.951	923.765	976.079	867.491	3.20044e-07	0.69392	1.90212e-08	12.665	1.61767	6.49479
KYNU	277.998	230.688	225.942	436.477	364.484	1020.32	1101.61	1105.58	3.45523e-07	1.85515	2.07932e-08	12.5676	3.6179	6.46152
TMEM106B	1048.43	1012.57	990.796	1110.76	1046.37	1534.02	1497.55	1594.07	2.98403e-07	0.566424	1.70919e-08	12.7828	1.48085	6.5252
PPFIA4	172.777	157.277	223.984	178.718	180.921	494.226	466.527	386.2	4.11771e-07	1.30002	2.56919e-08	12.3388	2.46233	6.38534
CCT3	7612.65	7675.36	8231.51	7266.95	7888.38	5007.93	4974.69	5357.86	3.00403e-07	-0.596672	1.74554e-08	-12.7595	0.661278	6.5223
FKBP1C	213.559	200.077	210.202	218.227	209.815	349.416	365.972	336.358	4.23464e-07	0.737333	2.67122e-08	12.2971	1.66709	6.37318
ATP6V0E2	741.84	741.965	702.65	703.907	722.372	1052.66	1007.42	1065.71	3.21321e-07	0.528519	1.91368e-08	12.6583	1.44245	6.49306
UPF1	4135.35	4248.82	4230.73	4217.58	4341.14	2733.12	2992.68	3041.58	2.99967e-07	-0.536364	1.73058e-08	-12.769	0.689506	6.52293
PEA15	9924	10425.9	10108.6	8960.64	9336.6	6390.51	5819.77	5979.14	3.15763e-07	-0.684489	1.8663e-08	-12.6858	0.622226	6.50064
EEPD1	112.458	108.31	134.194	104.367	114.019	233.588	226.178	255.384	4.88114e-07	1.0608	3.22065e-08	12.0984	2.08608	6.31148
ARHGAP31	1152.6	1110.4	1060.89	1065.05	1028.52	679.215	728.661	702.747	3.36173e-07	-0.622559	2.01191e-08	-12.6035	0.649518	6.47344
DDX39A	2332.84	2394	2363.56	2205.24	2323.59	1644.03	1656.13	1683.92	3.03917e-07	-0.483865	1.77084e-08	-12.7436	0.715059	6.51725
PRMT2	865.495	849.696	874.366	829.392	890.918	1259.19	1241.58	1383.89	3.19723e-07	0.585556	1.89756e-08	12.6676	1.50062	6.49523
SLC1A5	1994.59	2203.66	2240.24	2242.91	2246.59	1449.81	1444.05	1484.43	3.11772e-07	-0.581135	1.82969e-08	-12.7076	0.668438	6.50616
ADAM33	224.845	204.103	184.504	139.693	188.767	624.291	579.512	464.612	4.27685e-07	1.56908	2.71203e-08	12.2809	2.96715	6.36888
FOXC1	328.048	358.734	339.468	331.423	347.259	192.542	185.793	159.021	4.71976e-07	-0.93094	3.09069e-08	-12.142	0.524517	6.32608
CDH2	682.589	771.381	745.098	744.722	743.092	480.464	451.417	442.192	3.79163e-07	-0.687082	2.32577e-08	-12.446	0.621109	6.42117
NOCT	271.817	325.419	334.574	297.925	301.071	134.627	152.349	128.667	4.98746e-07	-1.14281	3.328e-08	-12.0639	0.452877	6.30212
GNS	4692.27	4296.83	4551.44	4865.95	4557.58	6717.51	6947.43	7362.43	3.21321e-07	0.609992	1.91503e-08	12.6575	1.52625	6.49306
GPER1	93.0485	101.465	100.628	69.5952	104.599	287.482	227.528	290.229	5.08719e-07	1.51739	3.42469e-08	12.0338	2.86272	6.29352
MAGEF1	501.695	473.675	438.165	490.164	444.562	775.185	826.873	735.237	3.72563e-07	0.730019	2.26731e-08	12.4735	1.65866	6.4288
LYPD6	212.538	200.957	239.83	220.01	223.694	108.282	99.4704	90.9545	5.38706e-07	-1.13802	3.73754e-08	-11.9423	0.454384	6.26865
OLFML2A	338.273	346.531	292.075	290.521	310.935	596.739	535.046	559.555	4.09068e-07	0.838528	2.53633e-08	12.3526	1.78823	6.3882
PALM3	156.395	146.275	170.71	143.379	161.392	57.1025	71.4767	59.492	6.07775e-07	-1.31602	4.35238e-08	-11.7844	0.40164	6.21626
RASA2	693.829	653.82	596.054	587.717	642.281	351.321	369.3	358.614	4.17473e-07	-0.816991	2.62651e-08	-12.3152	0.567625	6.37937
PHF19	954.368	907.606	933.589	972.488	958.981	1308.78	1329.77	1390.01	3.43515e-07	0.505871	2.0587e-08	12.5784	1.41998	6.46405
NLGN2	1609.42	1654.48	1458.57	1743.71	1699.13	2915.16	2712.77	2567.59	3.2655e-07	0.743121	1.9489e-08	12.6383	1.67379	6.48605
SALL2	245.284	256.84	275.32	323.847	279.326	538.392	525.384	500.356	4.30872e-07	0.923091	2.73938e-08	12.2702	1.89617	6.36565
ACVR2B	228.851	213.225	233.917	202.69	234.21	108.383	89.5661	103.818	5.65184e-07	-1.14529	3.95404e-08	-11.8837	0.4521	6.24781
ANKRD10	915.603	839.053	915.793	966.086	944.858	1361.46	1482.62	1396.77	3.46488e-07	0.626398	2.08801e-08	12.563	1.54371	6.46031
KLF5	716.301	684.937	702.654	751.659	692.249	429.512	472.601	418.731	4.1143e-07	-0.689241	2.55779e-08	-12.3436	0.62018	6.3857
HCMVUS33	2605.68	2964.3	3050.44	2714.39	3186.34	2089.69	2140.5	2438.09	0.000322934	-0.385283	0.000105815	-5.5883	0.765629	3.49089
WTIP	547.68	630.998	620.776	508.291	562.601	264.873	289.648	291.224	4.56234e-07	-1.02217	2.95735e-08	-12.1887	0.492375	6.34081
FBXW7	547.716	587.495	615.817	600.947	605.466	344.367	377.543	355.33	4.36081e-07	-0.71909	2.79057e-08	-12.2504	0.607481	6.36043
AK3	952.353	947.181	937.522	1013.07	896.807	1353.44	1416.52	1387.99	3.5664e-07	0.546609	2.1551e-08	12.5286	1.46065	6.44777
TMC6	284.13	301.624	289.125	267.173	310.175	133.652	146.672	157.216	5.35616e-07	-0.994187	3.7041e-08	-11.9517	0.502019	6.27115
ENSA	1451	1358.64	1475.37	1455.47	1456.75	1998.46	2078.74	2193.46	3.45144e-07	0.537709	2.07418e-08	12.5703	1.45167	6.462
ERG28	645.84	604.418	646.377	550.285	599.05	1045.66	941.876	1015.6	3.84618e-07	0.71826	2.37044e-08	12.4255	1.6452	6.41497
FARSB	1421.34	1380.41	1325.37	1302.26	1297.69	933.962	885.596	920.733	3.75489e-07	-0.558041	2.29389e-08	-12.4609	0.679224	6.4254
APLP1	490.523	475.037	512.165	459.442	513.163	743.581	734.136	750.827	4.15487e-07	0.601181	2.60368e-08	12.3245	1.51696	6.38144
PGF	433.307	382.627	477.632	385.809	410.728	208.062	194.769	190.592	5.19422e-07	-1.07907	3.52625e-08	-12.0032	0.473332	6.28448
PPM1G	4391.82	4356.68	4363.96	4342.29	4183.7	3251.91	3143.84	3098.47	3.64282e-07	-0.451591	2.20429e-08	-12.5041	0.731236	6.43856
CLEC2B	233.049	237.666	245.693	244.639	265.376	394.221	447.945	455.831	4.90204e-07	0.817229	3.24231e-08	12.0914	1.76202	6.30962
AMDHD2	164.557	177.517	175.643	169.47	201.168	320.401	310.276	338.192	5.29011e-07	0.866724	3.61729e-08	11.9765	1.82352	6.27653
CNBP	5220.57	5425.28	5593.58	5193.11	5340.97	3618.95	3858.45	3842.59	3.72563e-07	-0.505168	2.27039e-08	-12.4721	0.704578	6.4288
S100A16	1352.91	1252.48	1284.9	1402.67	1311.34	1871.81	2059.82	2031.65	3.72563e-07	0.589668	2.27293e-08	12.4709	1.5049	6.4288
KIAA1958	296.34	259.474	258.544	288.279	285.434	136	136.305	149.71	5.83441e-07	-0.980269	4.12746e-08	-11.8392	0.506885	6.234
HID1	159.513	193.532	217.072	175.212	182.596	65.5585	69.2542	53.9006	6.92473e-07	-1.56716	5.06267e-08	-11.6293	0.337472	6.1596
ECE1	3335.27	3555.99	3276.4	4006.39	3573.94	5921.93	5965.07	5812.97	3.80534e-07	0.736558	2.33733e-08	12.4406	1.6662	6.41961
ANXA3	1020.81	1049.08	1163.55	817.997	928.654	393.3	387.442	418.2	4.55874e-07	-1.30864	2.95124e-08	-12.1909	0.403702	6.34116
ESF1	1459.16	1359.58	1475.38	1400.96	1390.56	1014.79	972.046	964.956	3.98772e-07	-0.525953	2.46588e-08	-12.3829	0.6945	6.39928
USP32	1903.69	1918.55	1934.27	1782.63	1846.21	1279.86	1285.19	1362.92	3.84618e-07	-0.519835	2.37198e-08	-12.4248	0.697452	6.41497
TRIM52	113.458	115.393	111.493	135.028	117.62	223.306	238.454	219.444	6.0664e-07	0.93758	4.32516e-08	11.7908	1.91531	6.21707
POLR3F	446.53	382.909	407.576	397.365	399.819	229.86	232.177	235.476	5.35616e-07	-0.804418	3.70533e-08	-11.9514	0.572593	6.27115
PTPRD	113.456	127.603	114.463	116.754	122.01	50.8718	55.8584	44.0993	7.60657e-07	-1.2553	5.7125e-08	-11.5067	0.418905	6.11881
GLRX	889.003	825.437	832.906	918.634	873.62	1238.14	1339.97	1360.05	4.14745e-07	0.597138	2.5956e-08	12.3279	1.51271	6.38222
PCSK9	224.85	159.055	222.015	102.344	122.304	677.553	676.156	844.938	5.3272e-07	2.20493	3.66069e-08	11.964	4.61051	6.2735
SH2D5	603.875	573.788	628.663	529.036	545.252	203.08	273.634	279.058	5.34299e-07	-1.20513	3.67735e-08	-11.9593	0.433729	6.27222
FAM107B	982.004	953.085	1029.3	976.516	972.439	1375.2	1424.53	1532.73	4.12231e-07	0.553939	2.57644e-08	12.3358	1.46809	6.38486
GAMT	216.685	235.223	227.937	231.755	261.238	421.56	391.429	399.235	5.35616e-07	0.786461	3.70722e-08	11.9508	1.72484	6.27115
KLHL15	602.897	664.302	710.563	620.774	577.754	328.456	343.592	347.925	5.08719e-07	-0.898683	3.42815e-08	-12.0327	0.536376	6.29352
CCDC50	1715.66	1794.46	1848.42	1808.83	1805.98	1232.15	1309.97	1182.81	4.11724e-07	-0.532161	2.56304e-08	-12.3414	0.691518	6.38539
CYGB	310.703	359.441	329.58	365.981	343.638	732.514	624.49	592.42	4.98746e-07	0.923681	3.32446e-08	12.065	1.89695	6.30212
RETSAT	593.712	602.855	600.989	631.092	556.997	877.554	993.015	991.256	4.5256e-07	0.675064	2.91853e-08	12.2027	1.59667	6.34432
FLI1	436.376	488.925	500.33	436.094	426.202	246.05	252.327	236.83	5.63488e-07	-0.896306	3.93746e-08	-11.8881	0.537261	6.24912
EEF1A2	5201.16	5270.81	5705.1	4993.06	5179.26	3676.89	3535.06	3573.07	4.16156e-07	-0.550617	2.61335e-08	-12.3206	0.682728	6.38074
UTP3	1315.08	1415.88	1402.36	1378.59	1426.03	971.304	984.874	911.835	4.33727e-07	-0.538358	2.77065e-08	-12.2581	0.688554	6.36278
SLC17A5	764.383	707.004	768.742	841.369	822.708	1214.1	1258.72	1355.85	4.38437e-07	0.709872	2.80928e-08	12.2433	1.63566	6.35809
CPT1C	936.021	973.875	884.217	892.489	906.203	1446.4	1416.83	1297.45	4.31422e-07	0.594159	2.74645e-08	12.2674	1.50959	6.3651
DHX16	1521.51	1655.59	1694.47	1587.13	1536.72	1112.71	1059.05	1053.46	4.30872e-07	-0.572117	2.73744e-08	-12.2709	0.672629	6.36565
PLD1	343.37	309.384	372.037	395.628	319.604	617.148	693.686	639.094	5.08719e-07	0.906404	3.42829e-08	12.0327	1.87437	6.29352
FGD5-AS1	1650.23	1532.19	1473.4	1542.99	1636.64	2222.05	2347.24	2402.38	4.16156e-07	0.569113	2.61477e-08	12.32	1.48361	6.38074
DDX27	1249.69	1229.37	1286.89	1318.83	1323.63	898.263	914.843	892.702	4.41975e-07	-0.506044	2.84661e-08	-12.2293	0.70415	6.3546
HOXB6	378.117	383.672	395.721	383.38	354.013	219.703	196.919	226.895	5.98173e-07	-0.821075	4.24433e-08	-11.8103	0.56602	6.22317
ARRDC4	566.069	637.018	674.077	673.21	653.114	371.886	363.238	361.068	5.24761e-07	-0.809223	3.57554e-08	-11.9886	0.570689	6.28004
TNS2	482.32	526.245	454.931	515.152	490.946	772.31	815.315	751.791	4.85658e-07	0.660237	3.20042e-08	12.1051	1.58034	6.31367
TXNDC15	849.152	792.66	809.222	892.68	861.621	1225.41	1216.35	1265.9	4.41975e-07	0.556687	2.84613e-08	12.2294	1.47089	6.3546
KIF1A	498.664	514.144	497.38	586.364	604.786	261.23	267.039	276.087	5.63043e-07	-1.00695	3.92506e-08	-11.8913	0.497596	6.24946
C4orf3	1710.57	1613	1730.96	1852.84	1799.78	2511	2598.92	2662.18	4.23316e-07	0.574064	2.66678e-08	12.2989	1.48871	6.37334
NME1	773.511	811.098	817.148	740.34	768.896	512.706	514.943	524.519	4.98746e-07	-0.595664	3.32587e-08	-12.0646	0.66174	6.30212
CCDC9B	423.06	421.705	417.43	512.672	437.602	859.88	871.093	739.726	4.95147e-07	0.896195	3.28513e-08	12.0775	1.86115	6.30527
CELSR3	236.069	242.27	224.985	277.082	262.229	422.057	451.47	478.343	5.63488e-07	0.860211	3.9375e-08	11.8881	1.8153	6.24912
BTBD1	1605.29	1547.63	1624.39	1564.55	1524.63	2237.46	2105.44	2198.34	4.25511e-07	0.470592	2.69471e-08	12.2878	1.38568	6.37109
KPNA4	3777.66	3666.69	3575.46	3466.12	3608.59	2445.91	2649.35	2558.79	4.25511e-07	-0.504608	2.69044e-08	-12.2894	0.704852	6.37109
STOX2	133.894	128.301	115.437	127.945	123.581	50.7657	59.7156	45.1862	8.297e-07	-1.28449	6.38919e-08	-11.394	0.410516	6.08108
AASDHPPT	727.527	710.921	702.656	754.29	749.157	1015.54	1076.68	1114.87	4.65627e-07	0.552427	3.04526e-08	12.1576	1.46655	6.33196
ATP6AP2	1924.14	1851.97	2004.32	2025.95	1926.97	2670.91	2922.05	2888.12	4.33727e-07	0.537932	2.77004e-08	12.2583	1.45189	6.36278
DENND3	360.742	331.829	369.071	367.788	332.495	538.433	560.996	563.805	5.42577e-07	0.655597	3.7689e-08	11.9336	1.57527	6.26554
F2R	1464.29	1287.83	1301.67	1411.27	1291.48	1981.25	2142.21	2138.8	4.41799e-07	0.62867	2.83815e-08	12.2324	1.54614	6.35478
PTK7	1401.99	1440.51	1314.49	1676.28	1523.71	2460.09	2512.48	2609.19	4.41799e-07	0.78482	2.83688e-08	12.2329	1.72288	6.35478
ACACB	149.224	160.298	145.045	158.282	145.071	252.733	265.29	269.34	6.74151e-07	0.791951	4.90637e-08	11.6613	1.73141	6.17124
CRY1	810.316	880.041	902.017	726.31	820.408	458.717	457.778	423.275	5.29011e-07	-0.888212	3.62204e-08	-11.9751	0.540283	6.27653
PLK3	352.557	393.367	391.788	412.209	401.624	195.428	226.291	190.361	6.46452e-07	-0.939688	4.65656e-08	-11.7149	0.521345	6.18946
EFNB1	554.911	651.992	665.135	643.982	663.701	1010.69	1011.68	1056.82	4.90204e-07	0.693831	3.24256e-08	12.0913	1.61757	6.30962
FXR2	1555.21	1561.59	1568.15	1601.97	1688.34	1074.17	1132.6	1140.67	4.6245e-07	-0.515059	3.00915e-08	-12.1703	0.699765	6.33493
SFRP1	4346.93	4527.94	4096.47	5541.28	5173.28	9372.25	10417.4	10790.4	4.75299e-07	1.11222	3.12033e-08	12.1319	2.16178	6.32303
HSD17B14	105.311	95.2999	107.533	86.0879	84.6064	263.519	200.661	242.598	7.44045e-07	1.29536	5.56307e-08	11.5335	2.45438	6.1284
SGK1	895.164	990.226	929.613	1064.07	949.195	1456.95	1510.57	1502.69	4.72329e-07	0.62853	3.09692e-08	12.1398	1.54599	6.32576
EID1	4018.86	3916.6	3900.12	3898.86	3757.06	5492.76	5218.38	5395.86	4.64065e-07	0.461871	3.03119e-08	12.1625	1.37733	6.33342
EXOSC4	475.133	473.729	497.402	466.79	518.821	289.481	281.242	311.396	6.07775e-07	-0.725256	4.35277e-08	-11.7843	0.604889	6.21626
LSS	1762.69	1536.1	1786.22	1471.55	1562.19	2802.18	2634.87	2871.05	4.59e-07	0.773722	2.98001e-08	12.1806	1.70967	6.33819
SSR1	3490.58	3363.53	3400.75	3504.88	3346.82	4565.52	4621.87	4670.05	4.64065e-07	0.433326	3.0294e-08	12.1632	1.35034	6.33342
ANKRD9	450.673	481.156	516.12	448.224	459.803	774.743	710.539	765.658	5.34299e-07	0.671995	3.68039e-08	11.9584	1.59327	6.27222
UMPS	1052.46	1005.1	1083.6	1000.12	964.889	652.804	652.057	698.715	5.13875e-07	-0.611838	3.47155e-08	-12.0195	0.654363	6.28914
GNG2	319.846	259.367	272.351	321.148	322.404	541.628	567.629	535.638	5.83441e-07	0.880144	4.13013e-08	11.8385	1.84056	6.234
RNF146	575.307	574.444	551.646	626.007	582.096	859.265	850.894	858.689	5.20675e-07	0.558918	3.53907e-08	11.9994	1.47316	6.28343
CPEB4	1292.6	1269.11	1220.77	1272.9	1245.29	856.709	914.196	910.73	4.99347e-07	-0.495934	3.34029e-08	-12.06	0.709102	6.3016
RBM19	1317.1	1268.34	1316.51	1290.32	1278.96	955.745	954.7	936.731	4.99347e-07	-0.447626	3.33758e-08	-12.0609	0.733249	6.3016
CHD1	1333.51	1422.51	1296.74	1322.01	1285.45	925.117	934.884	894.593	5.02354e-07	-0.536121	3.36477e-08	-12.0523	0.689623	6.29899
FGFR1	2347.16	2354.17	2278.67	2661.65	2429.29	3761.64	3627.64	3593.73	4.7676e-07	0.602414	3.13387e-08	12.1273	1.51826	6.3217
TMEM108	457.795	515.962	468.761	443.213	470.359	287.161	252.541	249.7	6.57399e-07	-0.842918	4.75721e-08	-11.6929	0.557515	6.18217
HBEGF	497.59	538.717	457.921	608.461	553.416	250.004	209.637	191.504	6.8113e-07	-1.29508	4.96845e-08	-11.6485	0.407513	6.16677
BNIP3	1482.74	1421.28	1625.35	1606.69	1550.13	2241.37	2268.74	2360.55	4.83673e-07	0.576591	3.18332e-08	12.1107	1.49132	6.31545
TBRG4	1259.92	1313.09	1320.44	1278.9	1299.46	896.76	901.532	963.439	5.13464e-07	-0.492407	3.46452e-08	-12.0217	0.710838	6.28949
TUBA4A	1061.72	1003.04	1101.34	941.743	925.837	608.011	590.796	581.729	5.55593e-07	-0.759701	3.86392e-08	-11.9077	0.590619	6.25524
TRAF4	866.505	850.638	946.429	900.596	994.388	486.66	547.759	556.034	5.68296e-07	-0.78243	3.98052e-08	-11.8768	0.581387	6.24543
FAM219A	1087.25	1163.76	1126.02	1129.89	1167.82	804.414	798.488	742.666	5.31694e-07	-0.537729	3.64922e-08	-11.9673	0.688854	6.27434
OAF	1409.12	1430.24	1309.56	1681.57	1583.2	2598.04	2601.53	2559.89	4.94937e-07	0.808148	3.27797e-08	12.0798	1.75096	6.30545
UBE2Z	2205.1	2148.11	2086.24	2344.82	2271.22	3204.63	3203.12	3101.91	4.95147e-07	0.52084	3.28757e-08	12.0768	1.43479	6.30527
TEX10	1201.68	1230.16	1288.86	1230.35	1225.41	848.726	889.599	896.77	5.29011e-07	-0.492372	3.61967e-08	-11.9758	0.710856	6.27653
CACYBP	1701.36	1727.96	1953.04	1550.6	1598.55	971.461	978.247	983.072	5.18761e-07	-0.798236	3.51746e-08	-12.0058	0.575052	6.28503
SMOC1	242.25	257.498	191.394	442.551	316.171	1006.56	1057.55	994.64	6.04416e-07	1.87142	4.30366e-08	11.796	3.65893	6.21866
ETF1	4922.16	4781.01	5035.03	4735.26	4786.48	3450.49	3620.03	3565.26	5.02354e-07	-0.45259	3.36873e-08	-12.0511	0.73073	6.29899
ZFR2	215.614	226.041	240.809	208.609	212.362	117.591	112.057	113.891	8.55986e-07	-0.944436	6.64127e-08	-11.3553	0.519633	6.06753
EPRS1	3665.31	3837.33	3783.68	3945.78	3708.15	2732.61	2740.09	2830.4	5.07106e-07	-0.452436	3.40481e-08	-12.0399	0.730808	6.2949
ZMYND8	1134.25	1155.94	1091.47	1284.11	1074.78	2007.95	1859.49	1768.88	5.15443e-07	0.711136	3.49069e-08	12.0138	1.63709	6.28782
FADS2	4141.52	3710.08	4111.29	2987.52	3355.95	8239.68	7628.18	8458.96	5.26975e-07	1.15676	3.595e-08	11.9829	2.22956	6.27821
SFMBT1	435.261	415.124	425.363	388.85	404.322	213.497	175.281	235.141	7.44045e-07	-1.0027	5.56074e-08	-11.5339	0.499065	6.1284
SOX12	535.464	500.994	487.49	598.277	498.534	957.139	877.575	855.232	5.79695e-07	0.777328	4.06517e-08	11.8549	1.71395	6.2368
AQP1	85.9306	81.3304	97.6501	68.6194	61.2088	191.641	195.288	209.829	8.84017e-07	1.34919	6.94669e-08	11.3104	2.54769	6.05354
TWIST1	295.344	256.731	237.797	279.403	299.054	528.439	473.405	498.398	6.74151e-07	0.872106	4.90637e-08	11.6613	1.83033	6.17124
CAMK2G	707.1	674.6	597.04	639.767	660.389	1045.66	1028.19	978.626	5.63043e-07	0.636159	3.9244e-08	11.8915	1.55419	6.24946
CMTM6	1573.61	1453.58	1479.32	1558.55	1572.05	2124.48	2407.28	2399.2	5.15443e-07	0.595559	3.49009e-08	12.014	1.51106	6.28782
ENSG00000286190	172.792	196.974	195.347	201.203	208.42	326.376	339.951	355.799	7.47176e-07	0.807262	5.59267e-08	11.5281	1.74989	6.12658
H2AZ2	1433.63	1329.3	1374.71	1317.7	1352.62	1860.94	2074.2	1992.44	5.21396e-07	0.536553	3.5483e-08	11.9966	1.4505	6.28283
STX6	915.578	898.802	949.368	928.122	928.679	644.146	669.853	657.185	5.83441e-07	-0.491782	4.12749e-08	-11.8392	0.711146	6.234
PPP4R4	120.62	121.361	117.408	151.468	131.363	240.255	258.676	253.103	8.26814e-07	0.970202	6.35325e-08	11.3997	1.95911	6.08259
MAN1B1	1112.8	1096.32	1137.85	1278.89	1141.04	1691.66	1786.59	1843.24	5.29862e-07	0.622363	3.63226e-08	11.9722	1.53939	6.27584
PRDM15	487.401	486.622	500.353	472.769	498.008	696.588	764.866	709.702	6.21807e-07	0.565001	4.46357e-08	11.7584	1.47939	6.20634
DPYSL3	1158.77	1155.93	1062.84	1226.04	1079.94	1678.84	1669.57	1737.63	5.38706e-07	0.578471	3.73502e-08	11.943	1.49327	6.26865
CYTL1	123.636	96.3872	116.445	109.852	104.752	213.022	219.672	207.425	8.79129e-07	0.955537	6.90099e-08	11.317	1.9393	6.05595
MARK1	156.336	140.524	144.08	141.068	145.292	69.5855	75.8128	70.1186	9.98607e-07	-1.01957	8.21049e-08	-11.1449	0.493265	6.00061
PRNP	2837.63	2939.24	2761.26	2890.2	2797.4	3863.57	3960.03	3783.77	5.35616e-07	0.443766	3.69485e-08	11.9543	1.36015	6.27115
TUBE1	445.472	463.621	446.094	435.77	441.438	293.391	270.959	249.64	7.50216e-07	-0.722841	5.62786e-08	-11.5218	0.605903	6.12481
ELN	192.16	153.051	203.267	147.548	191.411	418.494	361.286	385.981	7.90114e-07	1.13899	6.01653e-08	11.4544	2.20227	6.10231
RRP12	1012.62	1127.8	1063.86	1170.95	1162.13	717.353	681.855	699.342	6.0664e-07	-0.660491	4.33324e-08	-11.7889	0.632663	6.21707
MSI1	118.592	143.003	120.369	146.191	146.035	54.3316	53.6669	47.5596	1.06099e-06	-1.37065	9.00572e-08	-11.0542	0.386717	5.97429
INPP5K	554.868	562.41	579.293	608.748	592.526	358.714	378.854	384.806	7.10055e-07	-0.631601	5.22065e-08	-11.598	0.64546	6.14871
FBXO21	918.631	982.662	897.06	956.774	907.197	1289.05	1321.39	1350.99	5.82201e-07	0.502438	4.10204e-08	11.8456	1.41661	6.23493
TIMM50	1317.14	1357.89	1366.82	1310	1375.11	996.217	967.484	989.64	5.94369e-07	-0.45054	4.21241e-08	-11.8181	0.731769	6.22594
INKA2	358.71	335.243	352.289	379.05	362.646	198.886	215.486	216.067	8.36713e-07	-0.766587	6.45706e-08	-11.3834	0.587807	6.07742
C5orf15	964.601	999.95	920.748	1093.78	1020.88	1583.28	1513.5	1493.56	5.83441e-07	0.615417	4.12665e-08	11.8394	1.532	6.234
PEX26	652.957	632.26	604.938	704.845	660.405	964.535	961.923	990.748	6.31017e-07	0.580922	4.54014e-08	11.7409	1.4958	6.19996
MRPL52	1251.75	1306.14	1310.57	1165.32	1226.25	820.759	853.204	855.32	6.1149e-07	-0.56967	4.38444e-08	-11.7768	0.673771	6.21361
RPLP0P2	293.276	262.921	269.398	354.296	328.566	571.719	596.275	570.3	7.32083e-07	0.950644	5.44329e-08	11.5556	1.93274	6.13544
ITM2B	3840.08	3901.76	3712.59	3858	3911.73	5238.87	5312.83	5072.17	5.80534e-07	0.437796	4.07587e-08	11.8522	1.35453	6.23617
LDLRAP1	593.685	527.808	596.069	561.849	539.916	849.377	840.481	840.245	6.53274e-07	0.583022	4.71652e-08	11.7017	1.49798	6.1849
LOXL2	2928.62	3064.89	3146.13	3093.42	2953.64	4522.42	4115.91	4608.71	5.82201e-07	0.538674	4.10132e-08	11.8458	1.45264	6.23493
CYBRD1	2004.84	1873.63	1971.76	1878.75	1847.88	2665.45	2692.45	2932.34	5.82201e-07	0.528328	4.09367e-08	11.8477	1.44226	6.23493
DUSP10	222.756	214.777	196.373	227.754	198.52	386.197	343.588	376.368	8.30062e-07	0.799825	6.39885e-08	11.3925	1.74089	6.08089
FBXO28	1693.17	1694.35	1703.35	1655.5	1651.11	1208.57	1270.39	1260.86	5.9886e-07	-0.430323	4.25417e-08	-11.8079	0.742095	6.22267
FANCE	334.159	376.154	395.747	368.866	387.92	212.052	208.476	191.678	8.68111e-07	-0.866703	6.77852e-08	-11.3348	0.548399	6.06142
BFSP1	99.1561	92.0009	96.6882	85.3695	98.6437	183.569	169.956	179.349	1.0027e-06	0.915866	8.25335e-08	11.1398	1.8867	5.99883
ARL10	489.471	394.798	410.512	473.495	435.775	739.221	737.589	739.119	7.04432e-07	0.749266	5.17347e-08	11.6073	1.68094	6.15216
IDH1	1189.45	1134.17	1250.35	1001.41	1059.99	1833.05	1846.11	1957.71	6.01755e-07	0.741261	4.27973e-08	11.8017	1.67164	6.22058
CRIP2	689.769	681.303	645.388	586.692	623.154	1057.11	965.682	1047.43	6.57399e-07	0.666776	4.75557e-08	11.6933	1.58752	6.18217
TMEM255B	186.007	176.59	178.6	162.458	175.16	286.09	318.015	295.724	8.86501e-07	0.770404	6.97356e-08	11.3066	1.70575	6.05232
DEAF1	425.12	457.926	425.319	467.424	438.365	716.934	645.941	682.407	7.18162e-07	0.622185	5.31597e-08	11.5796	1.5392	6.14378
LYNX1	214.625	222.347	220.05	210.128	252.737	364.245	408.722	412.708	8.40386e-07	0.821618	6.49237e-08	11.378	1.76739	6.07552
HHIPL1	167.621	171.435	193.415	189.486	191.642	302.959	312.914	327.141	8.86589e-07	0.785213	6.9983e-08	11.303	1.72335	6.05228
RRP7A	1152.62	1146.57	1194.13	1132.57	1173.07	693.434	784.067	813.057	6.64426e-07	-0.60667	4.81907e-08	-11.6797	0.656711	6.17755
TMEM134	202.36	202.495	223.02	214.558	210.488	354.447	328.883	338.982	8.68111e-07	0.69323	6.77754e-08	11.335	1.6169	6.06142
FERMT2	2371.66	2302.57	2445.48	2261.61	2186.84	1673.48	1600.75	1609.1	6.0664e-07	-0.50615	4.33458e-08	-11.7886	0.704099	6.21707
TTLL7	832.791	878.305	855.625	772.263	810.922	508.188	551.751	540.433	7.2324e-07	-0.637368	5.36933e-08	-11.5695	0.642885	6.14072
CORO2A	319.854	344.182	344.419	320.272	293.905	178.304	179.319	155.559	9.4278e-07	-0.925085	7.58819e-08	-11.2227	0.526649	6.02559
ZBED1	1324.28	1269.05	1349.06	1346.49	1407.93	1827.9	1894.46	1977.22	6.26186e-07	0.504187	4.50019e-08	11.75	1.41832	6.2033
ABHD3	652.986	686.543	744.1	600.629	734.343	365.564	383.073	366.885	7.90114e-07	-0.875331	6.01885e-08	-11.454	0.545129	6.10231
PCDH18	395.506	335.962	257.513	497.721	388.309	1067.65	1047.44	992.764	7.43666e-07	1.49898	5.5479e-08	11.5363	2.82644	6.12862
BRD3OS	336.176	334.749	321.717	327.281	319.002	525.23	483.832	484.977	8.13232e-07	0.601638	6.23541e-08	11.4185	1.51744	6.08979
ABCA7	181.967	184.118	161.794	203.933	173.176	378.129	365.283	314.816	9.15587e-07	0.962461	7.32378e-08	11.2578	1.94863	6.0383
RESF1	438.38	449.399	408.548	454.521	403.988	690.033	637.776	673.344	7.71815e-07	0.632087	5.8171e-08	11.4884	1.54981	6.11249
MEDAG	93.0152	92.1121	86.8204	111.698	80.5214	191.438	188.905	195.61	1.0748e-06	1.05999	9.14078e-08	11.0397	2.08492	5.96867
DIRAS1	620.285	609.691	608.878	604.996	590.523	931.862	879.299	1048.02	7.2324e-07	0.647576	5.36111e-08	11.571	1.56653	6.14072
SLC2A3	1159.81	1076.38	1049.02	1275.32	1095.33	1741.53	1810.01	1888.4	6.58058e-07	0.683818	4.76743e-08	11.6907	1.60639	6.18174
TLE4	732.66	740.16	730.283	732.48	724.035	529.129	493.66	518.995	7.71815e-07	-0.510924	5.82828e-08	-11.4864	0.701773	6.11249
MPI	826.694	764.925	753.943	718.325	719.441	1178.44	1131.19	1101.89	7.02498e-07	0.589094	5.15344e-08	11.6112	1.5043	6.15335
RTCA	1366.18	1332	1408.28	1266.69	1351.03	916.713	968.838	936.863	6.90789e-07	-0.515476	5.04464e-08	-11.633	0.699562	6.16065
PARD6G	148.212	175.856	153.926	170.41	172.697	288.781	338.199	295.259	9.63213e-07	0.903318	7.84846e-08	11.1894	1.87036	6.01628
GNA13	2876.48	2707.78	2966.53	2707.3	2694.03	1825.36	1989.65	1953.49	6.52832e-07	-0.537169	4.70793e-08	-11.7036	0.689122	6.1852
SARM1	85.8794	86.85	94.7199	95.0473	86.5685	161.944	170.345	161.879	1.12217e-06	0.880669	9.65956e-08	10.9859	1.84123	5.94994
FBXL16	127.792	121.206	123.32	115.583	114.766	224.991	220.768	201.267	1.05397e-06	0.836205	8.87627e-08	11.0684	1.78535	5.97717
PNPLA3	133.861	124.126	110.508	115.854	110.714	224.917	234.586	210.399	1.05821e-06	0.911336	8.92073e-08	11.0635	1.88079	5.97543
FBXO32	250.399	253.322	222.995	259.483	242.16	390.192	410.371	388.471	9.04358e-07	0.692142	7.22026e-08	11.272	1.61568	6.04366
VLDLR	474.203	489.582	559.532	539.12	516.467	296.786	285.871	310.486	8.88917e-07	-0.790898	7.0294e-08	-11.2986	0.577984	6.05114
TMED3	1665.6	1660.55	1731.95	1705.62	1706.05	2271.99	2354.66	2556.96	6.72889e-07	0.497949	4.88603e-08	11.6656	1.4122	6.17206
OGFOD1	1617.54	1519.2	1561.24	1516.97	1577.22	1114.19	1060.43	1157.33	7.02498e-07	-0.48893	5.14807e-08	-11.6123	0.712554	6.15335
MAGOH	940.075	920.526	883.25	872.748	939.145	636.421	591.966	635.188	7.71815e-07	-0.55283	5.82771e-08	-11.4865	0.681682	6.11249
TRAF2	571.198	585.835	659.256	627.919	615.019	381.062	349.794	384.336	8.64194e-07	-0.716858	6.72644e-08	-11.3425	0.608421	6.06339
MARCKSL1	2108.05	2280.13	2137.56	2168.9	2081.85	2927.3	3073.39	2941.53	6.75853e-07	0.468267	4.92436e-08	11.6576	1.38345	6.17015
ZNF76	550.767	575.471	515.138	561.083	580.535	844.719	809.713	806.379	7.76923e-07	0.560152	5.88617e-08	11.4765	1.47442	6.10962
MOAP1	871.641	880.705	920.749	883.082	920.115	604.774	647.43	630.838	7.76316e-07	-0.512948	5.8687e-08	-11.4795	0.700789	6.10996
CSDC2	100.218	137.75	129.248	157.437	119.999	279.001	301.75	284.812	1.04976e-06	1.17546	8.8321e-08	11.0733	2.25866	5.97891
RPS6KL1	115.431	121.075	113.51	107.503	120.704	58.4804	44.8145	45.6987	1.33059e-06	-1.23003	1.20331e-07	-10.774	0.42631	5.87596
KCNK6	384.233	377.699	335.513	376.511	421.372	191.764	195.008	209.537	1.01717e-06	-0.92789	8.40617e-08	-11.1217	0.525627	5.99261
CLTB	1664.56	1704.73	1799.08	1612.19	1658.01	1177.8	1107.19	1207.51	7.15957e-07	-0.536054	5.28778e-08	-11.585	0.689654	6.14511
MSX1	396.483	433.108	435.217	417.343	417.94	260.778	274.007	263.828	9.59802e-07	-0.657924	7.78795e-08	-11.197	0.63379	6.01782
ZBTB2	512.933	466.744	498.383	471.942	499.773	259.949	310.365	297.423	9.3776e-07	-0.762517	7.53224e-08	-11.23	0.589467	6.02791
CHST14	566.073	540.966	481.583	583.738	557.348	852.951	855.924	917.295	7.94617e-07	0.683179	6.06633e-08	11.4461	1.60567	6.09984
STAT6	2349.17	2290.51	2099.07	2328.33	2184.27	3274.01	3193.09	3146.76	7.00234e-07	0.511197	5.12522e-08	11.6168	1.42523	6.15476
UCHL1	5864.32	6004.16	5989.31	5567.99	6047.88	8098.1	8328.3	8840.92	7.3701e-07	0.514454	5.48603e-08	11.5477	1.42845	6.13253
ELFN2	290.256	310.272	291.094	348.765	304.969	607.897	536.076	510.415	8.93348e-07	0.833975	7.10146e-08	11.2885	1.78259	6.04898
BAZ1A	2121.29	2059.38	2095.15	2070.38	1942.69	1482.64	1391.71	1507.05	7.11605e-07	-0.494763	5.24384e-08	-11.5935	0.709678	6.14776
NEAT1	2108.07	1995.98	1683.56	2153.14	2224.52	6370.41	6117.86	4164.02	7.17878e-07	1.43073	5.30792e-08	11.5812	2.69583	6.14395
FAT1	2898.93	2773.5	2658.62	3114.53	2963.43	4235.06	4540.54	4816.01	7.14686e-07	0.652979	5.27247e-08	11.588	1.57241	6.14588
SPOCK1	394.464	368.068	380.907	438.874	380.689	635.963	601.122	627.923	8.75031e-07	0.664529	6.83981e-08	11.3259	1.58505	6.05798
RSL1D1	3348.52	3271.45	3408.68	3168.2	3158.69	2411.64	2423.62	2393.51	7.11605e-07	-0.440364	5.24175e-08	-11.5939	0.736949	6.14776
GADD45A	601.845	608.299	651.357	541.977	625.344	368.112	360.374	362.024	9.04358e-07	-0.734848	7.22647e-08	-11.2711	0.600881	6.04366
PPARGC1A	83.86	86.7117	92.7311	60.0338	66.5141	181.018	193.877	195.475	1.222e-06	1.30827	1.07979e-07	10.878	2.47645	5.91293
NYNRIN	755.171	765.85	768.754	779.07	759.111	1071.76	1015.57	1103.38	7.76923e-07	0.473877	5.88456e-08	11.4767	1.38884	6.10962
THY1	2816.16	2701.04	2633.95	2317.64	2404.24	4784.39	4079.7	4488.94	7.2324e-07	0.790428	5.37155e-08	11.569	1.72959	6.14072
ADCK2	777.613	733.217	823.061	816.581	832.554	468.119	502.226	528.561	8.61547e-07	-0.673979	6.6987e-08	-11.3467	0.626776	6.06472
RPAP1	1383.56	1420.9	1357.94	1328.17	1434.48	993.309	1020.98	990.781	7.6198e-07	-0.467258	5.72875e-08	-11.5038	0.723338	6.11806
NIP7	1014.66	1033.63	1021.42	962.847	1072.55	659.268	688.465	725.169	8.12475e-07	-0.564199	6.22287e-08	-11.4205	0.676331	6.09019
HCFC1R1	276.96	290.494	271.362	266.379	235.209	504.665	435.46	507.522	9.62195e-07	0.84687	7.83219e-08	11.1914	1.79859	6.01674
ACSF2	729.631	700.195	663.145	664.63	715.194	1041.62	970.535	1011.98	8.06155e-07	0.53789	6.16778e-08	11.4294	1.45185	6.09358
MAFF	1149.54	1218.33	1098.39	1347.64	1277.34	733.64	643.934	599.403	8.22436e-07	-0.888031	6.3128e-08	-11.4061	0.540351	6.0849
MTR	852.218	810.799	799.352	877.937	828.89	1157.94	1167.98	1156.42	7.86183e-07	0.4782	5.96284e-08	11.4634	1.393	6.10448
RAB40B	86.8823	98.2969	94.7303	81.1588	90.1522	164.624	171.634	173.76	1.24722e-06	0.918884	1.11493e-07	10.8472	1.89065	5.90406
EPHB6	287.161	334.756	306.913	258.655	331.987	130.915	132.258	144.194	1.17209e-06	-1.16002	1.01819e-07	-10.9348	0.447508	5.93104
CPNE3	1399.9	1212.79	1263.19	1323.83	1300.18	1838.21	1893.25	1952.53	7.47644e-07	0.544476	5.60237e-08	11.5264	1.45849	6.12631
TSPAN4	1827.06	1788.2	1909.59	1773.95	1920.2	2517.29	2618.55	2796.92	7.3963e-07	0.519566	5.51166e-08	11.5429	1.43352	6.13099
BPGM	781.717	695.965	721.388	735.829	784.204	488.803	454.435	486.316	8.8901e-07	-0.642539	7.04933e-08	-11.2958	0.640585	6.05109
SSR3	5495.43	5432.24	5753.46	5249.45	5429.62	3730.62	3956.21	4039.72	7.70971e-07	-0.485376	5.80273e-08	-11.4909	0.714311	6.11296
SESN2	830.734	1138.55	955.322	1081.12	1003.12	463.805	492.944	438.983	8.98005e-07	-1.10043	7.15337e-08	-11.2812	0.466379	6.04672
SNAP25	74.6585	70.2963	67.0635	67.959	77.8745	152.334	131.585	158.648	1.36384e-06	1.03866	1.24242e-07	10.7434	2.05431	5.86524
MRPS6	916.626	871.859	998.698	855.995	907.827	1397.27	1313.83	1450.17	8.06155e-07	0.608647	6.16527e-08	11.4298	1.52483	6.09358
RUNX1T1	115.482	117.256	109.532	110.726	117.768	47.3199	55.9521	57.5925	1.49315e-06	-1.09447	1.39859e-07	-10.6308	0.468307	5.8259
CDK7	953.361	972.332	983.922	879.654	951.168	608.416	617.066	665.772	8.7877e-07	-0.588978	6.89089e-08	-11.3184	0.664814	6.05612
C1RL	482.338	534.768	442.089	607.017	551.163	996.949	954.212	933.36	8.7877e-07	0.885462	6.88718e-08	11.319	1.84736	6.05612
B3GALT6	317.817	361.438	369.089	402.729	349.065	593.199	599.169	586.628	9.60912e-07	0.722853	7.80582e-08	11.1947	1.65044	6.01732
GFRA1	602.864	535.678	658.27	522.908	571.919	288.437	247.086	307.877	1.03639e-06	-1.04144	8.65949e-08	-11.0926	0.485841	5.98448
GNL3	2082.48	2124.94	2107.97	2047.8	1960.71	1487.57	1451.09	1308.45	7.91795e-07	-0.546066	6.03822e-08	-11.4508	0.684885	6.10139
TCOF1	2265.38	2354.46	2337.92	2368.27	2272.98	1786.03	1731.7	1731.6	7.8663e-07	-0.406597	5.97921e-08	-11.4607	0.754401	6.10423
MKNK2	1694.22	1901.36	1848.41	1666.57	1755.04	2677.96	2545.46	2554.28	7.8663e-07	0.549764	5.97928e-08	11.4606	1.46385	6.10423
EAF1	819.474	831.005	871.438	939.023	841.298	556.513	503.718	561.86	9.18769e-07	-0.669986	7.35686e-08	-11.2534	0.628513	6.03679
LAMP1	6493.75	6366.57	6276.5	6670.42	7129.07	9311.57	10025.3	9883.17	8.47464e-07	0.565038	6.5611e-08	11.3674	1.47943	6.07188
NR2F2	703.026	704.776	672.05	727.308	713.735	972.863	957.6	1000.56	8.86589e-07	0.472756	7.00045e-08	11.3027	1.38776	6.05228
MBP	261.65	290.424	311.83	302.794	313.654	468.335	502.402	531.917	1.04188e-06	0.76118	8.73991e-08	11.0835	1.69488	5.98218
RNF19A	858.344	855.757	939.514	845.032	844.435	531.05	570.832	596.786	9.46567e-07	-0.61841	7.63437e-08	-11.2167	0.651389	6.02385
PSMD6	2158.1	2207.7	2211.59	2009.57	2129.27	1572.63	1526.89	1554.1	8.29526e-07	-0.465725	6.38097e-08	-11.3953	0.724107	6.08117
SOWAHC	486.38	484.038	457.909	471.063	504.937	310.246	311.678	322.729	1.07798e-06	-0.610128	9.17675e-08	-11.0359	0.655139	5.96739
BAIAP2-DT	362.767	363.084	341.44	360.946	378.321	528.011	526.869	534.131	1.03639e-06	0.551905	8.65911e-08	11.0926	1.46602	5.98448
MRTO4	1306.88	1325.36	1347.11	1255.65	1284.99	864.721	957.363	930.743	8.86589e-07	-0.50811	7.00364e-08	-11.3023	0.703143	6.05228
TDRD7	905.342	978.407	921.743	944.71	962.389	655.055	683.283	628.563	9.44199e-07	-0.523878	7.60744e-08	-11.2202	0.6955	6.02494
GIPC3	488.519	524.053	604.926	531.228	492.267	298.859	260.665	244.36	1.12865e-06	-0.979799	9.74846e-08	-10.977	0.507051	5.94744
FKBP1A	2216.35	1996.13	2169.14	2485.99	2208.35	3485.21	3426.94	3526.34	8.43456e-07	0.654965	6.52308e-08	11.3732	1.57458	6.07394
AFMID	270.779	282.183	231.898	235.365	236.343	458.381	521.921	432.334	1.11358e-06	0.905023	9.57214e-08	10.9947	1.87257	5.95328
RTL8C	1487.82	1488.81	1467.46	1685.76	1564.12	2377.52	2197.59	2254.86	8.51083e-07	0.566145	6.59618e-08	11.3621	1.48056	6.07003
WASL	1606.37	1713.08	1677.66	1624.07	1643.97	1122.32	1236.27	1194.41	8.75235e-07	-0.481894	6.84865e-08	-11.3246	0.716037	6.05788
LUCAT1	119.592	130.966	109.511	168.099	143.542	293.709	308.271	283.58	1.28566e-06	1.15001	1.15735e-07	10.8113	2.21916	5.89087
MYLK	1303.87	1255.07	1138.83	1542.19	1308.75	2245.94	2352.17	2531.86	8.61547e-07	0.864815	6.69175e-08	11.3477	1.82111	6.06472
LYRM7	316.782	331.231	314.802	317.675	321.543	454.328	476.953	487.15	1.08676e-06	0.56131	9.28757e-08	11.0241	1.47561	5.96387
UBLCP1	678.494	685.86	665.149	706.586	662.996	915.706	991.799	1004.64	9.41045e-07	0.513071	7.56643e-08	11.2255	1.42708	6.02639
HOXA1	161.435	170.992	174.699	155.924	140.108	71.7744	69.1421	52.5125	1.59612e-06	-1.32579	1.53325e-07	-10.5441	0.398931	5.79693
A4GALT	581.449	549.301	537.821	573.879	544.969	815.892	769.665	797.467	9.79375e-07	0.51022	7.99639e-08	11.1709	1.42427	6.00905
VGLL3	483.28	480.797	506.3	459.97	465.469	321.298	300.689	311.033	1.12511e-06	-0.622589	9.70856e-08	-10.981	0.649504	5.9488
FOXL1	384.248	388.837	361.166	424.13	394.497	599.31	579.91	611.685	1.04476e-06	0.613274	8.77272e-08	11.0799	1.52973	5.98098
VPS37C	666.217	681.666	700.698	689.377	639	439.769	470.895	458.737	1.03991e-06	-0.565546	8.71475e-08	-11.0864	0.6757	5.983
FAM234A	1990.54	1972.86	1989.52	2092.7	2127.5	2785.63	2714.08	2762.37	8.66553e-07	0.437381	6.75199e-08	11.3388	1.35414	6.0622
ENSG00000170846	200.272	181.946	177.625	168.676	179.63	301.898	345.662	305.725	1.2476e-06	0.80761	1.11688e-07	10.8455	1.75031	5.90392
FTH1P2	1016.76	1147.29	1093.44	1134.15	981.799	1886.74	1925.62	1615.06	8.8901e-07	0.749956	7.0503e-08	11.2957	1.68174	6.05109
EIF2S2P4	1100.48	1130.34	1134.92	1060.78	1137.96	820.546	797.586	785.771	9.51778e-07	-0.473251	7.68428e-08	-11.2102	0.72034	6.02146
THBS2	223.835	188.462	176.602	257.824	210.295	423.695	414.747	453.198	1.19895e-06	1.03621	1.05246e-07	10.9028	2.05083	5.9212
ARRDC3	487.481	525.015	519.06	603.274	524.205	829.214	983.406	917.421	9.94403e-07	0.775153	8.16031e-08	11.1509	1.71137	6.00244
EIF5	5348.24	5514.56	5342.94	5293.93	5518.56	4174.69	3984.49	3959.52	8.90287e-07	-0.419799	7.06975e-08	-11.2929	0.747529	6.05047
HCMVUL21	7839.47	8371.81	7568.33	7227.21	8172.34	7317.44	6969.91	6304.32	0.0119712	-0.191836	0.00665046	-3.25476	0.875491	1.92186
INMT	65.4654	86.8947	79.9073	99.466	70.1148	180.482	178.76	199.417	1.52331e-06	1.22925	1.43315e-07	10.6077	2.34445	5.81721
HP1BP3	2458.51	2393.16	2294.48	2358.59	2335.65	3171.37	3147.89	3106.86	8.86589e-07	0.408403	6.9918e-08	11.304	1.32722	6.05228
FADS1	2145.88	1907.08	2073.4	1761.6	1799.5	3173.1	3064.16	3383.9	8.8901e-07	0.730134	7.05224e-08	11.2954	1.65879	6.05109
GAR1	756.122	761.974	799.395	701.429	764.733	517.19	464.13	489.87	1.05923e-06	-0.625739	8.93817e-08	-11.0616	0.648088	5.97501
MXD1	338.221	379.784	385.89	403.792	370.817	217.973	204.672	177.98	1.30469e-06	-0.912159	1.17556e-07	-10.7963	0.531389	5.88449
CC2D2A	424.046	402.022	403.631	396.544	401.603	578.418	579.416	573.407	1.08796e-06	0.509265	9.30681e-08	11.0221	1.42332	5.96339
GAL	791.954	932.557	813.169	947.272	947.701	363.979	496.619	385.873	1.08676e-06	-1.10212	9.28024e-08	-11.0249	0.465832	5.96387
BEX3	2293.02	2246.21	2232.28	2428.55	2351.78	3121.3	3151.72	3096.35	8.96537e-07	0.435506	7.13425e-08	11.2839	1.35238	6.04743
CD276	2178.58	2122.83	2206.63	2420.8	2258.91	3102.82	3206.72	3311.78	8.98959e-07	0.520356	7.16842e-08	11.2791	1.43431	6.04626
PGM2	1268.08	1263.9	1340.19	1165.39	1178.11	825.146	754.132	829.639	9.79376e-07	-0.629242	8.01264e-08	-11.1689	0.646516	6.00905
IMPA2	212.6	201.454	256.567	243.924	199.08	435.287	393.438	461.753	1.23134e-06	0.954711	1.09147e-07	10.8676	1.93819	5.90962
KIF21B	240.104	215.69	215.141	252.217	226.264	107.542	117.459	127.32	1.51299e-06	-0.97328	1.42219e-07	-10.615	0.509347	5.82016
ITPK1	1241.56	1320.61	1425.04	1179.88	1278.56	833.422	818.553	798.598	9.79376e-07	-0.655015	8.00487e-08	-11.1699	0.635069	6.00905
ATP10D	596.736	544.308	567.451	573.204	555.504	825.916	779.714	838.207	1.03639e-06	0.521486	8.6265e-08	11.0963	1.43543	5.98448
WBP1L	1162.85	1137.83	1139.83	1296.29	1166.93	1682.54	1690.89	1679.53	9.31084e-07	0.514439	7.4709e-08	11.2381	1.42844	6.03101
HARS1	2005.86	2076.54	2180.01	2149.99	2108.68	1525.46	1466.2	1581.79	9.20363e-07	-0.465086	7.37725e-08	-11.2506	0.724428	6.03604
ERLIN2	850.168	910.198	864.498	950.81	930.558	1278.63	1269.48	1367.14	9.62195e-07	0.534502	7.82808e-08	11.1919	1.44844	6.01674
ZBTB5	487.393	548.987	579.334	519.733	507.568	323.959	307.757	317.981	1.19839e-06	-0.737237	1.04998e-07	-10.905	0.599887	5.9214
MAN1A1	975.904	925.276	970.063	1054.34	1048.87	1406.13	1453.53	1499.33	9.54538e-07	0.547858	7.71448e-08	11.2064	1.46191	6.02021
ADGRG1	926.834	963.461	913.823	1024.21	960.399	1323.6	1375.6	1333.28	9.69146e-07	0.49052	7.90483e-08	11.1823	1.40495	6.01361
KCTD15	366.846	410.739	416.473	421.817	411.172	224.237	254.261	237.479	1.30657e-06	-0.76531	1.17834e-07	-10.794	0.588327	5.88387
NBEAL2	997.338	1057.54	902.964	960.027	1005.13	663.275	629.909	607.057	1.04936e-06	-0.63479	8.82007e-08	-11.0746	0.644034	5.97907
CTSB	10132.5	10701.5	10328.6	11596.1	11313.4	15750.4	16464.3	16901	1.03666e-06	0.599651	8.67893e-08	11.0904	1.51535	5.98436
SLC35F2	1083.12	1058.63	1085.57	1021.76	987.243	706.532	751.255	721.478	1.03666e-06	-0.526858	8.67573e-08	-11.0908	0.694065	5.98436
MRGPRF	687.711	650.282	751.008	686.493	649.073	1059.58	982.597	1034.64	1.03229e-06	0.583493	8.57386e-08	11.1024	1.49847	5.9862
UBE2E3	1003.43	1033.61	982.927	933.338	928.701	1399.47	1353.08	1365.3	9.82661e-07	0.49265	8.0558e-08	11.1636	1.40703	6.0076
CCT6A	5556.73	5568.64	6187.7	5201.88	5555.27	3523.22	3853.36	3764.34	9.59802e-07	-0.59496	7.78447e-08	-11.1974	0.662063	6.01782
FTLP3	764.36	830.672	787.509	758.283	783.248	1208.9	1081.89	1246.65	1.01717e-06	0.58485	8.39799e-08	11.1227	1.49988	5.99261
MUS81	761.243	827.583	806.296	772.486	807.727	555.839	557.427	558.913	1.09837e-06	-0.510535	9.40494e-08	-11.0119	0.701962	5.95925
C3orf70	159.402	163.104	167.78	137.549	153.931	78.2455	72.4382	76.1717	1.74359e-06	-1.0417	1.72133e-07	-10.4358	0.485754	5.75856
SMTN	2259.25	2354.47	2237.25	2363.08	2364.21	1745.93	1594.29	1536.13	9.59802e-07	-0.512388	7.78884e-08	-11.1969	0.701061	6.01782
UPP1	662.129	651.416	729.324	685.051	720.035	367.994	398.005	455.146	1.17902e-06	-0.764196	1.02812e-07	-10.9254	0.588782	5.92848
DHX40	656.021	623.627	652.318	658.879	640.599	871.179	877.732	898.024	1.06099e-06	0.450444	9.00357e-08	11.0545	1.36646	5.97429
BMPR1B	115.449	106.995	115.477	119.667	111.015	45.2834	56.8393	56.012	1.86715e-06	-1.11556	1.88665e-07	-10.3506	0.461512	5.72882
GABPB1	465.953	471.923	487.524	472.799	448.871	310.243	317.648	316.093	1.25823e-06	-0.575704	1.13057e-07	-10.8338	0.670959	5.90024
RHOB	2218.42	2317.11	2200.71	2390.55	2292.54	3014.99	3155.48	3215.61	9.59802e-07	0.454111	7.76844e-08	11.1995	1.36994	6.01782
PBXIP1	844.087	878.774	896.052	1100.43	993.06	1575.83	1698.34	1621.44	9.98607e-07	0.798208	8.21136e-08	11.1448	1.73894	6.00061
RRAGB	123.657	141.53	106.557	132.438	129.793	228.555	249.464	250.493	1.5244e-06	0.940731	1.43544e-07	10.6062	1.9195	5.8169
STEAP3	924.77	846.115	863.498	949.788	880.452	1268.08	1241.07	1278.59	1.02284e-06	0.500973	8.46995e-08	11.1143	1.41517	5.99019
SLC38A7	1004.46	950.598	975.023	1041.64	1080.19	1592.91	1419.67	1497.82	1.00392e-06	0.573001	8.27172e-08	11.1376	1.48762	5.9983
STING1	1181.28	1156.59	1123.03	1172.97	1139.15	1536.26	1502.78	1542.13	1.00862e-06	0.403725	8.3188e-08	11.132	1.32292	5.99627
GABPB1-IT1	156.341	159.607	144.072	138.383	160.828	268.684	281.637	248.209	1.50219e-06	0.809791	1.40831e-07	10.6243	1.75296	5.82327
LZTS2	1028	1054.85	1053.96	1132.39	1111.75	1572.57	1484.8	1472.52	1.02304e-06	0.488944	8.48013e-08	11.1131	1.40342	5.99011
CCSER2	1272.16	1262.21	1262.22	1220.03	1276.29	925.521	865.932	947.372	1.06099e-06	-0.464144	8.98249e-08	-11.0568	0.724901	5.97429
EPB41L4B	123.672	131.877	116.432	112.325	128.008	60.221	57.7998	57.3992	1.9332e-06	-1.05666	1.97583e-07	-10.3079	0.480743	5.71372
TMEM230	1489.82	1439.86	1405.3	1372.32	1353.5	1975.7	1890.45	1937.93	1.02146e-06	0.454531	8.45011e-08	11.1166	1.37034	5.99078
ENOSF1	558.96	544.209	540.791	555.755	554.544	757.293	741.503	756.937	1.1699e-06	0.449027	1.01435e-07	10.9384	1.36512	5.93185
TBC1D9B	2809.03	2788.96	2801.72	2995.79	2836.02	3735.13	3835.5	3830.72	1.03014e-06	0.417434	8.54752e-08	11.1054	1.33555	5.9871
BMERB1	528.327	553.638	491.431	630.281	551.014	951.734	900.387	872.243	1.15736e-06	0.725152	1.00252e-07	10.9498	1.65307	5.93653
TYSND1	193.137	172.34	195.393	233.073	215.043	353.185	373.536	379.953	1.4519e-06	0.876839	1.35033e-07	10.6641	1.83635	5.83806
PURB	1542.95	1581.42	1622.43	1640.94	1688.31	1079.16	1182.14	1168.83	1.06099e-06	-0.498613	8.99444e-08	-11.0555	0.707787	5.97429
NIFK	722.414	691.079	775.706	671.063	683.722	458.32	456.173	462.784	1.24449e-06	-0.624238	1.111e-07	-10.8505	0.648762	5.90501
MRPS26	469.027	464.065	495.411	460.558	457.413	648.876	682.153	668.323	1.22551e-06	0.506413	1.0839e-07	10.8743	1.42051	5.91168
PXDN	5741.69	5520.22	5258.04	6423.74	5788.25	8773.25	8918.26	9189.61	1.08485e-06	0.643998	9.24427e-08	11.0287	1.56265	5.96463
ECPAS	2363.47	2357.92	2313.24	2339.68	2421	1647.83	1829.48	1687.23	1.03639e-06	-0.456064	8.65011e-08	-11.0937	0.728972	5.98448
ATF6B	1109.69	1176.04	1078.66	1111.84	1039.69	1635.16	1585.77	1504.34	1.05992e-06	0.514215	8.96157e-08	11.059	1.42822	5.97472
PSMC4	3043.01	2938.33	3038.59	2981.13	2893.73	2319.36	2219.63	2212.59	1.03574e-06	-0.404686	8.61112e-08	-11.0981	0.755401	5.98475
DYNC1LI1	1601.21	1617.55	1632.29	1491.76	1562.5	1138.44	1124.41	1178.16	1.06851e-06	-0.462798	9.07847e-08	-11.0464	0.725578	5.97122
NOC2L	2732.36	2909.19	2895.5	2702.38	2736.48	2097.03	1992.77	2070.33	1.03639e-06	-0.444706	8.65558e-08	-11.093	0.734734	5.98448
PELI3	238.106	263.111	252.633	244.938	255.358	412.081	382.112	375.766	1.44172e-06	0.636798	1.33727e-07	10.6733	1.55487	5.84112
USP31	493.525	446.861	455.938	467.618	479.952	314.592	309.726	301.671	1.42549e-06	-0.603025	1.31041e-07	-10.6926	0.658372	5.84603
PARD6B	119.594	123.151	128.281	129.75	118.441	54.4157	66.4607	58.5815	2.0477e-06	-1.04663	2.13868e-07	-10.235	0.484098	5.68873
CD46	2381.92	2184.05	2315.18	2171.26	2255.4	3034.62	3080.32	3176.61	1.05992e-06	0.454379	8.9568e-08	11.0596	1.37019	5.97472
CLIC1	10378.7	10393.7	10973	9537.15	10552.5	6853.03	7158.29	7395.46	1.12511e-06	-0.538112	9.70769e-08	-10.9811	0.688672	5.9488
CARD16	143.084	143.022	138.14	211.573	156.414	336.096	333.832	352.191	1.577e-06	1.12253	1.50066e-07	10.5643	2.17728	5.80217
PSMD2	7525.78	7477.84	7972.95	7704.34	7669.12	5354.27	5605.02	5826.3	1.10417e-06	-0.455489	9.47293e-08	-11.0049	0.729263	5.95696
ARAP3	602.893	619.361	552.63	625.102	603.603	843.338	913.113	876.596	1.20277e-06	0.547547	1.05858e-07	10.8972	1.4616	5.91982
MFHAS1	1018.77	1063.75	1019.44	1028.64	1049.19	716.49	782.911	708.152	1.18352e-06	-0.495521	1.03401e-07	-10.9199	0.709306	5.92683
TEAD2	533.408	608.292	537.838	553.237	552.911	879.104	807.572	811.029	1.22045e-06	0.580239	1.0774e-07	10.8801	1.4951	5.91348
NRSN2	689.746	688.36	668.102	751.6	694.785	1054.03	968.226	999.983	1.17745e-06	0.528498	1.0248e-07	10.9285	1.44243	5.92906
DELE1	525.215	504.653	520.082	516.049	531.499	719.176	708.475	760.991	1.24722e-06	0.489388	1.11551e-07	10.8466	1.40385	5.90406
RNF20	1005.48	1009.37	1000.69	999.194	989.804	1303.92	1294	1329.65	1.12217e-06	0.387356	9.66458e-08	10.9854	1.30799	5.94994
GFUS	964.668	1002.99	1054.94	968.563	992.93	693.909	620.475	699.233	1.20832e-06	-0.571702	1.06469e-07	-10.8916	0.672822	5.91782
NSMF	1059.7	1154.86	1161.52	1007.46	1046.19	1731.16	1614.51	1571.52	1.10869e-06	0.594588	9.52087e-08	11	1.51004	5.95519
CELF1	2204.1	2270.62	2317.18	2390.69	2487.14	1648.4	1676.69	1526.35	1.085e-06	-0.529364	9.25452e-08	-11.0276	0.69286	5.96457
PXDC1	940.067	968.098	897.072	858.048	878.899	592.016	632.405	614.237	1.23603e-06	-0.566975	1.09935e-07	-10.8607	0.675031	5.90797
RNMT	1397.86	1404.51	1449.73	1433.93	1355.3	1057.82	1060.03	1026.23	1.13558e-06	-0.42586	9.81791e-08	-10.9701	0.744395	5.94478
OXTR	122.647	117.987	155.942	124.567	115.891	47.9519	53.1438	53.1697	2.12274e-06	-1.31418	2.24168e-07	-10.1919	0.402153	5.6731
BSG	9122.94	9376.44	9121.64	10043.7	9714.77	13378.3	13187.5	13369.7	1.19772e-06	0.49143	1.0484e-07	10.9065	1.40584	5.92165
RAB6B	500.734	485.441	532.9	493.324	519.244	345.045	311.9	330.605	1.44172e-06	-0.621949	1.33718e-07	-10.6734	0.649792	5.84112
SLC66A3	207.434	169.709	198.353	162.503	197.704	339.985	337.783	395.013	1.58191e-06	0.937258	1.50682e-07	10.5605	1.91489	5.80082
PTGES	634.613	612.123	458.839	1028.83	774.646	2307.3	2543.14	2271	1.17021e-06	1.80748	1.01559e-07	10.9373	3.5003	5.93174
ANKLE2	2308.33	2378.39	2342.83	2334.25	2365.68	1778.52	1851.5	1778.48	1.10389e-06	-0.379845	9.46135e-08	-11.0061	0.76852	5.95708
C2orf68	339.28	327.581	335.516	369.612	342.064	558.195	525.446	498.339	1.4081e-06	0.620503	1.29091e-07	10.7069	1.53741	5.85137
FAR2	428.179	442.406	449.017	434.509	417.735	254.811	273.721	296.631	1.53013e-06	-0.661765	1.44591e-07	-10.5994	0.632105	5.81527
PIP4K2C	1364.16	1457.97	1464.52	1542.18	1446.46	1034.06	1042.7	1047.67	1.1776e-06	-0.481259	1.02591e-07	-10.9275	0.716352	5.929
PGRMC2	1329.41	1253.35	1255.29	1419.13	1339.74	1960.68	2227.83	1913.36	1.13558e-06	0.622551	9.82712e-08	10.9692	1.5396	5.94478
AMPD2	936.048	939.159	929.603	1115.09	1000.73	1536.12	1604.01	1466.66	1.18352e-06	0.644673	1.03344e-07	10.9204	1.56338	5.92683
DKK3	6611.26	6308.71	6475.84	6348.22	6321.36	8383.46	8582.92	8920.41	1.20277e-06	0.427973	1.0588e-07	10.897	1.34534	5.91982
MXD4	1106.7	1268.8	1264.16	1250.06	1257.02	1751.12	1768.45	1758.05	1.17557e-06	0.51896	1.02219e-07	10.931	1.43292	5.92975
SMIM10	235.018	239.867	223.027	205.925	219.21	440.276	356.026	408.307	1.59612e-06	0.833826	1.52815e-07	10.5472	1.78241	5.79693
EMP2	1078.05	955.639	996.724	1067.49	1053.33	1441.04	1438.93	1469.44	1.19895e-06	0.494329	1.05153e-07	10.9036	1.40867	5.9212
ADAMTS1	327.021	276.548	295.044	351.392	336.907	565.476	580.782	515.368	1.4742e-06	0.805878	1.37473e-07	10.6471	1.74821	5.83144
HSPA8	56144.6	56463.9	60259.4	50507.8	52351.1	35638.8	35027.3	35675.7	1.43156e-06	-0.634879	1.32142e-07	-10.6847	0.643995	5.84419
TTC7A	806.225	779.831	806.277	721.997	806.654	493.883	549.155	500.824	1.38993e-06	-0.607986	1.26965e-07	-10.7227	0.656112	5.85701
PPP1R3E	76.6845	97.395	70.0327	74.1439	76.2236	201.983	170.808	159.912	2.03388e-06	1.1734	2.11245e-07	10.2463	2.25542	5.69167
CCT5	5686.48	5617.04	6235.08	5253.91	5535.56	3896.07	3804.63	3938.17	1.19036e-06	-0.544259	1.04097e-07	-10.9134	0.685743	5.92432
HCMVUS34	5739.64	6422.81	6598.24	6131.04	6746.48	6010.74	5495.29	6483.39	0.284133	-0.0783795	0.230905	-1.26006	0.947121	0.546478
SCFD1	1409.12	1441.48	1472.41	1400.85	1387.85	1082.67	1071	1050.53	1.22743e-06	-0.413246	1.08661e-07	-10.8719	0.750932	5.911
PSMD3	5098.93	5341.92	5144.57	5064.37	5275.93	3977.13	3907.84	3969.61	1.20139e-06	-0.391546	1.0556e-07	-10.8999	0.762312	5.92032
PIM1	748.988	703.098	703.642	671.855	734.479	458.222	459.368	503.545	1.43341e-06	-0.589308	1.32599e-07	-10.6814	0.664662	5.84363
HCMVUL36	19067.4	22117.9	20473.7	22933.8	23245.6	22772.2	19971.3	21028.2	0.824947	-0.0190235	0.789731	-0.272504	0.9869	0.083574
SND1	5694.7	5953.26	5949.84	6201.93	6133.91	4002.3	4320.93	4453.27	1.21973e-06	-0.49197	1.07575e-07	-10.8816	0.711054	5.91374
LIN54	757.182	833.464	775.683	754.998	822.214	531.242	538.64	547.198	1.41118e-06	-0.54845	1.29491e-07	-10.7039	0.683754	5.85042
IRX4	180.885	204.476	208.236	208.735	216.825	111.937	101.518	88.5778	2.06182e-06	-1.01986	2.16197e-07	-10.225	0.493163	5.68575
MYH14	196.229	176.534	220.068	191.143	208.834	84.3818	105.317	80.5395	2.11964e-06	-1.14616	2.2349e-07	-10.1946	0.451826	5.67374
RTN4RL2	195.212	207.714	207.228	219.826	217.443	123.975	98.6353	98.0294	2.04982e-06	-0.980199	2.14429e-07	-10.2325	0.50691	5.68828
PROX1	162.478	166.491	153.945	167.999	165.108	93.3641	91.078	91.2788	2.15311e-06	-0.829522	2.28625e-07	-10.1739	0.562716	5.66693
STIP1	6332.29	6618.62	7008.78	5959.52	5999.81	4302.86	4055.75	4337.84	1.23603e-06	-0.590928	1.09901e-07	-10.861	0.663916	5.90797
ATP11B	1727.94	1768.4	1813.87	1650.12	1755.91	1288.52	1250.26	1305.47	1.24016e-06	-0.443286	1.10508e-07	-10.8557	0.735457	5.90652
LMBRD1	460.9	512.2	504.268	464.642	526.945	812.543	725.491	747.186	1.42841e-06	0.625645	1.31427e-07	10.6898	1.5429	5.84515
LINC00205	653.981	687.569	618.756	703.096	725.88	988.921	1032.18	984.668	1.34458e-06	0.565627	1.21708e-07	10.7631	1.48003	5.87141
SMURF2	1405	1442.55	1441.83	1470.37	1412.15	1104.45	1085.22	1086.32	1.26415e-06	-0.393851	1.13694e-07	-10.8284	0.761095	5.8982
RRAGA	1282.41	1251.63	1339.18	1319.48	1368.17	1756.46	1954.05	2014.31	1.23603e-06	0.538742	1.09775e-07	10.8621	1.45271	5.90797
PLP2	1861.8	1856.4	1816.82	1615.42	1748.11	1244.77	1104.2	1159.67	1.25383e-06	-0.605349	1.12558e-07	-10.838	0.657312	5.90176
ARPC5	3038.9	2644.94	2870.81	2941.34	2874.86	3956.73	4250.13	4387.63	1.23134e-06	0.546668	1.09212e-07	10.8671	1.46071	5.90962
CPD	2662.91	2480.03	2612.24	3132.71	2659.7	4205.65	4465.17	4502.38	1.23868e-06	0.700544	1.10274e-07	10.8577	1.62512	5.90704
BEGAIN	192.149	210.316	220.064	201.555	216.581	109.563	97.3061	74.4841	2.15428e-06	-1.16588	2.29107e-07	-10.1719	0.445692	5.6667
TRAPPC6A	72.5869	63.5032	55.2248	75.1311	61.5559	131.947	137.358	153.237	2.24144e-06	1.10667	2.41349e-07	10.1245	2.15348	5.64947
HCMVUS3	316.9	445.226	464.748	458.17	463.607	557.718	613.042	645.043	0.00111034	0.506163	0.000446544	4.73456	1.42027	2.95455
RAP2B	535.448	532.217	539.814	559.336	543.453	759.093	732.63	806.912	1.43341e-06	0.498568	1.32517e-07	10.682	1.41281	5.84363
ZDHHC18	1231.31	1203.43	1323.41	1174.91	1225.44	823.695	894.951	806.804	1.35382e-06	-0.549292	1.22769e-07	-10.7548	0.683355	5.86844
UBIAD1	554.845	591.097	584.242	634.94	554.74	390.487	355.188	363.973	1.59612e-06	-0.658931	1.52836e-07	-10.5471	0.633348	5.79693
ZNF37BP	274.892	277.671	246.695	261.31	271.605	425.198	429.499	391.383	1.6877e-06	0.641546	1.64854e-07	10.4761	1.56	5.77271
FAM114A1	1556.28	1563.87	1465.48	1668.38	1603.65	2141.66	2348.1	2229.42	1.24866e-06	0.511435	1.11991e-07	10.8429	1.42547	5.90355
CDH4	303.556	330.896	352.288	322.608	338.485	162.265	203.526	173.912	1.90248e-06	-0.878924	1.93812e-07	-10.3257	0.543773	5.72068
OSBPL1A	585.53	539.823	642.452	553.953	551.89	883.533	851.367	869.307	1.43156e-06	0.597359	1.32191e-07	10.6843	1.51294	5.84419
HSPA4L	722.473	627.679	760.867	648.225	611.059	331.071	372.365	381.155	1.59612e-06	-0.896842	1.53432e-07	-10.5435	0.537061	5.79693
SUGT1	1412.19	1443.21	1518.8	1406.04	1389.57	1031.09	1067.03	1055.32	1.32669e-06	-0.447347	1.19869e-07	-10.7776	0.73339	5.87723
PDGFRL	125.693	118.936	105.572	148.203	118.549	246.995	236.792	229.726	2.01529e-06	0.955137	2.08812e-07	10.2569	1.93876	5.69566
PHETA2	300.431	244.707	308.885	316.88	292.265	495.737	487.288	536.089	1.67786e-06	0.795457	1.63419e-07	10.4843	1.73563	5.77524
B4GALT1	1006.53	1014.33	984.876	1347.43	1132.49	1953.6	2139.61	2038.85	1.32058e-06	0.906678	1.19206e-07	10.7829	1.87472	5.87924
CYB561A3	541.583	513.153	550.668	600.943	565.818	816.469	888.479	978.607	1.48024e-06	0.687444	1.38159e-07	10.6424	1.61043	5.82967
HYAL2	697.949	766.796	723.358	751.402	700.626	994.519	1014.53	1064.06	1.43156e-06	0.493517	1.32066e-07	10.6852	1.40787	5.84419
DNASE2	1032.08	1036.78	1029.29	1011.98	1076.53	1346.99	1384.52	1436.21	1.36168e-06	0.421019	1.2382e-07	10.7466	1.33887	5.86592
TSPYL5	612.076	628.94	593.105	649.46	590.739	854.327	905.425	976.989	1.4686e-06	0.568117	1.36829e-07	10.6516	1.48259	5.8331
TMEM129	296.378	309.445	308.865	421.765	431.838	741.47	800.715	749.152	1.59612e-06	1.12943	1.53461e-07	10.5433	2.18772	5.79693
CDK19	454.726	437.26	405.584	477.933	464.323	664.023	671.562	672.602	1.58191e-06	0.581473	1.50796e-07	10.5598	1.49638	5.80082
EMG1	601.809	616.313	572.407	600.333	620.401	330.982	396.495	397.326	1.67577e-06	-0.687538	1.63076e-07	-10.4863	0.620912	5.77579
PIP4K2B	1109.69	1057.68	1059.9	1145.64	1119.76	1449.32	1524.13	1569.18	1.36674e-06	0.462792	1.2462e-07	10.7405	1.37821	5.86431
ZSCAN9	235.016	258.978	258.578	245.14	271.146	145.711	105.364	102.346	2.19899e-06	-1.12388	2.35502e-07	-10.1468	0.45886	5.65778
IMP4	1330.43	1420.04	1439.85	1341.18	1395.74	1024.84	992.564	1028.6	1.40278e-06	-0.447531	1.28371e-07	-10.7122	0.733296	5.85301
RBM47	125.745	151.613	135.171	157.408	161.514	261.437	263.258	266.873	2.03793e-06	0.857188	2.1251e-07	10.2408	1.8115	5.69081
KIF21A	606.975	581.36	633.576	565.29	576.076	399.548	386.043	403.338	1.67577e-06	-0.579361	1.62985e-07	-10.4868	0.66926	5.77579
ELOCP2	240.158	244.858	230.911	219.699	250.144	139.701	123.787	138.381	2.16646e-06	-0.825352	2.30941e-07	-10.1647	0.564344	5.66425
PLD2	394.454	407.917	407.565	383.374	403.17	587.966	557.506	556.961	1.65561e-06	0.508112	1.60428e-07	10.5016	1.42219	5.78104
ALDH1L2	559.93	606.815	534.898	649.85	572.121	354.717	360.015	341.286	1.72231e-06	-0.72942	1.69462e-07	-10.4504	0.603146	5.76389
CARS1	1909.78	1962.83	1828.68	1994.27	1985.86	1454.19	1426.29	1437.74	1.36384e-06	-0.427061	1.24213e-07	-10.7436	0.743776	5.86524
FCGRT	1545.05	1632.85	1652	1728.07	1700.81	2198.69	2334.52	2330.99	1.35378e-06	0.47054	1.22653e-07	10.7557	1.38563	5.86845
ADGRA3	930.905	889.272	858.56	914.208	913.139	1293.79	1185.99	1266.41	1.43156e-06	0.470357	1.32108e-07	10.6849	1.38545	5.84419
RFX5	1079.07	1066.2	1094.44	1025.03	1106.72	1410.95	1435.65	1494.71	1.40511e-06	0.430278	1.28701e-07	10.7098	1.34749	5.85229
SEC23A	2615.87	2346.47	2499.75	2402.69	2416.45	3279.25	3555.91	3639.64	1.36039e-06	0.507193	1.2359e-07	10.7484	1.42128	5.86634
TFDP1	2204.06	2067.11	2212.59	2055.59	2204.26	2904.31	2855.43	3058.23	1.36039e-06	0.452294	1.23504e-07	10.7491	1.36821	5.86634
HECA	760.242	768.68	780.622	742.885	813.633	499.715	522.134	561.689	1.60625e-06	-0.551649	1.54846e-07	-10.5348	0.68224	5.79419
COLGALT1	4848.59	4936.33	4935.35	4474.56	4624.74	6518.82	6519.95	6742.13	1.41599e-06	0.46984	1.30049e-07	10.6998	1.38496	5.84894
DCUN1D5	1182.28	1219.78	1317.48	1236.4	1222.81	739.807	818.17	881.735	1.49062e-06	-0.607158	1.39498e-07	-10.6333	0.656489	5.82663
SLC29A4	412.878	431.02	396.686	414.398	442.577	770.456	653.491	636.675	1.6506e-06	0.706141	1.59806e-07	10.5052	1.63143	5.78236
TXNDC16	243.232	229.189	257.557	231.781	206.008	399.293	373.546	434.007	1.88511e-06	0.787009	1.91105e-07	10.3387	1.72549	5.72466
EEF1B2P3	1009.59	1067.98	1099.38	1029.43	1033.6	674.814	745.723	756.636	1.53904e-06	-0.531184	1.45688e-07	-10.5922	0.691987	5.81275
RSPRY1	1184.31	1223.3	1126.01	1118.58	1136.78	817.259	857.275	820.627	1.50774e-06	-0.47659	1.41476e-07	-10.6199	0.718674	5.82167
ERRFI1	1848.54	1940.79	1828.64	2006.8	1854.6	2660.6	3241.43	3283.44	1.40192e-06	0.685831	1.28176e-07	10.7136	1.60863	5.85328
SPG21	885.912	757.324	828.971	852.018	872.918	1222.87	1211.43	1329.57	1.49027e-06	0.580548	1.39342e-07	10.6343	1.49542	5.82673
ZNF609	1324.29	1351.91	1272.08	1349.06	1302.86	970.507	1011.23	978.957	1.488e-06	-0.419174	1.39006e-07	-10.6366	0.747853	5.8274
GRWD1	1187.33	1196.8	1206.97	1173.43	1161.14	861.329	870.275	920.23	1.52782e-06	-0.423481	1.44246e-07	-10.6016	0.745623	5.81593
PPP1R3C	166.626	178.201	165.754	204.088	194.039	326.83	432.408	451.991	2.01844e-06	1.14426	2.09306e-07	10.2548	2.21033	5.69498
TCEAL8	883.912	911.721	906.922	858.717	855.439	1257.18	1217.07	1160.58	1.51232e-06	0.455964	1.42031e-07	10.6162	1.3717	5.82036
ALDOC	375.083	326.428	403.596	344.131	321.079	702.148	583.139	617.367	1.76185e-06	0.842102	1.7452e-07	10.4229	1.79266	5.75403
PRKAB2	480.258	463.237	498.379	495.341	482.472	292.955	340.162	308.197	1.89657e-06	-0.627036	1.92424e-07	-10.3323	0.647505	5.72203
RNF11	1782.07	1792.68	1758.6	1793.17	1845.5	2294.31	2401.73	2306.91	1.43392e-06	0.379423	1.32766e-07	10.6802	1.30082	5.84347
KLHL18	938.018	965.538	924.711	984.686	889.26	663.058	661.578	682.211	1.61328e-06	-0.490648	1.56059e-07	-10.5275	0.711706	5.79229
PEBP1	2646.55	2745.06	2824.43	2590.5	2709.67	3590.87	3643.06	3924.75	1.44643e-06	0.460086	1.34404e-07	10.6685	1.37562	5.8397
XPO6	3514.07	3663.11	3495.51	3661.78	3756.44	2787.16	2613.5	2701.19	1.44476e-06	-0.421998	1.34129e-07	-10.6705	0.74639	5.8402
UBQLN1	4233.47	4455.75	4403.42	4173.24	4168.06	3111.43	3294.73	3206.58	1.45427e-06	-0.419791	1.35373e-07	-10.6617	0.747533	5.83736
TTC19	533.391	516.733	549.693	509.077	522.847	730.593	712.353	737.917	1.6877e-06	0.466162	1.64782e-07	10.4765	1.38143	5.77271
PJA1	926.791	903.266	901.018	937.804	871.983	620.669	540.376	641.833	1.66948e-06	-0.598751	1.62188e-07	-10.4914	0.660325	5.77742
L1CAM	1063.75	1079.07	1120.09	1107.31	1083.4	836.599	775.937	791.807	1.59335e-06	-0.445227	1.5215e-07	-10.5513	0.734469	5.79769
ADAMTS2	702.038	684.702	759.876	739.246	770.371	1045.41	1008.51	1073	1.59187e-06	0.512186	1.51877e-07	10.553	1.42621	5.79809
TAF3	723.441	712.657	694.763	714.409	714.71	512.111	511.778	456.109	1.76019e-06	-0.532239	1.7421e-07	-10.4246	0.691481	5.75444
PODN	218.712	172.094	229.922	205.777	208.673	382.284	349.871	373.75	2.06177e-06	0.839312	2.16021e-07	10.2258	1.7892	5.68576
MFSD6	757.174	697.833	736.207	711.682	755.932	494	491.703	531.058	1.753e-06	-0.533366	1.73352e-07	-10.4292	0.690941	5.75622
HPCAL1	689.744	654.66	627.633	794.108	745.622	1168.98	1106.83	1119.25	1.59612e-06	0.692963	1.53395e-07	10.5437	1.6166	5.79693
KCTD6	303.532	292.996	306.896	267.194	251.541	141.564	159.291	145.201	2.32392e-06	-0.933342	2.54082e-07	-10.0778	0.523644	5.63378
SPATA20	1123	1171.51	1094.43	1062.24	1130.76	1727.69	1517.5	1568.95	1.5255e-06	0.522547	1.43901e-07	10.6039	1.43649	5.81659
RILPL2	351.537	357.863	373.027	373.946	374.839	570.422	559.364	507.989	1.85884e-06	0.574903	1.87363e-07	10.357	1.48958	5.73076
CHRM4	118.62	128.914	144.05	125.966	126.796	61.4009	50.8793	64.8996	2.88728e-06	-1.13115	3.35063e-07	-9.82947	0.456552	5.53951
FAM20C	895.174	804.486	750.966	1088.27	958.6	1701.94	1693.58	1730.05	1.54823e-06	0.937487	1.472e-07	10.5825	1.91519	5.81017
LTO1	446.502	460.966	445.101	449.62	475.046	309.162	311.442	278.55	2.0088e-06	-0.604647	2.0764e-07	-10.2621	0.657632	5.69706
TIAM2	275.877	267.509	243.755	248.496	230.367	122.504	142.538	140.342	2.4301e-06	-0.908	2.6831e-07	-10.0285	0.532923	5.61438
CPOX	517.047	443.232	470.726	481.314	489.235	698.979	737.64	812.219	1.76194e-06	0.640421	1.74821e-07	10.4213	1.55878	5.75401
TMEM9	1090.32	1085.08	1119.1	1129.79	1217.65	1550.39	1661.48	1792.11	1.54371e-06	0.562141	1.4646e-07	10.5872	1.47646	5.81143
STMN3	134.911	140.465	124.319	180.239	130.481	286.82	280.188	270.223	2.3106e-06	0.986659	2.51094e-07	10.0885	1.98159	5.63628
GSKIP	859.398	833.964	916.793	848.316	844.241	582.437	622.799	613.847	1.74359e-06	-0.505582	1.7199e-07	-10.4365	0.704376	5.75856
PSMB7	3829.82	3763.92	3622.8	3826.19	3828.54	2932.92	2877.33	2902.79	1.52546e-06	-0.377783	1.4377e-07	-10.6047	0.769619	5.8166
PSMD8	4849.62	5148.57	5133.71	4692.79	4959.33	3708.02	3288.62	3487.31	1.53904e-06	-0.505074	1.45636e-07	-10.5926	0.704624	5.81275
PKM	27147	27373.8	27705.4	27303.2	26722.8	37863.8	36471.1	38079.5	1.83361e-06	0.459356	1.83604e-07	10.3758	1.37493	5.73669
PRKAR2B	439.401	357.711	348.334	416.326	362.604	672.762	633.792	628.048	1.85919e-06	0.751446	1.87553e-07	10.356	1.68348	5.73068
UTP4	1369.24	1386.47	1422.1	1362.07	1422.54	1058.67	1009.26	1070.83	1.59612e-06	-0.412186	1.53473e-07	-10.5432	0.751484	5.79693
BACE1	620.255	628.028	548.684	599.093	637.234	874.304	868.083	900.803	1.72173e-06	0.540488	1.69262e-07	10.4515	1.45446	5.76403
C18orf25	951.295	899.023	918.791	870.232	967.672	636.546	668.234	634.161	1.73694e-06	-0.511266	1.71189e-07	-10.4409	0.701607	5.76022
FAM184A	190.078	193.159	177.623	186.928	217.656	101.797	100.817	104.912	2.65419e-06	-0.910803	3.00752e-07	-9.92585	0.531889	5.57607
EVA1A	340.194	361.187	336.564	359.885	328.912	182.369	215.907	214.928	2.25495e-06	-0.75908	2.43364e-07	-10.1169	0.590873	5.64686
EPHX1	725.549	760.633	836.853	744.358	746.16	1154.15	1067.08	1091.8	1.66679e-06	0.53517	1.61788e-07	10.4937	1.44911	5.77812
MLPH	380.147	352.6	354.265	388.635	358.375	553.586	527.122	602.539	1.91819e-06	0.611907	1.9589e-07	10.3158	1.52828	5.71711
CD59	2635.32	2522.33	2741.52	2595.65	2618.42	3431.06	3689.75	3892.72	1.54823e-06	0.483805	1.47082e-07	10.5833	1.39843	5.81017
SUN1	1724.86	1762.44	1807.95	1750.69	1718.11	2277.05	2229.12	2288.82	1.54371e-06	0.37014	1.46514e-07	10.5869	1.29248	5.81143
MICAL2	2097.82	1965.96	1907.61	2206.21	2036.3	2883.77	2844.95	2909.36	1.54371e-06	0.497196	1.46377e-07	10.5878	1.41147	5.81143
COMMD1	522.167	509.756	499.348	507.307	532.286	336.561	369.712	343.424	2.00699e-06	-0.555675	2.07287e-07	-10.2637	0.680339	5.69746
UTP15	574.251	566.882	595.101	574.176	564.226	419.95	391.672	403.742	1.94033e-06	-0.505424	1.98955e-07	-10.3015	0.704453	5.71212
PIGK	1031.06	959.908	1042.12	905.363	899.18	1430.11	1394.4	1466.19	1.60986e-06	0.566328	1.55595e-07	10.5303	1.48075	5.79321
WDR43	1508.18	1498.77	1497.11	1421.9	1428.58	1130.36	1070.14	1084.68	1.60986e-06	-0.425669	1.55471e-07	-10.531	0.744494	5.79321
CCND1	4132.27	3932.14	3867.55	4554.54	4136.43	5892.15	6051.7	6182.12	1.59612e-06	0.552978	1.52827e-07	10.5472	1.46711	5.79693
ADAM17	716.308	703.898	697.711	807.961	726.642	1032.43	1051.03	1096.24	1.6898e-06	0.538267	1.65422e-07	10.4729	1.45223	5.77217
FSTL3	1804.59	2042.75	2217.51	1760.88	1959.7	1132.27	1160.22	1227.86	1.60314e-06	-0.733659	1.54281e-07	-10.5383	0.601377	5.79503
SNX21	220.762	264.737	256.573	259.629	240.573	418.92	393.708	388.028	2.12786e-06	0.690078	2.24885e-07	10.1889	1.61337	5.67206
SERTAD4	202.291	194.252	201.343	146.154	186.719	78.8592	76.994	72.988	2.86749e-06	-1.28187	3.32291e-07	-9.83686	0.411262	5.5425
DHX37	1164.89	1287.28	1232.61	1298.93	1264.26	825.933	889.779	903.589	1.69499e-06	-0.51727	1.66107e-07	-10.469	0.698693	5.77083
B4GALNT4	835.91	833.033	870.395	779.761	874.295	1146.46	1210.1	1155.39	1.6897e-06	0.481857	1.65273e-07	10.4737	1.39654	5.77219
PSAP	14877.9	14485.3	14918.5	15969.5	16045.8	21225.6	22809.2	24019.7	1.82088e-06	0.571502	1.82179e-07	10.383	1.48607	5.73972
UCK2	766.345	780.079	776.688	770.791	766.406	516.411	582.012	506.035	1.86968e-06	-0.532439	1.89231e-07	-10.3478	0.691385	5.72823
INSIG1	1389.76	1271.97	1452.64	974.317	1052.83	2666.13	2540.41	2776.32	1.60986e-06	1.13224	1.55564e-07	10.5305	2.19199	5.79321
PUS3	201.307	205.313	195.396	199.122	196.02	125.634	112.163	106.13	2.71782e-06	-0.802808	3.1044e-07	-9.89749	0.573232	5.56578
SDE2	996.26	915.35	904.965	946.46	962.406	691.652	629.037	659.238	1.81274e-06	-0.518211	1.80875e-07	-10.3897	0.698237	5.74166
PCDH10	204.413	219.769	229.928	228.439	232.046	134.701	127.823	122.719	2.65247e-06	-0.793006	2.99987e-07	-9.92814	0.57714	5.57635
KLHL23	260.563	230.216	247.704	226.736	241.596	139.073	143.192	142.75	2.5891e-06	-0.766721	2.91205e-07	-9.95478	0.587752	5.58685
CLIP2	2444.24	2448.21	2366.51	2593.17	2422.37	3235.95	3246.3	3245.77	1.60541e-06	0.402094	1.54633e-07	10.5361	1.32142	5.79441
SLC22A23	113.449	103.284	104.59	104.576	96.8972	50.182	55.904	44.7467	3.20134e-06	-1.06089	3.82654e-07	-9.712	0.479338	5.49467
SCARB1	1018.78	947.037	969.092	901.97	904.423	1421.8	1288.85	1413.14	1.6877e-06	0.535932	1.64937e-07	10.4757	1.44988	5.77271
SELENOK	939.098	958.258	997.717	902.849	950.922	634.654	660.372	703.152	1.83607e-06	-0.512473	1.84155e-07	-10.373	0.70102	5.73611
TTC30A	161.473	139.465	135.171	160.028	142.478	276.717	242.45	256.5	2.50282e-06	0.808858	2.78828e-07	9.99382	1.75182	5.60157
HCG11	241.171	227.561	255.593	305.82	238.061	442.412	431.537	473.032	2.18346e-06	0.830839	2.33115e-07	10.1561	1.77872	5.66085
MAP3K12	246.294	271.641	243.735	300.461	307.049	538.777	522.492	451.651	2.13596e-06	0.883423	2.25919e-07	10.1847	1.84475	5.67041
SLC25A23	1479.65	1460.28	1442.78	1311.41	1350.66	2244.11	1968.72	2036.86	1.66022e-06	0.563377	1.61013e-07	10.4982	1.47772	5.77983
AVPI1	586.524	566.775	596.075	598.351	581.345	808.604	923.731	984.718	1.85884e-06	0.624311	1.8729e-07	10.3573	1.54147	5.73076
CNRIP1	701.982	689.355	648.372	664.979	670.789	913.662	920.3	902.379	1.83598e-06	0.434844	1.83993e-07	10.3738	1.35176	5.73613
IFRD2	1052.48	1086.23	1118.14	1038.2	1098.29	743.762	786.921	808.508	1.81274e-06	-0.469444	1.80913e-07	-10.3895	0.722243	5.74166
PIGX	317.773	287.235	306.92	288.286	319.141	454.214	451.012	446.784	2.1633e-06	0.57087	2.30424e-07	10.1667	1.48542	5.66488
FRMD8	683.625	664.972	637.499	747.203	767.955	1047.37	1140.36	1059.32	1.81274e-06	0.630639	1.8087e-07	10.3897	1.54825	5.74166
DDIT3	437.242	423.276	442.178	550.086	506.627	226.057	238.142	246.535	2.32105e-06	-0.987633	2.53577e-07	-10.0796	0.504304	5.63431
CNPY3	878.788	880.724	942.463	916.897	904.621	1208	1208.17	1308.32	1.76194e-06	0.455666	1.74771e-07	10.4216	1.37142	5.75401
COBLL1	307.591	296.611	323.693	258.629	264.61	158.212	143.513	133.303	2.66113e-06	-1.0027	3.01759e-07	-9.92286	0.499064	5.57493
IRS2	816.472	856.531	810.207	916.049	920.135	577.55	584.598	549.778	1.93596e-06	-0.59585	1.98186e-07	-10.305	0.661655	5.7131
SLC35F5	1519.48	1528.62	1424.04	1515.15	1473.84	1920.72	1989.69	1981.62	1.68755e-06	0.396549	1.64503e-07	10.4781	1.31636	5.77274
TRIB3	1128.06	1188.27	1193.16	1318.34	1343.84	816.291	708.963	680.69	1.84509e-06	-0.74821	1.85365e-07	-10.3669	0.595342	5.73398
CLSTN1	3175.84	2967.62	2954.69	3312.83	3212.86	4336.48	4268.79	4483.53	1.69499e-06	0.482739	1.66334e-07	10.4678	1.39739	5.77083
APOLD1	144.101	148.264	143.081	159.279	134.794	252.491	229.522	254.12	2.61695e-06	0.747002	2.94797e-07	9.94378	1.6783	5.5822
FTH1	10536.1	10278.8	9727.58	11719.2	9436.86	17450.4	16005.4	16568.6	1.87239e-06	0.692697	1.8966e-07	10.3457	1.6163	5.7276
GOLIM4	1176.12	1178.45	1132.92	1268.58	1262.53	1664.71	1653.28	1644.81	1.7327e-06	0.460021	1.70627e-07	10.444	1.37556	5.76128
CUL4B	2090.72	2100.36	2207.61	2074.28	2067.03	1535.72	1631.41	1608.07	1.70855e-06	-0.405453	1.67825e-07	-10.4594	0.754999	5.76737
SLFN12	500.688	503.883	496.403	473.619	470.383	292.939	337.484	326.256	2.24022e-06	-0.617842	2.41031e-07	-10.1257	0.651645	5.64971
NAT14	384.247	351.652	382.883	458.858	413.47	629.555	695.589	727.688	2.04982e-06	0.782621	2.14392e-07	10.2327	1.72025	5.68828
EIF3M	3013.39	3040.09	3206.35	2826	3008.08	2229.05	2191.1	2242.38	1.69499e-06	-0.441716	1.66352e-07	-10.4677	0.736258	5.77083
USP12	1256.84	1243.2	1277.02	1267.7	1235.82	981.419	950.579	916.742	1.81747e-06	-0.404764	1.81536e-07	-10.3863	0.75536	5.74053
CYB5R2	501.699	490.967	528.985	456.307	480.791	328.945	312.351	301.034	2.25495e-06	-0.644048	2.43334e-07	-10.117	0.639915	5.64686
PCMTD2	479.251	474.385	421.372	533.414	512.533	755.88	756.99	807.497	1.99919e-06	0.679621	2.06316e-07	10.268	1.60172	5.69915
ITCH	1815.81	1778.77	1850.38	1776.63	1817.88	1314.31	1410.15	1393.63	1.75232e-06	-0.397308	1.73141e-07	-10.4303	0.759274	5.75639
RCN3	442.476	438.949	413.478	483.964	428.927	839.458	695.305	689.899	2.0373e-06	0.744243	2.11937e-07	10.2433	1.67509	5.69095
SNHG15	354.534	377.356	359.248	345.687	372.71	212.379	241.499	195.104	2.51118e-06	-0.747665	2.80176e-07	-9.98948	0.595567	5.60012
HMG20B	991.198	1033.42	913.822	893.307	895.819	1639.13	1369.62	1502.12	1.81268e-06	0.668233	1.80456e-07	10.3918	1.58913	5.74168
LRRC59	6950.5	7081.88	7079.83	6666.96	6871.89	5231.35	5326.69	5333.02	1.80684e-06	-0.387322	1.79426e-07	-10.3971	0.764547	5.74308
MAMLD1	310.687	371.693	334.53	341.825	349.826	195.398	212.972	194.537	2.57384e-06	-0.765449	2.88874e-07	-9.96199	0.58827	5.58942
ATP2A3	536.507	562.237	496.363	613.752	559.587	837.341	836.522	835.874	1.98906e-06	0.599613	2.04941e-07	10.2741	1.51531	5.70135
PTBP3	1672.75	1663.22	1612.54	1551.47	1605.44	1178.42	1175.15	1252.96	1.80764e-06	-0.431133	1.79655e-07	-10.396	0.741679	5.74289
MMP2	4789.36	4793.74	4285.95	6099.91	5306.63	9956.29	9392.52	9625.49	1.84621e-06	0.943946	1.85631e-07	10.3656	1.92378	5.73372
TNRC18	1011.62	1107.75	1028.32	1156.01	1059.45	1536.72	1541.88	1464.45	1.82014e-06	0.498393	1.81954e-07	10.3841	1.41264	5.73989
PEMT	149.22	166.403	171.709	158.304	157.212	269.542	246.58	266.419	2.68513e-06	0.69942	3.04926e-07	9.91351	1.62385	5.57103
CCDC9	443.468	487.598	471.738	491.129	496.412	315.393	326.425	309.623	2.33149e-06	-0.590735	2.55103e-07	-10.0742	0.664005	5.63237
ID3	874.729	939.277	720.375	1103.09	914.763	1791.92	1770.76	1715.49	1.83774e-06	0.9637	1.84475e-07	10.3714	1.95031	5.73572
ESYT2	1256.89	1311.1	1287.85	1340.17	1269.06	1667.25	1737.34	1833.03	1.80859e-06	0.433	1.79899e-07	10.3947	1.35004	5.74266
ASRGL1	156.353	171.718	179.624	139.232	160.79	83.968	66.3607	67.5805	3.33703e-06	-1.15432	4.02469e-07	-9.66764	0.449276	5.47664
PER3	198.237	150.672	173.673	150.365	162.296	297.416	290.414	321.437	2.65247e-06	0.86679	2.99744e-07	9.92886	1.8236	5.57635
USP38	970.742	1034.44	1045.11	1061.64	1071.64	760.301	726.105	754.512	1.96796e-06	-0.471732	2.02114e-07	-10.2869	0.721098	5.70598
ADAM19	1234.38	1224.98	1301.69	1276.28	1246.93	926.114	972.916	929.184	1.89917e-06	-0.41517	1.92846e-07	-10.3303	0.749931	5.72144
THEM6	105.302	109.253	113.465	106.184	104.571	177.867	177.384	201.867	3.02493e-06	0.784552	3.54797e-07	9.77872	1.72256	5.51928
TRIM2	421.053	403.344	396.685	415.257	373.628	583.53	562.533	596.825	2.20297e-06	0.531811	2.36111e-07	10.1445	1.44574	5.65699
RUSC2	1076.99	1113.06	1045.11	1199.51	1072.5	773.212	771.107	763.53	1.97512e-06	-0.516208	2.03013e-07	-10.2828	0.699207	5.70441
DICER1	1573.61	1500.23	1513.86	1578.52	1606.51	1194.46	1173.49	1138.77	1.86084e-06	-0.410968	1.87873e-07	-10.3545	0.752119	5.73029
B3GNT7	346.439	347.438	360.194	307.069	330.825	214.774	191.052	184.868	2.69709e-06	-0.779796	3.06731e-07	-9.90823	0.582449	5.5691
GLT8D2	307.59	306.994	317.764	310.733	301.699	466.623	426.33	476.892	2.36134e-06	0.562433	2.59148e-07	10.0599	1.47676	5.62684
TPCN1	515.005	467.438	416.434	546.402	484.913	768.724	812.671	819.409	2.11553e-06	0.72489	2.22705e-07	10.1978	1.65277	5.67458
CDC42SE1	1302.86	1344.81	1330.29	1335.02	1306.98	983.864	1043.95	995.395	1.91717e-06	-0.393825	1.95626e-07	-10.317	0.761109	5.71734
SUPV3L1	982.975	1036.34	976.032	947.345	938.309	705.311	715.783	692.335	2.03793e-06	-0.469417	2.12385e-07	-10.2413	0.722256	5.69081
G3BP2	3370	3235.06	3350.43	3445.24	3276.4	4268.83	4418.27	4336.14	1.84897e-06	0.380406	1.86061e-07	10.3634	1.30171	5.73307
RAP1GAP	359.735	348.192	359.196	366	352.272	232.609	214.13	246.136	2.63005e-06	-0.629431	2.96709e-07	-9.93798	0.646431	5.58004
DNAJA3	1370.26	1446.89	1513.88	1376.78	1366.54	998.426	952.346	1046.15	1.93596e-06	-0.502342	1.98048e-07	-10.3057	0.70596	5.7131
TMEM94	966.664	1091.39	908.894	1018.22	941.534	1539.06	1530.85	1402.18	1.9117e-06	0.598803	1.9491e-07	10.3204	1.51446	5.71858
COL1A2	7755.76	7190.08	7280.12	9132.68	8385.93	12966.8	13485.6	14514.9	2.01529e-06	0.785106	2.08777e-07	10.2571	1.72322	5.69566
SMIM19	112.444	142.305	115.44	126.251	110.642	215.076	214.545	224.692	3.00393e-06	0.851208	3.51588e-07	9.78676	1.80401	5.52231
GPR4	169.594	165.798	148.033	169.046	146.2	83.3882	57.1255	70.1703	3.5196e-06	-1.20455	4.28566e-07	-9.61265	0.433905	5.45351
ELF4	907.38	930.92	876.343	979.431	952.951	632.867	680.691	647.251	2.10365e-06	-0.507864	2.21106e-07	-10.2044	0.703263	5.67703
CLCN7	1670.69	1647.72	1514.84	1663.28	1675.19	2280.97	2208.36	2162.07	1.86968e-06	0.440632	1.89098e-07	10.3484	1.3572	5.72823
KCNQ5	264.649	245.811	223.02	235.428	253.687	123.929	128.53	148.186	3.06938e-06	-0.877037	3.62555e-07	-9.75959	0.544485	5.51295
FAM160A1	187.021	154.96	166.76	172.11	173.507	93.1162	79.4716	92.756	3.3911e-06	-0.951534	4.10676e-07	-9.64994	0.517082	5.46966
PKP1	279.91	276.482	236.865	291.437	298.99	154.525	118.147	120.667	3.06353e-06	-1.08495	3.6161e-07	-9.7619	0.471407	5.51378
RALBP1	1385.59	1316.49	1290.83	1388.04	1293.37	1789	1755.96	1896.45	1.89981e-06	0.442177	1.93225e-07	10.3285	1.35865	5.72129
TUBB4B	9824.91	10379.1	10804.3	9668.84	9734.65	7282.32	7232.31	7375.24	1.99784e-06	-0.46517	2.06011e-07	-10.2694	0.724386	5.69944
CHMP1B	1075.99	1063.69	1013.51	1070.18	1046.53	1390.39	1422.71	1350.84	1.95191e-06	0.39671	2.00303e-07	10.2952	1.3165	5.70954
NELFE	1556.26	1658.99	1600.71	1515.15	1604.67	1206.47	1187.85	1173.95	1.93889e-06	-0.415238	1.98646e-07	-10.3029	0.749896	5.71245
RNF13	597.785	567.5	587.178	609.492	630.325	848.386	802.348	861.56	2.13674e-06	0.484973	2.26179e-07	10.1837	1.39956	5.67025
EMILIN3	97.1365	105.789	132.235	121.927	115.869	51.5436	48.4465	48.2845	3.78249e-06	-1.19972	4.72184e-07	-9.5283	0.435361	5.42222
HBP1	698.952	707.296	698.693	737.645	665.421	944.636	950.705	1007.45	2.0811e-06	0.464099	2.18391e-07	10.2158	1.37946	5.68171
TPP1	1840.32	1702.83	1532.59	2089.43	1754.21	3318.52	2935.57	3165.85	1.89942e-06	0.821547	1.93028e-07	10.3294	1.7673	5.72138
SIAE	385.28	389.632	365.109	451.828	409.079	700.477	601.533	661.403	2.29462e-06	0.710483	2.48977e-07	10.0962	1.63635	5.63929
ENSG00000216775	135.924	141.386	149.013	128.823	141.798	230.934	262.928	225.05	2.996e-06	0.777509	3.49914e-07	9.79099	1.71417	5.52346
PFKL	2402.37	2542.13	2474.07	2661.44	2620.95	3491.04	3337.55	3481.28	1.90149e-06	0.43685	1.93554e-07	10.3269	1.35365	5.72091
DACT3	114.518	114.273	126.282	149.54	132.063	299.063	227.51	271.57	3.00248e-06	1.05977	3.5092e-07	9.78845	2.08461	5.52252
C2CD2L	580.411	590.038	583.238	598.294	596.794	434.051	372.174	367.289	2.40108e-06	-0.596643	2.6431e-07	-10.0421	0.661291	5.61959
PGBD5	168.633	159.359	153.929	160.851	179.635	84.5191	88.8624	94.6635	3.47803e-06	-0.879039	4.22646e-07	-9.6248	0.543729	5.45867
PLAGL2	1035.14	1110.22	1038.18	1209.65	1144.58	763.578	699.975	716.869	2.11711e-06	-0.606269	2.23048e-07	-10.1964	0.656893	5.67426
REPS1	886.956	885.946	887.196	914.35	901.226	667.229	679.952	680.215	2.15794e-06	-0.404702	2.29675e-07	-10.1697	0.755392	5.66596
TTC3P1	173.725	147.26	137.144	186.143	164.957	286.081	323.7	359.256	2.86369e-06	0.999036	3.31376e-07	9.83931	1.99866	5.54307
RHOBTB2	672.37	614.091	653.302	637.163	582.842	870.37	961.18	948.486	2.14668e-06	0.553021	2.27764e-07	10.1773	1.46715	5.66823
CBL	1794.31	1727.23	1714.21	1968.4	1855.16	1240.89	1241.42	1313.79	1.98682e-06	-0.516655	2.04545e-07	-10.2759	0.698991	5.70184
RRP15	917.567	912.09	921.763	781.861	929.019	525.481	585.626	566.404	2.25082e-06	-0.67254	2.42546e-07	-10.12	0.627401	5.64766
KSR1	399.554	402.766	379.928	452.874	406.657	652.91	655.428	586.146	2.36134e-06	0.629081	2.59153e-07	10.0599	1.54658	5.62684
OCRL	1451.02	1496.72	1436.88	1602.73	1497.14	1069.02	1096.73	1115.26	2.03388e-06	-0.451941	2.11143e-07	-10.2467	0.731058	5.69167
SV2A	922.76	883.927	876.311	1051.86	991.308	1514.05	1395.12	1411	2.03793e-06	0.609815	2.12299e-07	10.2417	1.52606	5.69081
HMMR	849.139	821.251	853.646	749.679	707.528	1202	1186.86	1260.29	2.09279e-06	0.615231	2.19792e-07	10.2099	1.5318	5.67927
HK1	3143.16	3064.2	3189.57	3109.18	3097.48	4054.87	3909.18	4135.46	1.97978e-06	0.369708	2.03656e-07	10.2799	1.29209	5.70338
PCYOX1L	358.691	363.026	357.23	307.925	327.369	514.854	517.323	541.714	2.49982e-06	0.617758	2.78024e-07	9.99642	1.53449	5.60209
ARHGEF2	2353.28	2521.73	2255.98	2561.28	2432.84	1754.96	1778.28	1679.67	2.01529e-06	-0.479578	2.08506e-07	-10.2583	0.717187	5.69566
ELOVL2	379.006	306.456	367.166	307.583	321.913	161.369	171.107	185.07	3.08598e-06	-0.961179	3.65283e-07	-9.75297	0.513637	5.51061
TRIOBP	1832.15	1854.79	1829.66	1929.15	2025.32	2514.8	2534.4	2606.1	2.03612e-06	0.431073	2.11645e-07	10.2445	1.34824	5.6912
DHX58	236.025	238.216	190.449	269.561	235.719	434.111	434.198	397.788	2.7927e-06	0.858829	3.21077e-07	9.86742	1.81357	5.55398
RYBP	2099.86	2015.19	2294.49	2117.01	2039.78	1532.54	1513.68	1549.3	2.05504e-06	-0.46292	2.15146e-07	-10.2295	0.725516	5.68718
GABPA	653.971	660.833	706.609	707.497	640.632	951.761	913.023	936.146	2.25915e-06	0.471471	2.44004e-07	10.1145	1.38652	5.64606
GBA2	1294.65	1383.05	1377.69	1323.97	1321.84	996.369	1030.48	1010.86	2.15428e-06	-0.403997	2.29099e-07	-10.172	0.755761	5.6667
EP300	2921.41	3048.82	2682.31	3061.71	2957.41	2172.64	2045.98	2057.99	2.0477e-06	-0.486903	2.13833e-07	-10.2351	0.713555	5.68873
CTNNB1	6638.84	6339.85	6469.93	6593.37	6579.47	8370.81	9137.63	9464.62	2.17349e-06	0.460973	2.3187e-07	10.161	1.37647	5.66284
LEPROTL1	897.196	945.397	957.259	969.686	976.849	711.462	671.758	642.081	2.31363e-06	-0.491748	2.51999e-07	-10.0853	0.711163	5.63571
ENSG00000227081	6206.61	5871.38	6496.59	5780.26	5654.91	4392.3	4026.07	3931.81	2.1068e-06	-0.543768	2.21612e-07	-10.2023	0.685977	5.67638
SLC4A8	180.854	167.319	165.788	156.599	165.915	258.081	273.697	301.628	3.12286e-06	0.729224	3.70943e-07	9.73939	1.65775	5.50545
AHI1	690.79	692.538	716.454	716.764	655.023	1016.2	936.541	944.563	2.27298e-06	0.47556	2.45926e-07	10.1074	1.39046	5.6434
SPTY2D1	947.231	955.917	942.468	950.757	872.793	655.741	668.684	694.616	2.31995e-06	-0.472563	2.53152e-07	-10.0811	0.720683	5.63452
LRWD1	910.456	990.463	998.726	973.287	984.743	726	665.356	686.179	2.31225e-06	-0.487981	2.51487e-07	-10.0871	0.713022	5.63596
KCNG1	459.815	483.238	441.133	443.336	428.231	293.784	293.178	309.57	2.8131e-06	-0.593264	3.23889e-07	-9.85965	0.662842	5.55081
TWNK	558.901	547.165	552.671	591.72	579.073	377.062	407.889	355.231	2.65247e-06	-0.57544	3.00118e-07	-9.92774	0.671082	5.57635
DOHH	657.028	712.765	719.449	672.862	719.991	469.174	482.122	500.828	2.51516e-06	-0.524122	2.81037e-07	-9.98672	0.695382	5.59944
FOXN2	831.75	850.777	813.193	742.007	806.73	559.253	569.802	536.419	2.4552e-06	-0.54228	2.72303e-07	-10.0152	0.686685	5.60991
SBSN	84.8525	75.5669	76.9432	101.204	120.499	201.002	201.862	204.96	3.61e-06	1.1677	4.44666e-07	9.58049	2.24653	5.44249
NCS1	1860.73	1732.31	1723.08	1825.29	1813.73	2293.77	2444.27	2463.21	2.12232e-06	0.4226	2.23948e-07	10.1928	1.34034	5.67319
CDC42BPA	1940.44	1973.14	1929.35	1933.56	1985.81	1563.7	1497.58	1515.03	2.14385e-06	-0.356282	2.27287e-07	-10.1792	0.781175	5.66881
SRPX	752.059	727.246	686.854	834.863	764.563	1089.92	1103.46	1186.64	2.29462e-06	0.5831	2.48912e-07	10.0964	1.49807	5.63929
ATP6AP1	2476.94	2555.19	2316.17	2579.26	2627.09	3588.05	3347.86	3517.15	2.14099e-06	0.473471	2.26806e-07	10.1812	1.38845	5.66938
NOL6	1429.52	1492.68	1440.85	1538.01	1525.83	1037.14	1144.8	1054.59	2.22971e-06	-0.461865	2.39532e-07	-10.1314	0.726047	5.65175
ENDOD1	618.217	568.353	612.841	572.177	582.917	805.239	798.989	832.583	2.43795e-06	0.459286	2.69582e-07	10.0242	1.37486	5.61297
PRRX1	611.063	487.982	463.796	636.392	520.889	1039.57	1019.33	934.508	2.41027e-06	0.8841	2.65665e-07	10.0374	1.84561	5.61793
ZFHX3	934.968	880.777	830.938	960.326	902.104	604.863	634.973	615.35	2.4538e-06	-0.542411	2.71537e-07	-10.0177	0.686623	5.61016
SDCBP	4454.13	3965.79	4015.58	4227.99	4033.2	5520.67	5866.79	5939.39	2.19871e-06	0.48117	2.3529e-07	10.1476	1.39588	5.65783
TPRG1L	1072.93	1049.83	1114.18	1161.16	1095.57	1450.52	1508.61	1454.04	2.22092e-06	0.42151	2.38218e-07	10.1364	1.33933	5.65347
KIF3C	907.379	799.592	824.03	867.556	819.441	1167.35	1149.53	1222.7	2.29462e-06	0.484639	2.48901e-07	10.0965	1.39924	5.63929
CAMKK2	834.842	844.55	834.89	765.263	842.727	1097.83	1119.17	1136.81	2.31225e-06	0.440615	2.51657e-07	10.0865	1.35718	5.63596
COL15A1	438.392	342.952	331.548	467.464	379.781	837.98	709.221	751.438	2.5891e-06	0.976284	2.91231e-07	9.9547	1.96739	5.58685
DCAF13	1258.9	1324.3	1339.2	1206.94	1281.37	893.156	920.682	961.004	2.30984e-06	-0.470901	2.5082e-07	-10.0895	0.721514	5.63642
ERMAP	163.487	142.213	137.158	161.056	154.752	243.153	266.075	250.007	3.38571e-06	0.742964	4.09743e-07	9.65193	1.67361	5.47035
SHANK3	501.769	499.181	502.289	566.953	498.455	810.179	750.472	724.637	2.5413e-06	0.568522	2.8438e-07	9.97608	1.483	5.59494
POGLUT2	305.551	323.425	289.133	295.073	318.943	442.749	454.242	496.787	2.86657e-06	0.600756	3.31946e-07	9.83778	1.51651	5.54264
TRPV4	225.865	228.367	258.55	226.609	241.457	382.136	357.725	352.291	3.06353e-06	0.626038	3.61155e-07	9.76301	1.54332	5.51378
YTHDF2	3145.23	3037.31	3265.55	2959.22	3125.74	2350.44	2371.67	2348.05	2.18383e-06	-0.397729	2.33335e-07	-10.1552	0.759052	5.66078
MRPL37	2651.65	2661.43	2718.84	2435.54	2527.36	1961.68	1787.33	1874.25	2.18919e-06	-0.471276	2.34089e-07	-10.1523	0.721327	5.65972
LNPK	785.812	765.889	870.419	795.579	794.457	1141.49	1077.3	1130.02	2.35482e-06	0.476729	2.58047e-07	10.0638	1.39158	5.62804
LAMP2	3863.56	3545.47	3592.2	3705.67	3662.38	4864.21	4745.44	4928.83	2.23582e-06	0.400078	2.40373e-07	10.1282	1.31958	5.65056
OTUD7B	1159.78	1203.51	1110.23	1261.67	1187.64	857.474	862.009	839.954	2.38337e-06	-0.472124	2.61965e-07	-10.0501	0.720903	5.62281
SHISAL1	402.64	364.586	350.305	367.676	411.705	566.085	559.827	573.465	2.75551e-06	0.580761	3.15659e-07	9.8826	1.49564	5.5598
LOX	1418.36	1409.24	1466.46	1719.37	1488.23	2178.53	2387.24	2335.63	2.2227e-06	0.619491	2.38594e-07	10.1349	1.53633	5.65312
HSDL1	613.11	618.484	618.762	693.626	685.455	897.904	949.55	966.324	2.47854e-06	0.539298	2.75097e-07	10.006	1.45326	5.6058
AK4	478.259	363.571	517.104	422.172	401.18	791.876	762.834	851.705	2.63055e-06	0.888415	2.96984e-07	9.93715	1.85114	5.57995
TMEM38B	592.669	553.718	566.454	613.883	591.599	831.312	785.291	872.662	2.54113e-06	0.50763	2.8415e-07	9.97681	1.42171	5.59497
KRAS	1328.38	1347.55	1374.72	1344.69	1295.93	1047.83	1019.08	997.478	2.34181e-06	-0.389604	2.56426e-07	-10.0695	0.763339	5.63045
NDUFB10	1043.31	1054.96	1043.11	1005.96	972.406	1360.03	1345.64	1345.09	2.31995e-06	0.399369	2.53263e-07	10.0807	1.31893	5.63452
CPEB2	610.026	555.497	576.332	615.691	594.252	400.361	422.609	397.454	2.82718e-06	-0.536649	3.25744e-07	-9.85456	0.68937	5.54865
RBCK1	1394.79	1505.58	1419.13	1582.15	1413.85	2144.44	2081.3	1964.14	2.26114e-06	0.496646	2.44407e-07	10.113	1.41093	5.64567
OTUD3	484.334	489.251	512.204	476.29	486.842	335.434	356.19	334.224	2.98427e-06	-0.518501	3.47773e-07	-9.79643	0.698097	5.52516
RBMS1	1338.61	1322.42	1320.43	1414.8	1452.51	1023.34	983.235	997.902	2.39031e-06	-0.450809	2.62926e-07	-10.0468	0.731633	5.62155
GLB1	2270.55	2212.55	2301.37	2445.01	2442.12	3190.03	3071.14	3228.84	2.27298e-06	0.439136	2.46064e-07	10.1069	1.35579	5.6434
TET3	622.276	678.331	564.49	680.821	702.914	362.35	402.118	374.642	2.93263e-06	-0.771461	3.40733e-07	-9.81457	0.585824	5.53274
WBP4	803.182	800.439	771.719	742.698	788.434	579.781	552.27	569.107	2.71572e-06	-0.461195	3.09075e-07	-9.90143	0.726384	5.56611
TMEM245	1688.05	1582.18	1518.79	1602.7	1559.94	2101.37	2096.25	2101.18	2.31995e-06	0.401781	2.5307e-07	10.0814	1.32114	5.63452
SLMAP	1790.24	1757.32	1784.27	1661.51	1682.04	1314.49	1325.15	1311.14	2.36605e-06	-0.396946	2.59866e-07	-10.0574	0.759464	5.62598
ZNF800	659.055	620.346	635.556	656.471	642.517	480.795	458.41	448.629	2.86322e-06	-0.47477	3.31083e-07	-9.8401	0.719581	5.54315
LPIN1	1051.45	935.952	1009.57	983.593	951.058	1307.53	1376.79	1367.55	2.454e-06	0.454553	2.71763e-07	10.017	1.37036	5.61012
RABL2A	116.497	116.403	91.7511	114.21	112.554	199.047	211.448	188.775	3.97204e-06	0.864368	5.01114e-07	9.47684	1.82054	5.40099
KLF10	1336.53	1292.41	1287.88	1413.3	1318.44	1015.78	954.5	949.709	2.49982e-06	-0.449963	2.77762e-07	-9.99728	0.732062	5.60209
SLC39A10	553.868	577.824	546.705	597.302	541.524	756.277	786.247	789.04	2.71851e-06	0.465097	3.10744e-07	9.89661	1.38041	5.56567
BECN1	773.51	735.032	683.894	764.61	749.064	1011.66	1057.74	1010.83	2.58444e-06	0.471182	2.90278e-07	9.95764	1.38625	5.58763
RNF38	786.79	785.169	752.99	749.015	776.651	557.918	578.537	574.449	2.77303e-06	-0.43293	3.18126e-07	-9.87566	0.740756	5.55705
CAPNS1	3377.16	3594.84	3258.64	3652.15	3482.77	5068.06	4734.22	4664.16	2.41027e-06	0.473726	2.65721e-07	10.0373	1.38869	5.61793
GNL2	1889.37	1974.76	1923.42	1868.49	1776.59	1438.94	1371.87	1412.26	2.42004e-06	-0.42181	2.66999e-07	-10.0329	0.746487	5.61618
BCL3	377.09	492.704	410.525	458.033	469.572	773.001	719.081	709.216	2.84982e-06	0.739593	3.29061e-07	9.84555	1.66971	5.54518
DGLUCY	298.388	262.028	279.269	304.715	307.811	424.278	483.296	481.494	3.17201e-06	0.674375	3.78359e-07	9.72194	1.59591	5.49867
LURAP1L	182.918	136.815	123.317	216.593	187.417	392.711	414.255	384.068	3.53583e-06	1.25695	4.3172e-07	9.60625	2.38991	5.45151
XXYLT1	330.067	335.503	337.502	372.363	308.542	510.4	490.055	517.771	3.11237e-06	0.59152	3.69181e-07	9.7436	1.50683	5.50691
MSRB3	1054.49	940.41	973.069	962.935	995.999	672.292	707.806	724.151	2.71782e-06	-0.490351	3.10096e-07	-9.89848	0.711852	5.56578
DOLPP1	597.791	630.571	622.712	599.066	619.1	457.607	414.441	432.708	3.03622e-06	-0.498239	3.56625e-07	-9.77417	0.70797	5.51767
MTHFD2	1620.59	1759.41	1817.86	1877.64	1888.12	1173.84	1213.35	1288.44	2.50515e-06	-0.548068	2.79296e-07	-9.99231	0.683936	5.60117
MFN2	2092.68	2013.63	1999.41	2209.87	2173.33	2739.7	2928.32	2908.46	2.43563e-06	0.446982	2.69123e-07	10.0258	1.36319	5.61339
CCT8	6063.56	6440.86	6810.42	5700.57	5900.03	4189.1	4175.2	4351	2.49982e-06	-0.542133	2.78287e-07	-9.99557	0.686755	5.60209
UNC119	688.734	701.262	622.694	585.888	602.553	1128.5	961.366	998.495	2.71782e-06	0.68544	3.10254e-07	9.89802	1.60819	5.56578
M6PR	2189.78	2077.32	2127.7	1996.54	1986.39	2903.82	2690.32	2891.36	2.4552e-06	0.446666	2.72105e-07	10.0158	1.36289	5.60991
PTPRG	710.174	673.679	624.673	708.243	686.183	921.21	973.578	997.634	2.72375e-06	0.502956	3.11569e-07	9.89425	1.41711	5.56483
NAT9	670.322	704.022	740.169	693.597	752.639	496.333	487.94	507.268	2.98427e-06	-0.517038	3.48168e-07	-9.79542	0.698805	5.52516
ARHGEF28	938.013	887.802	896.091	868.511	839.335	622.934	633.827	655.828	2.84494e-06	-0.473788	3.28262e-07	-9.84771	0.720072	5.54593
MYBBP1A	1984.36	2181.28	1971.79	2160.65	2019.43	1432.7	1553.85	1475.54	2.51124e-06	-0.471836	2.80391e-07	-9.98879	0.721046	5.60011
TM4SF1	1399.94	1429.32	1265.14	1769.03	1623.59	2629.33	2810.2	2630.39	2.49982e-06	0.854098	2.78175e-07	9.99594	1.80763	5.60209
LINC02381	122.594	141.865	126.339	131.003	139.686	57.6148	74.3385	63.3325	4.95497e-06	-1.02234	6.60033e-07	-9.24124	0.492318	5.30496
SEPTIN8	1394.79	1391.59	1315.5	1367.21	1343.27	1800.38	1734.02	1744.37	2.5438e-06	0.369093	2.85081e-07	9.97387	1.29154	5.59452
PELI1	344.357	357.205	374.037	346.363	336.224	215.032	238.515	230.462	3.68538e-06	-0.62594	4.55785e-07	-9.559	0.647997	5.43352
SEZ6L2	693.846	732.344	610.847	753.243	669.716	1083.16	1016.27	1039.3	2.76018e-06	0.599811	3.16423e-07	9.88045	1.51552	5.55906
NET1	1168.02	1249.67	1183.23	1087.93	1082.22	825.396	740.437	751.041	2.77704e-06	-0.579412	3.18817e-07	-9.87372	0.669236	5.55642
TBC1D8B	356.632	293.888	318.74	346.225	315.381	486.361	504.412	536.774	3.27566e-06	0.645221	3.93438e-07	9.68756	1.56398	5.4847
CKAP4	4086.3	3928.66	3673.13	4654.98	4237.91	6489.68	6507.84	6225.72	2.62186e-06	0.64284	2.95567e-07	9.94144	1.5614	5.58139
GUF1	802.127	861.141	790.49	757.614	803.277	578.617	567.805	561.663	2.98427e-06	-0.494597	3.48267e-07	-9.79517	0.70976	5.52516
PPP1R13B	334.136	363.328	342.451	315.995	356.142	215.815	205.34	223.909	3.77812e-06	-0.668577	4.71012e-07	-9.53046	0.629127	5.42272
KIAA2013	1716.7	1668.27	1775.37	1668.31	1718.9	2241.02	2157.5	2210.53	2.5438e-06	0.366136	2.84943e-07	9.97431	1.2889	5.59452
RPAIN	519.102	558.184	547.715	525.528	548.662	389.709	386.29	372.328	3.27874e-06	-0.495942	3.94079e-07	-9.68613	0.709099	5.48429
AZIN2	199.261	174.951	191.445	163.41	161.414	288.638	313.822	293.829	3.83822e-06	0.748434	4.80732e-07	9.51275	1.67997	5.41587
IFNLR1	201.293	188.032	188.492	172.189	204.762	103.316	112.929	103.807	4.57634e-06	-0.836044	5.94423e-07	-9.33025	0.560178	5.33948
CITED2	1756.56	1885.7	1696.41	1953.25	1783.34	2520.75	2628.96	2464.43	2.55837e-06	0.484997	2.86926e-07	9.96807	1.39958	5.59204
TXNRD1	4129.21	4003.77	4191.26	4086.84	4089.14	2984.35	3065.38	3286.72	2.5891e-06	-0.398851	2.91445e-07	-9.95404	0.758462	5.58685
SCPEP1	991.216	940.895	1058.9	1037.09	1049.81	1399.95	1397.64	1560.41	2.69144e-06	0.515872	3.05866e-07	9.91076	1.42986	5.57002
CES1	459.811	474.596	501.347	564.041	540.371	763.868	803.852	769.988	3.02939e-06	0.620492	3.55572e-07	9.77679	1.5374	5.51864
CDKN2A	508.881	521.033	484.542	465.664	490.065	711.817	681.714	676.265	3.11875e-06	0.483072	3.70196e-07	9.74117	1.39772	5.50602
HAX1	1332.46	1566.97	1474.41	1349.07	1425.11	975.535	869.079	974.171	2.7927e-06	-0.60448	3.20975e-07	-9.86771	0.657708	5.55398
KLHL24	827.73	847.755	869.412	873.413	851.951	1084.91	1131.51	1132.13	2.83804e-06	0.385763	3.27231e-07	9.85051	1.30655	5.54698
FAM102B	376.052	363.034	343.411	379.138	361.878	503.354	520.014	515.75	3.38467e-06	0.49311	4.09336e-07	9.6528	1.40748	5.47048
SHMT2	3109.44	3387.87	3282.34	3455.7	3381.42	2555.37	2308.57	2404.11	2.65419e-06	-0.456259	3.00652e-07	-9.92615	0.728874	5.57607
ARID1A	1917.96	1968.84	1768.48	2039.3	1915.26	1393.26	1416.32	1374.1	2.71782e-06	-0.461476	3.0983e-07	-9.89925	0.726243	5.56578
GNB1L	170.658	190.719	201.338	166.16	174.538	98.3321	96.3162	100.269	4.87119e-06	-0.877412	6.44834e-07	-9.26099	0.544343	5.31237
RAB11FIP4	153.346	161.785	201.308	159.819	158.696	80.7735	84.0189	73.2852	5.07755e-06	-1.06693	6.8057e-07	-9.21532	0.477333	5.29435
FUBP1	2013.96	1994.07	1961.94	1846.22	1951.59	1514.58	1472.82	1401.44	2.71782e-06	-0.417123	3.10088e-07	-9.8985	0.748917	5.56578
PSMD11	2739.51	2774.58	2725.76	2705.89	2658.22	2188.02	2145.43	2101.59	2.67915e-06	-0.343104	3.04025e-07	-9.91616	0.788343	5.572
ADAMTS9	204.327	197.751	192.455	198.486	184.133	117.955	123.187	113.165	4.74583e-06	-0.728503	6.24307e-07	-9.28847	0.60353	5.32369
G6PC3	878.786	837.543	769.739	941.191	881.383	1271.9	1224.78	1295.16	2.87762e-06	0.555258	3.33702e-07	9.83309	1.46943	5.54097
ROBO1	925.777	794.358	858.569	1034.85	903.783	1389.62	1409.62	1420.31	2.85339e-06	0.643566	3.2971e-07	9.84379	1.56219	5.54464
FNDC10	186.01	178.302	151.94	204.205	147.481	410.622	316.562	344.359	4.03946e-06	1.04068	5.11769e-07	9.45868	2.0572	5.39368
C2orf49-DT	105.24	100.946	90.7842	102.217	91.9359	51.1517	52.1891	48.7235	5.65556e-06	-0.951468	7.81952e-07	-9.09852	0.517106	5.24752
SPC24	416.854	380.615	363.176	362.003	394.077	552.52	599.735	661.288	3.39396e-06	0.655126	4.11304e-07	9.6486	1.57475	5.46929
ZC3HAV1	3194.18	3139.7	2783.98	3230.87	3014.43	2222.36	2158.62	2000.26	2.72832e-06	-0.529888	3.12319e-07	-9.8921	0.692609	5.5641
PPIL1	1112.78	1069.66	1131.94	1063.19	981.893	717.756	754.907	768.553	3.04233e-06	-0.51972	3.5828e-07	-9.77008	0.697507	5.51679
FABP3	473.192	378.945	454.897	243.422	291.646	1224.33	922.588	1225.51	3.24369e-06	1.64365	3.8906e-07	9.69739	3.12456	5.48896
IFITM3	6241.37	6705.65	5643.9	7853.36	6789.29	12856.7	11800	11408	2.98186e-06	0.861712	3.47027e-07	9.79833	1.81719	5.52551
PRAF2	259.571	245.639	207.207	310.012	282.848	469.333	515.727	480.717	3.688e-06	0.917019	4.57026e-07	9.55663	1.88821	5.43321
PCBP4	1264.03	1334.47	1291.8	1238.85	1345.74	999.655	912.461	912.046	2.95144e-06	-0.460563	3.43242e-07	-9.80806	0.726702	5.52997
RGS2	149.252	192.187	170.7	176.372	165.641	296.183	290.489	270.676	4.22071e-06	0.746379	5.40884e-07	9.41106	1.67758	5.37461
SGCE	786.829	752.094	734.214	809.485	765.206	1078.44	1043.63	1008.66	3.02467e-06	0.439634	3.54517e-07	9.77942	1.35626	5.51932
SH3PXD2B	779.691	768.43	678.935	917.781	736.706	1243.91	1265.83	1259.67	2.98427e-06	0.701113	3.48297e-07	9.7951	1.62576	5.52516
MAP3K20	1553.16	1474.39	1522.75	1544.78	1489.51	1901.15	1998.91	2071.21	2.79797e-06	0.391024	3.21916e-07	9.8651	1.31132	5.55316
FENDRR	433.304	413.746	351.282	535.888	408.978	894.203	785.658	775.441	3.33192e-06	0.94374	4.013e-07	9.67019	1.92351	5.47731
SPAG7	620.245	615.122	636.538	605.224	601.96	808.376	804.608	840.804	3.19772e-06	0.409624	3.81956e-07	9.71361	1.32834	5.49516
PTMAP2	480.283	475.189	451.967	478.672	387.479	817.51	684.33	786.632	3.33568e-06	0.747411	4.02029e-07	9.6686	1.67878	5.47682
CBX8	228.93	250.893	254.603	257.062	263.067	143.992	155.681	158.293	4.64539e-06	-0.717069	6.06087e-07	-9.31368	0.608332	5.33298
NOP16	442.432	450.483	533.942	440.849	432.666	281.704	240.885	266.94	3.98155e-06	-0.805153	5.02974e-07	-9.47364	0.572301	5.39995
FASTKD5	624.316	596.195	607.924	603.595	594.308	433.474	451.883	446.943	3.55381e-06	-0.446293	4.35389e-07	-9.59886	0.733926	5.44931
PLCD3	873.703	877.128	941.462	850.878	841.623	1198.23	1239.41	1154.39	3.04233e-06	0.450031	3.58352e-07	9.7699	1.36607	5.51679
SH3KBP1	1258.9	1187.84	1123.05	1353.4	1176.32	1831.39	1818.26	1701.37	2.93263e-06	0.550304	3.40812e-07	9.81436	1.46439	5.53274
TMEM200B	136.955	129.16	138.145	136.621	152.136	215.419	226.883	223.503	4.70241e-06	0.678125	6.15866e-07	9.30005	1.60006	5.32768
RFTN1	527.259	573.852	609.913	612.427	521.163	338.1	365.209	359.841	3.7467e-06	-0.680254	4.66069e-07	-9.53961	0.624055	5.42635
WDR54	327.039	311.923	333.534	333.055	341.112	449.142	471.858	487.019	3.76734e-06	0.511312	4.69356e-07	9.53351	1.42535	5.42397
MAGI3	439.42	469.179	473.691	436.207	453.907	302.886	314.779	321.863	3.90697e-06	-0.53666	4.90962e-07	-9.49453	0.689365	5.40816
HSPA12B	359.694	393.448	387.846	371.448	386.168	264.554	232.366	252.609	4.15536e-06	-0.606542	5.29409e-07	-9.42949	0.656769	5.38139
PATJ	357.66	342.33	348.356	302.793	336.943	190.421	215.039	209.087	4.36921e-06	-0.720032	5.63535e-07	-9.37587	0.607084	5.3596
GPC4	334.149	350.251	293.083	336.787	317.214	201.331	203.909	193.579	4.43218e-06	-0.70759	5.73126e-07	-9.36142	0.612342	5.35338
FUCA1	303.512	270.595	270.376	249.018	261.967	428.264	398.203	429.447	3.98155e-06	0.630419	5.02778e-07	9.47397	1.54801	5.39995
RACK1	15151.7	15628.5	15941	15031.8	15677.8	11816.4	11807.1	11863.3	3.24369e-06	-0.388306	3.89014e-07	-9.6975	0.764026	5.48896
ARHGAP45	528.334	480.147	546.707	518.373	577.714	357.82	316.392	320.807	3.8977e-06	-0.676899	4.89151e-07	-9.49772	0.625508	5.40919
SEPHS2	1205.75	1181.92	1215.83	1279	1304.73	1598.79	1734.75	1733.22	3.00466e-06	0.448478	3.51922e-07	9.78592	1.3646	5.5222
PTAR1	1476.55	1458.78	1506.96	1566.39	1492.88	1061.93	1179.44	1103.97	3.06353e-06	-0.429006	3.61607e-07	-9.7619	0.742773	5.51378
ACAP3	750.059	747.732	702.626	649.907	759.135	1145.03	1176.59	1004.87	3.20643e-06	0.618441	3.83527e-07	9.70999	1.53522	5.49398
KDELR2	4634	4345.33	4579.09	4661.74	4501.85	5745.58	6036.46	6108.75	3.03716e-06	0.39214	3.56988e-07	9.77327	1.31234	5.51753
TOMM34	965.641	1028.34	1046.09	1010.43	1011.29	1298.07	1321.01	1376.37	3.10148e-06	0.395739	3.67376e-07	9.74792	1.31562	5.50843
APH1B	473.128	397.389	420.383	514.285	466.806	696.052	769.461	746.345	3.55381e-06	0.703593	4.353e-07	9.59904	1.62856	5.44931
ST6GALNAC4	407.76	438.871	379.911	466.529	415.065	622.617	709.567	644.855	3.63791e-06	0.644684	4.48708e-07	9.57261	1.5634	5.43915
NSUN5	713.243	727.245	760.885	781.968	799.041	521.301	536.119	545.548	3.56716e-06	-0.501926	4.37615e-07	-9.59442	0.706163	5.44768
ERMP1	525.239	464.743	522.044	489.016	518.423	692.842	719.223	766.332	3.54085e-06	0.527485	4.33214e-07	9.60323	1.44141	5.45089
EIF2S1	2659.81	2548.44	2671.48	2509.25	2601.44	1934.59	2062.88	2004.49	3.00391e-06	-0.377079	3.51336e-07	-9.7874	0.769995	5.52231
TTC27	780.64	705.768	684.894	675.393	725.079	484.87	500.556	482.026	3.64074e-06	-0.544789	4.49661e-07	-9.57076	0.685491	5.43881
NUDCD1	773.523	778.177	823.064	733.336	734.362	480.336	557.878	511.162	3.60138e-06	-0.57451	4.42709e-07	-9.58433	0.671514	5.44353
ZNF622	832.794	903.343	948.402	966.499	937.523	610.007	637.779	646.786	3.46071e-06	-0.537902	4.20253e-07	-9.62977	0.688772	5.46084
TCF25	1379.51	1467.28	1369.76	1489.99	1547.82	2031.66	1969.06	1936.45	3.04176e-06	0.449536	3.57779e-07	9.77131	1.3656	5.51688
IRX2	212.551	215.634	198.351	203.392	193.34	129.145	124.732	119.96	5.22189e-06	-0.716055	7.05544e-07	-9.1849	0.60876	5.28217
NCOA4	3749.09	3603.46	3578.4	3580.25	3597.18	4626.41	4528.83	4758.22	3.07042e-06	0.356759	3.62933e-07	9.75867	1.28055	5.5128
MTMR10	457.776	516.09	522.077	484.118	504.109	330.418	328.988	343.298	4.07694e-06	-0.570246	5.1739e-07	-9.44926	0.673502	5.38967
VWA5A	531.382	467.258	447.019	647.703	497.647	909.582	984.287	912.346	3.52904e-06	0.863732	4.30307e-07	9.60911	1.81974	5.45234
COL6A2	16097	16661.8	15302.4	18739.3	17333	26759.5	25503.4	24885.4	3.59657e-06	0.614754	4.4182e-07	9.58608	1.5313	5.44411
LGALS3	1631.91	1768.31	1833.59	1812.9	1796.25	2315.93	2426.77	2547.21	3.07723e-06	0.458481	3.63993e-07	9.75609	1.37409	5.51184
ERC1	1607.36	1575.16	1533.59	1690.98	1599.42	1226.41	1211.5	1220.58	3.17521e-06	-0.392145	3.79004e-07	-9.72044	0.761996	5.49823
HSPA4	6004.28	5823.12	6270.59	5845.28	5780.55	4159.88	4558.78	4517.67	3.1597e-06	-0.430738	3.76366e-07	-9.72659	0.741882	5.50035
RUVBL2	1890.38	2000.7	2033.96	1868.52	1894.53	1481.25	1480.3	1464.52	3.12481e-06	-0.392522	3.71434e-07	-9.73823	0.761797	5.50518
STOM	1544	1481.09	1368.77	1710.94	1539.21	2193.57	2334.64	2294.71	3.10944e-06	0.576654	3.68576e-07	9.74504	1.49139	5.50732
ZDHHC2	821.55	842.035	856.613	772.28	835.063	584.241	598.126	613.206	3.60766e-06	-0.463498	4.44079e-07	-9.58164	0.725226	5.44277
TMEM107	162.507	187.986	172.686	159.941	176.137	307.569	259.532	312.255	4.7489e-06	0.770141	6.25498e-07	9.28685	1.70544	5.32341
TRMT2B	266.694	260.518	282.253	276.261	263.141	373.77	419.595	429.948	4.26282e-06	0.592954	5.47339e-07	9.40087	1.50833	5.3703
PORCN	211.538	193.893	203.28	207.667	228.72	333.01	327.194	306.474	4.57854e-06	0.626435	5.95352e-07	9.32892	1.54375	5.33927
TLE2	240.151	306.453	264.483	258.003	245.861	143.345	144.46	144.49	5.16074e-06	-0.862928	6.94671e-07	-9.198	0.549836	5.28729
PLXND1	1271.2	1382.75	1228.63	1328.02	1261.3	1709.48	1725.38	1793.95	3.17151e-06	0.430331	3.78037e-07	9.72269	1.34754	5.49873
FTSJ3	2047.72	1948.91	1947.11	2021.9	1996.95	1498.45	1584.72	1560.51	3.14665e-06	-0.364353	3.74552e-07	-9.73085	0.776817	5.50215
H2BC21	196.224	208.63	185.507	214.627	207.965	321.407	302.403	304.626	4.6659e-06	0.613379	6.10164e-07	9.30797	1.52984	5.33106
EEF1B2	2618.97	2657.9	2865.88	2438.07	2720.02	1965.87	1880.99	1873.51	3.14376e-06	-0.478929	3.73948e-07	-9.73228	0.71751	5.50255
SNX12	783.737	751.386	756.929	852.144	860.131	1114.14	1126.42	1164.05	3.40494e-06	0.504592	4.12917e-07	9.64518	1.41872	5.46789
GLMP	1132.24	1183.34	1179.29	1169.49	1131.39	1845.78	1525.21	1664.51	3.23544e-06	0.530157	3.87534e-07	9.70085	1.44409	5.49007
CCDC25	1022.83	917.021	919.763	932.514	899.464	1298.44	1291	1246.43	3.34575e-06	0.448057	4.03797e-07	9.66475	1.3642	5.47551
SLC39A11	277.973	282.754	279.263	337.679	318.106	452.932	497.015	474.493	4.20519e-06	0.66995	5.37849e-07	9.41589	1.59102	5.37621
RPS6KA2	492.571	519.946	477.614	677.149	560.509	930.969	956.198	1015.76	3.60693e-06	0.836758	4.43691e-07	9.5824	1.78603	5.44286
NUCB1	3351.64	3335.84	3323.77	3663.31	3459.44	4626.11	4486.22	4497.71	3.20941e-06	0.405671	3.8415e-07	9.70856	1.32471	5.49357
NDUFAF1	423.052	397.545	412.504	400.763	462.707	259.245	251.325	282.98	4.50179e-06	-0.663301	5.8362e-07	-9.34591	0.631432	5.34662
NAT10	991.151	1033.73	976.029	1053.12	1038.2	781.311	717.072	748.191	3.53857e-06	-0.444133	4.32642e-07	-9.60439	0.735026	5.45117
SLC7A8	146.178	117.693	121.341	132.943	137.197	245.799	215.164	220.515	5.22189e-06	0.796199	7.0553e-07	9.18491	1.73652	5.28217
TMEM8B	180.916	195.573	179.58	198.917	211.371	297.339	296.168	308.63	4.77506e-06	0.637221	6.3013e-07	9.28058	1.55533	5.32102
TMED10	3609.14	3798.26	3490.54	3950.73	3726.85	4905.56	5022.55	5111.96	3.26672e-06	0.433578	3.92093e-07	9.69057	1.35058	5.48589
LAMB3	214.622	229.299	181.546	348.456	267.441	549.538	641.701	597.878	4.26898e-06	1.29905	5.48485e-07	9.39908	2.46066	5.36968
GDPD5	438.41	454.408	493.427	403.173	460.737	284.141	282.205	283.822	4.50039e-06	-0.663384	5.83066e-07	-9.34672	0.631396	5.34675
NRROS	141.049	143.855	146.038	144.395	135.603	267.497	223.858	224.337	5.22324e-06	0.737716	7.06159e-07	9.18416	1.66753	5.28206
TSC22D2	908.379	927.607	923.732	860.75	900.546	696.183	659.073	655.327	3.68748e-06	-0.431756	4.56406e-07	-9.55781	0.741359	5.43327
IFT172	217.653	201.751	232.906	216.423	230.511	329.595	356.266	325.648	4.72136e-06	0.616547	6.19342e-07	9.29526	1.5332	5.32593
PNP	2027.3	1964.36	2032.96	1952.49	1969.32	1607.88	1516.5	1523.73	3.28455e-06	-0.361069	3.9505e-07	-9.68397	0.778588	5.48352
SLC46A3	90.9691	77.3371	86.8247	92.5014	82.2973	143.919	148.295	153.641	5.99579e-06	0.789936	8.38933e-07	9.03979	1.729	5.22215
ENSG00000280385	168.61	165.57	182.578	187.999	178.046	102.717	107.741	100.941	5.96716e-06	-0.764746	8.34433e-07	-9.04427	0.588557	5.22423
TMEM14A	368.912	388.066	422.377	384.285	354.056	544.928	643.495	632.735	4.11115e-06	0.660322	5.22754e-07	9.44038	1.58044	5.38604
AMFR	1401.95	1322.45	1392.48	1515.35	1435.31	1856.09	1928.26	1976.49	3.34862e-06	0.442903	4.04422e-07	9.66339	1.35934	5.47513
LMF2	1617.59	1809.86	1604.63	1830.34	1788.62	2498.21	2400.76	2394.76	3.33097e-06	0.492838	4.00909e-07	9.67104	1.40721	5.47743
SMC1A	1810.66	1725.48	1663.87	1816.71	1729.46	2267.51	2253.5	2306.32	3.36969e-06	0.380375	4.07245e-07	9.65729	1.30168	5.47241
OMA1	195.178	194.039	193.42	159.051	173.519	285.717	312.454	335.35	5.06845e-06	0.76952	6.7893e-07	9.21736	1.7047	5.29512
DPY19L1	876.743	853.086	947.399	988.004	905.489	1246.05	1277.74	1269.87	3.59657e-06	0.469824	4.41659e-07	9.5864	1.38494	5.44411
WDR3	881.814	874.054	864.513	865.114	883.345	633.799	680.975	671.018	3.89093e-06	-0.401161	4.87979e-07	-9.4998	0.757249	5.40995
ING4	298.369	262.995	251.635	277.877	255.245	389.264	434.406	435.961	4.67088e-06	0.642258	6.11349e-07	9.30632	1.56077	5.3306
CHPT1	518.087	479.447	539.812	534.144	523.601	698.615	767.71	797.729	3.99284e-06	0.538776	5.05063e-07	9.47006	1.45274	5.39872
SF3B6	1694.21	1699.44	1765.52	1544.51	1610.57	1214.9	1214.08	1224.1	3.52904e-06	-0.447831	4.30268e-07	-9.60919	0.733144	5.45234
GCDH	298.391	332.174	343.441	327.325	330.267	195.684	206.043	219.121	5.21089e-06	-0.655182	7.02762e-07	-9.18823	0.634995	5.28309
ZDHHC3	1848.53	1922.78	1928.34	1799.01	1894.31	1421.5	1414.51	1494.64	3.50374e-06	-0.380345	4.2606e-07	-9.61777	0.768254	5.45547
TMEM63A	648.873	721.279	615.795	713.506	676.763	945.094	989.062	952.732	3.8329e-06	0.512955	4.79748e-07	9.51452	1.42697	5.41647
SARAF	2304.23	2131.61	2166.18	2335.2	2301.23	2877.77	3088.43	3059.49	3.4592e-06	0.420704	4.19783e-07	9.63074	1.33858	5.46102
TOE1	443.437	428.074	466.822	400.107	411.186	292.618	257.609	245.957	4.8801e-06	-0.697675	6.47229e-07	-9.25785	0.616565	5.31157
TXNL1	1730.99	1700.3	1743.8	1690.07	1729.33	1383.91	1362.75	1320.66	3.53857e-06	-0.342335	4.32372e-07	-9.60493	0.788764	5.45117
COA7	918.609	895.542	873.386	902.298	866.864	685.291	665.546	680.402	3.93305e-06	-0.396958	4.94892e-07	-9.48763	0.759458	5.40527
WDR74	504.772	544.553	526.017	512.691	504.883	316.66	353.423	373.295	4.58809e-06	-0.57964	5.9709e-07	-9.32643	0.669131	5.33837
TINAGL1	99.1162	128.04	122.4	113.615	124.162	52.6251	55.5845	61.05	7.14768e-06	-1.05671	1.04632e-06	-8.85721	0.480728	5.14584
FTL	18866.1	19513	19647.6	17443.8	17405.1	28465	26168.7	26589.4	4.08807e-06	0.544556	5.19481e-07	9.44579	1.45857	5.38848
ST13	3831.9	4062.27	4126.1	3654.48	3756.91	2911.11	2676.27	2855	3.5196e-06	-0.465031	4.28573e-07	-9.61264	0.724455	5.45351
OSGIN2	990.154	945.454	977.991	1066.85	1012.21	728.031	717.497	645.18	3.94785e-06	-0.519322	4.97214e-07	-9.48359	0.6977	5.40364
PARP1	2861.08	2847.14	2682.33	2778.69	2669.44	3513.47	3598.27	3748.87	3.53227e-06	0.387504	4.30994e-07	9.60772	1.30813	5.45195
GXYLT1	1010.56	991.39	1110.27	1008.03	961.547	578.353	679.347	705.523	3.98379e-06	-0.638993	5.03588e-07	-9.47258	0.642161	5.3997
ARSI	278.957	265.655	308.904	274.455	288.997	420.552	415.301	473.989	4.76295e-06	0.620938	6.27743e-07	9.28381	1.53787	5.32212
ZBTB18	610.015	623.879	616.81	511.614	583.977	345.147	371.661	377.097	4.59481e-06	-0.689436	5.98346e-07	-9.32464	0.620096	5.33773
MIB1	1086.22	1087.79	1111.21	1181.92	1175.59	1451.81	1577.26	1607.66	3.64074e-06	0.453069	4.49432e-07	9.57121	1.36895	5.43881
MPZL3	121.552	121.932	125.365	110.112	119.811	68.6886	61.674	67.8446	7.11349e-06	-0.857699	1.04072e-06	-8.86161	0.551832	5.14792
FAM222B	849.133	949.188	774.69	885.889	866.071	592.843	496.175	502.6	4.20304e-06	-0.70609	5.37211e-07	-9.41691	0.612979	5.37644
ADCY7	176.791	177.626	146.029	185.252	184.847	283.098	312.164	281.985	5.42397e-06	0.751522	7.39883e-07	9.1449	1.68357	5.26568
EFTUD2	2874.42	2931.43	3028.72	3002.79	2974.61	2366.6	2329.25	2361.22	3.56001e-06	-0.332564	4.36444e-07	-9.59675	0.794124	5.44855
ABCA3	224.853	175.509	203.265	179.676	203.455	105.108	102.474	101.48	6.41346e-06	-0.93107	9.1564e-07	-8.96714	0.524469	5.19291
RHEBL1	128.753	147.688	146.073	143.001	149.837	58.8737	71.3355	81.9866	7.03054e-06	-1.02697	1.02684e-06	-8.87263	0.490741	5.15301
BCORL1	800.127	836.659	775.662	905.645	862.434	594.036	534.318	506.537	4.23117e-06	-0.618602	5.42575e-07	-9.40838	0.651302	5.37354
EIF2S2	2282.74	2233.69	2389.25	2069.43	2117.31	1579.2	1595.08	1640.62	3.63663e-06	-0.465324	4.48248e-07	-9.5735	0.724308	5.4393
SH3RF1	576.252	595.692	561.561	521.439	563.613	351.973	366.154	406.026	4.70828e-06	-0.590186	6.17025e-07	-9.29845	0.664257	5.32714
POLR2C	1735.05	1723.8	1855.34	1685.04	1824.2	1297.51	1296.32	1370.84	3.70522e-06	-0.416497	4.59467e-07	-9.552	0.749242	5.43119
DNAJA1	7476.75	7433.74	8097.29	7382.97	7390.36	5369.89	5768.54	5739.29	3.78249e-06	-0.425399	4.72079e-07	-9.52849	0.744633	5.42222
STRIP2	511.947	513.238	484.541	486.48	548.676	714.655	690.967	755.853	4.29707e-06	0.502053	5.53518e-07	9.39124	1.41623	5.36683
ARL6IP5	1534.82	1460.27	1606.61	1421.44	1386.79	2019.16	2016.28	2109.41	3.66251e-06	0.469006	4.52652e-07	9.56499	1.38416	5.43622
MPP6	432.231	395.886	425.344	428.622	478.322	279.46	277.311	244.514	5.13243e-06	-0.694914	6.89627e-07	-9.20415	0.617746	5.28968
NFIA	307.569	289.81	266.444	236.131	264.723	144.649	154.932	139.465	6.02053e-06	-0.891024	8.43032e-07	-9.03573	0.539231	5.22037
PUS1	532.33	519.571	507.271	493.683	547.26	341.226	376.834	359.622	4.82494e-06	-0.53316	6.37113e-07	-9.27122	0.691039	5.31651
ANKRD28	1058.63	1067.94	982.908	1067.52	1008.58	1367.97	1444.31	1342.17	3.83189e-06	0.417465	4.79304e-07	9.51533	1.33558	5.41659
HSD17B10	1798.44	1897.05	1825.71	1688.26	1837.68	1298.56	1348.06	1391.25	3.75122e-06	-0.426591	4.67036e-07	-9.53781	0.744018	5.42583
NUP58	2390.06	2243.83	2405.02	2229.52	2442.36	1788.68	1791.57	1754.1	3.68748e-06	-0.396558	4.56656e-07	-9.55734	0.759669	5.43327
COQ5	352.545	351.885	383.894	374.027	383.555	500.079	536.408	547.708	4.72136e-06	0.516758	6.19522e-07	9.29502	1.43074	5.32593
AKTIP	338.214	366.841	303.952	321.251	371.737	186.337	176.797	210.678	5.66815e-06	-0.831038	7.84633e-07	-9.09566	0.562125	5.24656
ATL3	1623.68	1584.77	1587.88	1513.43	1567.68	1986.7	2162.34	2031.53	3.71347e-06	0.386234	4.60797e-07	9.54949	1.30698	5.43022
TPD52	153.324	162.808	176.641	112.089	160.585	44.9109	62.8745	49.8789	7.57691e-06	-1.54574	1.1236e-06	-8.79891	0.342519	5.12051
ABHD2	1440.81	1429.31	1435.88	1769.03	1503.95	2220.87	2340.7	2453.28	3.7467e-06	0.628822	4.65863e-07	9.53999	1.5463	5.42635
EIF3F	2794.68	2722.82	2961.63	2552.57	2595.43	1986.87	1968.45	1981.14	3.73136e-06	-0.460118	4.63327e-07	-9.54473	0.726927	5.42813
MESD	2261.35	2320.47	2267.82	2206.83	2231.37	1832.08	1748.99	1757.93	3.7467e-06	-0.343261	4.66163e-07	-9.53944	0.788257	5.42635
TNFAIP8L1	253.42	277.86	275.342	255.384	279.566	401.266	424.958	377.03	5.16583e-06	0.580445	6.95828e-07	9.19659	1.49531	5.28686
PLEKHA6	143.083	175.189	149.004	154.027	142.573	255.335	283.344	240.527	5.93841e-06	0.76556	8.29338e-07	9.04938	1.70003	5.22633
DRAM1	605.961	570.932	578.291	753.48	643.217	1007.09	1003.25	1122.97	4.20304e-06	0.73403	5.37226e-07	9.41689	1.66328	5.37644
LYSMD3	1173.08	1254.36	1155.62	1078.68	1109.2	802.174	826.151	830.177	4.1354e-06	-0.492266	5.2618e-07	-9.43476	0.710908	5.38348
GKAP1	179.847	175.07	154.924	159.182	157.212	99.0426	88.9535	92.3504	7.01244e-06	-0.820339	1.02362e-06	-8.87521	0.566309	5.15413
MSANTD3	646.799	627.247	599.031	607.844	663.178	850.126	835.872	848.729	4.30855e-06	0.427533	5.55354e-07	9.3884	1.34493	5.36567
ADAM12	202.348	182.62	170.697	285.136	183.758	417.042	425.003	424.111	5.42183e-06	1.06871	7.3885e-07	9.14607	2.09756	5.26585
BRAP	819.488	841.29	820.103	851.312	840.347	616.684	656.605	606.816	4.42423e-06	-0.414157	5.71733e-07	-9.36351	0.750458	5.35416
SNX9	2204.1	2032.33	2002.35	1993.85	1889.06	2920.69	2689.31	2802.76	3.81356e-06	0.471159	4.76379e-07	9.52063	1.38622	5.41867
C6orf89	1965.99	1841.81	1798.07	1916.13	1777.44	2462.43	2417.98	2435.6	3.82465e-06	0.392105	4.78081e-07	9.51754	1.31231	5.41741
SUMF2	845.083	881.536	813.161	1082.44	922.648	1409.42	1486.08	1590.67	4.02101e-06	0.723595	5.08959e-07	9.46343	1.65129	5.39566
FOXP4	1322.27	1556.39	1403.33	1556.03	1466.24	1041.2	951.454	912.042	4.06808e-06	-0.592705	5.15928e-07	-9.4517	0.663098	5.39061
APH1A	3117.61	2927.9	3166.88	3000.1	3045.92	3881.11	3895.53	3973.89	3.86244e-06	0.360503	4.84086e-07	9.50673	1.28387	5.41314
BICD2	1340.65	1346.63	1442.82	1287.44	1303.63	977.542	1012.38	1007.58	4.08807e-06	-0.426584	5.19476e-07	-9.4458	0.744021	5.38848
CPEB1	179.851	169.836	173.683	187.044	181.428	105.525	111.645	111.161	6.95243e-06	-0.704682	1.00909e-06	-8.88696	0.613578	5.15786
EIF3D	4224.24	4386.06	4318.57	4106.74	4177.72	3352.15	3249.53	3369.35	3.9034e-06	-0.352073	4.9019e-07	-9.49589	0.783458	5.40856
CHST2	355.625	362.173	309.848	408.67	334.278	552.348	587.904	555.075	4.93312e-06	0.679203	6.55896e-07	9.24657	1.60125	5.30688
NXT1	307.56	305.454	324.696	303.107	337.324	200.881	194.915	216.343	5.9313e-06	-0.627038	8.27452e-07	-9.05128	0.647504	5.22685
EEF2K	315.788	318.941	342.427	344.44	353.294	463.866	510.196	540.747	5.05871e-06	0.590804	6.77207e-07	9.21951	1.50609	5.29596
TET1	108.337	101.601	99.657	95.0195	102.161	55.306	49.2674	57.618	8.13315e-06	-0.900147	1.23035e-06	-8.72506	0.535832	5.08974
FBL	2121.32	2224.97	2226.39	2029.51	2018.27	1614.17	1534.83	1588.29	3.92904e-06	-0.426676	4.94061e-07	-9.48908	0.743974	5.40571
RXRA	826.679	794.379	777.638	902.21	850.416	1235.42	1154.71	1127.53	4.19422e-06	0.499075	5.35055e-07	9.42037	1.41331	5.37735
PSD	121.655	116.939	134.189	128.714	119.16	226.777	188.898	216.981	6.53385e-06	0.765163	9.34833e-07	8.94998	1.69956	5.18483
HACD4	257.494	227.638	252.64	206.727	224.316	361.696	366.364	377.348	5.53498e-06	0.661204	7.6161e-07	9.12061	1.5814	5.25688
FBXO17	328.016	328.633	334.546	329.841	307.732	459.378	444.292	494.424	5.16074e-06	0.51612	6.94714e-07	9.19795	1.4301	5.28729
B3GNT9	238.131	245.61	238.796	290.854	291.453	451.866	412.088	419.225	5.39059e-06	0.716135	7.33252e-07	9.15247	1.64278	5.26836
MSI2	847.122	872.061	852.644	816.306	852.069	1113.23	1086.92	1078.53	4.24801e-06	0.366254	5.45086e-07	9.40441	1.289	5.37181
PSIP1	1737.11	1714.16	1736.9	1586.12	1587.36	2509.37	2286.21	2218.89	3.94785e-06	0.482645	4.97735e-07	9.48268	1.3973	5.40364
YBX3	2819.25	2983.19	2929.04	2889.29	2949.63	2309.3	2284.95	2110.65	3.94785e-06	-0.383615	4.97435e-07	-9.4832	0.766515	5.40364
IDI1	1334.54	1191.92	1370.75	950.21	1042.68	2166.56	2168.96	2414.49	4.03946e-06	0.946132	5.11965e-07	9.45835	1.9267	5.39368
PTPN18	423.027	447.011	402.641	450.378	449.039	643.93	605.966	593.887	4.91336e-06	0.502153	6.52047e-07	9.25156	1.41633	5.30862
BCCIP	1706.44	1680.59	1722.1	1496.97	1590.91	1152.77	1211.66	1156.58	4.15239e-06	-0.480721	5.28686e-07	-9.43067	0.716619	5.3817
WAC-AS1	236.044	208.615	224.012	219.828	211.404	411.884	340.499	336.832	5.76723e-06	0.715847	8.00739e-07	9.07867	1.64245	5.23903
MPP1	207.479	263.063	249.667	230.116	241.491	370.7	367.89	383.448	5.68162e-06	0.655129	7.86969e-07	9.09317	1.57476	5.24553
C1QTNF2	160.441	155.172	175.67	129.618	160.758	81.0458	76.3465	74.2256	7.79305e-06	-1.01301	1.1634e-06	-8.77053	0.495511	5.10829
PGM2L1	643.78	624.397	638.493	590.283	630.178	427.312	465.912	450.528	5.05362e-06	-0.480836	6.76106e-07	-9.22088	0.716562	5.2964
KCNMA1	467.017	494.992	506.25	506.362	459.806	726.592	648.833	704.175	4.86272e-06	0.508787	6.4331e-07	9.263	1.42285	5.31312
OCLN	267.708	239.764	269.427	233.704	239.876	158.558	144.539	148.218	6.72991e-06	-0.732686	9.69544e-07	-8.91988	0.601782	5.17199
SHROOM2	130.817	137.954	113.468	119.294	127.127	67.4468	69.8291	62.8603	8.17991e-06	-0.909204	1.23946e-06	-8.71908	0.532479	5.08725
ARHGAP10	622.285	620.338	632.595	591.382	616.653	380.966	429.889	455.24	5.16753e-06	-0.549692	6.96486e-07	-9.1958	0.683166	5.28672
ZNF302	628.43	665.179	635.543	572.179	620.837	844.056	919.748	871.173	4.66504e-06	0.492844	6.09426e-07	9.309	1.40722	5.33114
COPS6	2010.96	2017.86	2082.31	1967.2	2132.8	1564.16	1590.46	1610.64	4.1727e-06	-0.361821	5.31963e-07	-9.42535	0.778182	5.37958
PCDHGC3	383.219	344.765	290.097	546.601	394.534	857.251	845.452	919.582	4.9634e-06	1.18801	6.62088e-07	9.23861	2.27839	5.30422
ZDHHC20	1506.17	1369.86	1379.64	1400.87	1359.48	1827.9	1813.55	1878.26	4.20621e-06	0.39213	5.38328e-07	9.41513	1.31233	5.37611
ACBD4	85.8642	86.0749	86.8267	96.9011	73.6306	151.354	164.076	146.329	7.63074e-06	0.84914	1.13348e-06	8.79176	1.80143	5.11743
CRAT	1380.52	1430.2	1397.4	1379.98	1302.58	1995.99	1783.46	1819.03	4.22071e-06	0.436788	5.40583e-07	9.41154	1.35359	5.37461
RPL24	4197.68	4061.53	4309.68	3727.34	3891.21	2894.1	2897.59	3021.77	4.19528e-06	-0.457159	5.35538e-07	-9.41959	0.728419	5.37724
ANAPC16	891.043	831.504	886.206	812.01	774.606	1153.54	1140.71	1227.25	4.50039e-06	0.486075	5.82985e-07	9.34684	1.40063	5.34675
MET	1186.32	1215.7	1292.83	1128.26	1162.77	837.536	878.048	884.582	4.55896e-06	-0.464858	5.91788e-07	-9.33404	0.724542	5.34113
TCEAL7	264.667	237.036	232.88	257.915	254.418	404.563	401.834	351.713	5.88644e-06	0.629108	8.19242e-07	9.05959	1.54661	5.23015
MEX3C	1489.81	1483.92	1560.26	1407.89	1556.69	1095.02	1161.12	1105.97	4.39866e-06	-0.419738	5.68063e-07	-9.36902	0.74756	5.35668
PHF5A	1095.39	1121.6	1258.29	1073.7	1098.24	803.921	722.014	783.789	4.6659e-06	-0.551725	6.10311e-07	-9.30777	0.682204	5.33106
SEMA3C	569.194	633.98	582.234	830.623	741.389	1184.35	1282.95	1333.56	4.62441e-06	0.929652	6.02584e-07	9.31862	1.90482	5.33494
FOXF1	557.962	552.703	462.801	768.985	575.922	1224.41	1115.57	1123.61	4.74189e-06	1.00264	6.23003e-07	9.29025	2.00366	5.32405
CCT4	5055	4925.92	5327.14	4504.84	4740.83	3200.71	3441.72	3598.09	4.29427e-06	-0.524153	5.52802e-07	-9.39235	0.695367	5.36711
SNX17	1345.76	1394.08	1426.03	1434.71	1368.99	1783.6	1866.62	2048.98	4.29427e-06	0.444786	5.52593e-07	9.39268	1.36111	5.36711
SRP68	2140.73	2144.72	2112.9	2046.87	2061.33	1677.24	1655.78	1678.9	4.2819e-06	-0.33044	5.50499e-07	-9.39593	0.795294	5.36836
PDPR	954.393	985.216	899.031	994.021	1006.2	1266.7	1284.17	1347.82	4.51238e-06	0.425962	5.85368e-07	9.34336	1.34347	5.34559
CCDC82	1206.77	1243.24	1253.34	1129.04	1210.03	901.916	922.865	892.198	4.63223e-06	-0.4151	6.03986e-07	-9.31664	0.749967	5.33421
CASP8	381.118	352.878	346.392	383.717	321.536	540.176	512.941	530.17	5.51873e-06	0.566064	7.57087e-07	9.1256	1.48048	5.25816
RAD54L2	1037.15	1062.09	1040.17	1178.71	1111.26	697.935	802.219	746.119	4.85549e-06	-0.537536	6.41952e-07	-9.26479	0.688947	5.31377
STK4	1286.5	1307.79	1239.5	1289.19	1304.51	989.75	1021.68	1006.42	4.64735e-06	-0.353326	6.06729e-07	-9.31278	0.782777	5.33279
ZNF512B	787.829	855.057	826.018	854.709	847.169	1123.36	1075.91	1083.82	4.73166e-06	0.392262	6.21266e-07	9.29262	1.31245	5.32499
VPS41	1416.27	1383.66	1323.38	1379.2	1385.29	1755.48	1744.07	1724.53	4.45141e-06	0.338692	5.75983e-07	9.35717	1.26461	5.3515
TMCC3	135.973	167.965	148.988	157.316	135.461	58.5447	81.463	70.3661	8.60686e-06	-1.09206	1.32413e-06	-8.66563	0.469092	5.06516
FOXM1	1884.21	1926.71	1872.12	1646.02	1599.53	2926.92	2588.24	2702.09	4.39463e-06	0.619615	5.67178e-07	9.37035	1.53647	5.35708
RCBTB1	785.798	794.485	810.219	761.841	789.376	1019.03	994.135	1046.79	4.83244e-06	0.371734	6.38504e-07	9.26937	1.29391	5.31583
TIMM23	1656.38	1665.04	1650.05	1594.88	1688.17	1287.43	1306.83	1323.95	4.57854e-06	-0.337907	5.95468e-07	-9.32875	0.791188	5.33927
CSTF3	1061.71	1104.98	1116.14	1030.17	1067.91	822.99	825.533	818.825	4.8801e-06	-0.38735	6.47176e-07	-9.25792	0.764532	5.31157
SLC25A4	1045.37	1049.69	1167.47	999.823	1060.14	675.368	737.565	772.57	4.9634e-06	-0.547705	6.6239e-07	-9.23823	0.684107	5.30422
CUL7	853.248	914.413	824.022	970.651	945.093	1249.6	1267.76	1282.44	4.74614e-06	0.493513	6.24741e-07	9.28788	1.40787	5.32366
ZNF25	238.088	227.677	241.782	281.607	235.592	371.978	386.629	370.862	6.29286e-06	0.6244	8.91454e-07	8.98932	1.54157	5.20115
TRMT1	760.207	793.104	802.357	730.93	824.205	539.454	581.445	516.36	5.32197e-06	-0.519288	7.22595e-07	-9.16478	0.697716	5.27393
CDC25A	1363.08	1441.05	1469.49	1372.63	1318.52	942.066	1017.47	1058.56	4.76358e-06	-0.469875	6.28221e-07	-9.28316	0.722027	5.32207
MAPK12	668.281	643.491	622.705	638.912	664.71	894.834	863.747	828.688	5.11342e-06	0.413304	6.86176e-07	9.20839	1.33173	5.29129
ZFYVE21	288.163	281.159	281.251	257.852	261.263	392.054	386.876	424.873	6.21065e-06	0.551389	8.7672e-07	9.00315	1.4655	5.20686
SPATA5L1	300.41	313.272	300.016	291.82	293.279	183.601	210.261	200.024	6.9886e-06	-0.59885	1.01654e-06	-8.88091	0.66028	5.15561
TTC14	502.746	501.183	514.159	503.021	482.344	715.545	703.12	643.851	5.42071e-06	0.455838	7.38249e-07	9.14676	1.37158	5.26594
PRKCD	905.374	976.464	1012.53	926.312	968.208	727.191	644.596	662.446	5.15675e-06	-0.499044	6.93323e-07	-9.19964	0.707576	5.28762
SDF2L1	627.425	646.062	710.553	684.882	718.122	406.575	479.255	445.823	5.63564e-06	-0.610851	7.78731e-07	-9.10198	0.65481	5.24906
COPS7A	925.761	870.475	891.15	884.065	853.926	1166.74	1124.48	1146.45	4.8801e-06	0.3723	6.46449e-07	9.25887	1.29442	5.31157
KCTD13	556.914	641.067	601.007	593.968	581.293	429.045	412.621	398.006	5.77129e-06	-0.526366	8.01781e-07	-9.07758	0.694301	5.23873
NAGLU	645.837	703.796	617.754	823.456	750.655	1128.99	1113.56	1165.53	4.98011e-06	0.68886	6.65446e-07	9.23433	1.61201	5.30276
DSEL	268.758	260.39	253.609	294.394	279.425	384.91	402.994	425.605	6.27805e-06	0.577702	8.88315e-07	8.99225	1.49247	5.20218
GPX7	503.77	475.22	449.009	422.291	417.674	728.436	646.598	693.26	5.50512e-06	0.60569	7.54764e-07	9.12818	1.52171	5.25923
ASIC1	115.535	116.908	136.161	121.714	130.376	225.903	211.583	191.109	7.71632e-06	0.755537	1.14944e-06	8.78036	1.68826	5.11259
CBX7	234.008	243.275	242.772	245.057	245.106	157.888	167.936	151.922	7.55358e-06	-0.604059	1.11826e-06	-8.80279	0.6579	5.12185
TSPY26P	118.555	133.698	107.545	157.773	98.5716	253.414	260.313	233.837	7.58619e-06	1.03742	1.1256e-06	8.79745	2.05255	5.11998
CDC42EP1	1903.66	2327.95	2047.78	1913.6	1947.9	1413.24	1229.24	1248.65	4.74225e-06	-0.643745	6.23442e-07	-9.28965	0.640049	5.32402
SMIM14	441.473	455.264	441.106	591.452	525.354	783.554	855.49	877.52	5.43886e-06	0.78132	7.43176e-07	9.14117	1.7187	5.26449
MELTF	186.019	208.587	221.048	198.924	197.551	306.057	316.28	297.119	6.9336e-06	0.599921	1.00579e-06	8.88966	1.51563	5.15904
RPL22L1	1044.29	1023.25	1105.32	974.107	1116.46	629.861	755.946	711.329	5.25855e-06	-0.592719	7.12241e-07	-9.17694	0.663092	5.27913
LYN	592.687	563.999	586.19	599.924	551.015	422.419	427.004	396.591	5.94997e-06	-0.478661	8.31536e-07	-9.04717	0.717644	5.22549
ENPP1	388.329	415.682	421.383	405.928	405.737	534.64	571.387	567.137	5.88959e-06	0.453272	8.20168e-07	9.05865	1.36914	5.22992
AFAP1L2	99.1919	84.8617	88.7705	97.3951	97.5654	148.457	168.211	157.195	8.50027e-06	0.760806	1.30421e-06	8.67787	1.69444	5.07057
LRRC45	268.784	296.594	311.841	271.626	292.198	414.655	430.292	415.648	6.41346e-06	0.544285	9.15981e-07	8.96683	1.4583	5.19291
ATP13A2	1398.93	1462.08	1530.63	1465.72	1516.83	1118.3	1139.51	1147.45	4.95833e-06	-0.377427	6.60892e-07	-9.24014	0.769809	5.30466
ST6GAL1	522.192	554.556	533.882	548.807	579.523	350.738	352.25	406.338	6.21863e-06	-0.569502	8.78361e-07	-9.0016	0.673849	5.20631
MYL12B	5611.91	5566.87	5955.78	5483.3	5603.39	4053.31	4379.97	4416.5	4.94276e-06	-0.398527	6.57587e-07	-9.24439	0.758632	5.30603
HTRA2	877.777	932.499	1001.68	917.723	994.134	634.119	691.697	671.012	5.49796e-06	-0.505199	7.52415e-07	-9.1308	0.704563	5.2598
MPP2	430.173	407.226	424.365	425.237	393.859	281.732	286.748	302.597	6.73041e-06	-0.518547	9.70174e-07	-8.91934	0.698075	5.17196
TPM1	2368.54	2397.01	2541.25	1924.85	2121.74	1363.1	1388.47	1409.96	4.93312e-06	-0.704259	6.55875e-07	-9.2466	0.613757	5.30688
MICALL2	318.817	297.505	300.985	312.506	306.051	474.694	523.179	423.73	6.41346e-06	0.619483	9.15033e-07	8.96769	1.53632	5.19291
FAM126A	1235.4	1183.54	1185.23	1302.28	1256.39	1642.88	1650.25	1566.28	4.96536e-06	0.394552	6.63064e-07	9.23736	1.31453	5.30405
VAT1	5792.78	5740.21	6058.4	5545.55	5671.23	7563.2	7287.77	7829.68	5.11342e-06	0.391997	6.86226e-07	9.20833	1.31221	5.29129
PUM3	901.232	998.445	927.678	900.623	872.093	689.689	620.628	630.027	5.5629e-06	-0.508014	7.66835e-07	-9.11487	0.70319	5.2547
PSMD13	2375.75	2275.76	2532.33	2479.02	2519.8	1592.51	1792.22	1830.23	4.92078e-06	-0.488814	6.53439e-07	-9.24975	0.712611	5.30797
AGA	366.84	321.607	291.101	357.543	326.621	494.375	529.162	515.717	6.3515e-06	0.629778	9.03293e-07	8.97839	1.54733	5.19712
IRF2BPL	748.007	695.078	609.851	896.201	822.053	1359.09	1323.22	1304.66	5.27828e-06	0.829294	7.15512e-07	9.17308	1.77682	5.27751
R3HCC1L	708.133	693.558	726.342	653.613	637.086	480.427	445.417	489.051	6.0408e-06	-0.534789	8.47235e-07	-9.03159	0.690259	5.21891
MORF4L1	1841.33	1695.11	1831.64	1743.77	1723.29	2268.5	2582.17	2700.52	4.94564e-06	0.50741	6.5838e-07	9.24337	1.4215	5.30578
TMX3	1059.64	1071.47	986.862	1165.55	1139.53	1472.9	1516.74	1522.17	5.1322e-06	0.474084	6.89171e-07	9.20471	1.38904	5.2897
HIBADH	445.546	434.594	467.766	470.915	462.523	642.909	600.183	619.735	6.05137e-06	0.444634	8.50708e-07	9.02819	1.36097	5.21815
UPF2	2065.11	2030.85	2015.2	1912.64	1952.98	1580.68	1525.1	1427.8	5.05076e-06	-0.401673	6.75304e-07	-9.22189	0.75698	5.29664
GAB2	500.704	540.106	520.084	579.427	580.653	364.671	374.481	336.929	6.5551e-06	-0.601946	9.3947e-07	-8.94589	0.658865	5.18342
PTMS	5687.52	5232.06	5746.55	5182.76	5499.29	7566.32	7424.69	7099.27	5.27828e-06	0.429769	7.15787e-07	9.17275	1.34702	5.27751
MYO19	1259.9	1338.22	1317.49	1212.23	1290.07	977.135	924.803	988.817	5.40451e-06	-0.41327	7.35594e-07	-9.14979	0.75092	5.26724
ISG20L2	864.445	915.556	875.372	895.488	839.424	663.96	671.071	658.424	5.82725e-06	-0.401382	8.1052e-07	-9.06853	0.757133	5.23454
PLEKHG3	351.51	388.352	365.15	335.909	321.523	220.039	229.164	208.066	7.62335e-06	-0.682253	1.13175e-06	-8.79301	0.623191	5.11785
DIS3	1776.97	1744.33	1818.81	1682.27	1607.99	1321.6	1280.81	1271.48	5.23584e-06	-0.417658	7.08297e-07	-9.18162	0.748639	5.28101
N4BP2	418.933	372.64	375.01	399.218	398.216	236.455	272.854	264.026	7.31093e-06	-0.610135	1.07688e-06	-8.83362	0.655135	5.13603
ANK2	273.843	199.844	204.255	232.765	244.992	394.729	403.52	383.077	7.22576e-06	0.776332	1.06074e-06	8.84598	1.71277	5.14112
HDAC5	954.487	967.348	1019.39	992.583	976.326	1284.99	1221.24	1312.14	5.42397e-06	0.374096	7.40041e-07	9.14472	1.29603	5.26568
P2RX4	453.713	486.508	451.974	556.871	467.714	724.275	709.876	712.785	6.14741e-06	0.570291	8.67283e-07	9.01214	1.48482	5.21131
STRBP	882.867	847.947	839.822	778.236	822.011	581.203	599.901	626.769	6.02053e-06	-0.46887	8.43393e-07	-9.03538	0.722531	5.22037
MANBAL	777.606	792.879	743.111	804.45	830.85	1060.31	1027.68	1037.06	5.62431e-06	0.400084	7.767e-07	9.10416	1.31958	5.24993
RAB3IP	333.126	358.925	360.215	319.413	338.804	232.297	209.908	231.651	7.71632e-06	-0.607933	1.14949e-06	-8.78033	0.656136	5.11259
ZSWIM6	604.945	666.856	660.218	656.302	662.163	459.015	489.935	444.101	6.39471e-06	-0.48668	9.11713e-07	-8.9707	0.713666	5.19418
KIFBP	1154.65	1103.43	1161.56	1097.92	1085.28	1404.75	1455.16	1452.43	5.38467e-06	0.359708	7.32001e-07	9.1539	1.28317	5.26884
MAP1S	1290.58	1399.38	1315.5	1410.58	1306.28	1047.86	980.103	963.3	5.49916e-06	-0.4308	7.53034e-07	-9.1301	0.74185	5.2597
DYNLT3	936.01	967.901	996.741	926.362	951.909	1222.12	1219.16	1310.98	5.49086e-06	0.388027	7.50987e-07	9.13239	1.3086	5.26036
COL12A1	3754.16	3414.67	3188.59	4042.19	3501.92	2365.05	2430.14	2358.65	5.21265e-06	-0.581548	7.03431e-07	-9.18743	0.668246	5.28294
RBM42	1942.49	2153.49	2061.59	2061.71	2019.28	1583.61	1561.52	1609	5.28649e-06	-0.369231	7.17339e-07	-9.17093	0.774195	5.27683
RPL27A	3654.06	3880.54	3762.96	3458.17	3552.49	2763.46	2845.82	2741.23	5.25855e-06	-0.394646	7.1211e-07	-9.17709	0.760676	5.27913
NRGN	721.456	688.113	744.08	713.19	717.788	1161.49	953.364	1022.26	5.76723e-06	0.539991	8.00294e-07	9.07913	1.45396	5.23903
MMP11	92.0412	99.6371	133.209	102.639	96.7197	192.161	189.87	195.319	9.13193e-06	0.885208	1.42535e-06	8.60634	1.84703	5.03944
TTLL11	166.579	165.508	188.497	180.086	188.371	100.478	111.664	98.4132	9.60263e-06	-0.777015	1.5118e-06	-8.55915	0.583573	5.01761
CMBL	166.576	176.801	171.707	193.14	177.099	257.104	314.401	307.326	8.05648e-06	0.72421	1.21408e-06	8.73586	1.652	5.09385
CPXM1	139.024	135.939	143.066	175.644	150.206	279.347	240.828	246.371	8.37581e-06	0.781914	1.28234e-06	8.69154	1.71941	5.07697
PLAA	1327.35	1402.88	1389.53	1344.74	1370.88	1007.79	1078.04	1082.84	5.54711e-06	-0.372606	7.63739e-07	-9.11827	0.772386	5.25593
TP53BP2	1304.86	1394.31	1318.47	1275.46	1342.54	997.127	987.547	1050.55	5.57908e-06	-0.391159	7.69991e-07	-9.11143	0.762517	5.25344
RASSF3	961.562	1002.38	949.36	1057.22	1023.32	725.046	755.725	741.718	5.9225e-06	-0.430178	8.25733e-07	-9.05301	0.74217	5.2275
MTMR2	1552.15	1483.86	1524.73	1420.84	1399.11	1027.6	1059.21	1146.06	5.5629e-06	-0.454503	7.66403e-07	-9.11535	0.729762	5.2547
CORO1A	132.892	129.054	144.063	129.569	151.162	70.8751	75.6057	82.0286	1.04337e-05	-0.852832	1.67754e-06	-8.47626	0.553697	4.98156
SLC39A9	1291.58	1171.48	1207.93	1327.46	1290.01	1639.42	1725.18	1695.61	5.43886e-06	0.425032	7.42852e-07	9.14153	1.3426	5.26449
RABGGTB	848.096	817.06	965.197	774.088	843.764	534.847	560.515	568.27	6.29918e-06	-0.611639	8.93915e-07	-8.98704	0.654453	5.20072
NUFIP2	2697.62	2641.61	2801.74	2832.33	2675.39	1997.52	2165.82	2138.67	5.35263e-06	-0.378051	7.27201e-07	-9.15944	0.769476	5.27143
PARN	560.966	532.314	521.068	581.133	597.874	783.87	752.26	788.679	6.2429e-06	0.47349	8.82307e-07	8.99788	1.38846	5.20461
TGFBR1	1059.67	1062.67	1120.09	1191.38	1152.27	1448.02	1593.52	1540.65	5.53498e-06	0.451276	7.61346e-07	9.1209	1.36725	5.25688
TIMM10	549.763	637.611	602.981	583.557	623.53	408.226	413.95	424.496	6.82565e-06	-0.525613	9.87243e-07	-8.90497	0.694664	5.16586
PDK1	455.789	406.771	487.491	394.404	383.937	662.454	650.628	653.909	6.57874e-06	0.629045	9.43949e-07	8.94196	1.54654	5.18186
PIK3AP1	181.848	171.835	160.869	127.102	164.366	69.5851	79.8301	67.0755	1.05599e-05	-1.15503	1.70086e-06	-8.46531	0.449057	4.97634
ARHGEF9	285.131	300.876	297.028	330.663	296.466	458.486	414.787	448.737	7.2372e-06	0.545904	1.06362e-06	8.84376	1.45993	5.14043
EIF3J	1700.31	1727.22	1654.99	1600.95	1713.99	1294.6	1342.53	1270.57	5.53498e-06	-0.366353	7.61198e-07	-9.12106	0.775741	5.25688
PSMC3	3685.73	3506.89	3945.54	3690.35	3723.74	2586.03	2776.58	2889.93	5.43886e-06	-0.432169	7.43425e-07	-9.14089	0.741147	5.26449
DDX49	766.363	836.146	828.004	775.886	855.04	600.953	593.743	575.015	6.3515e-06	-0.460107	9.03446e-07	-8.97825	0.726932	5.19712
MPP5	1039.13	944.042	1005.66	908.461	947.94	711.99	679.626	704.066	6.13005e-06	-0.471088	8.63309e-07	-9.01596	0.72142	5.21254
ATIC	2096.77	2006.72	2076.39	2031.38	1992.6	1615.84	1629.58	1648.58	5.50512e-06	-0.32318	7.54647e-07	-9.12831	0.799306	5.25923
CARD8	387.278	394.239	371.055	404.371	396.435	532.322	594.757	529.274	6.91441e-06	0.498447	1.00186e-06	8.89288	1.41269	5.16024
TMEM59	3842.13	3686.84	3723.44	3981.8	3945.23	4795.05	5251.9	5322.37	5.57866e-06	0.41666	7.6947e-07	9.112	1.33483	5.25347
KAZALD1	290.228	288.819	288.149	343.769	289.623	427.697	469.697	476.94	7.32262e-06	0.611693	1.08002e-06	8.83124	1.52805	5.13533
SLC6A8	1558.33	1664.83	1692.47	1741.11	1781.74	2218.87	2244.79	2233.99	5.52099e-06	0.405194	7.57854e-07	9.12475	1.32427	5.25798
LHFPL2	780.679	732.338	773.706	781.856	754.991	986.219	974.497	988.112	6.05522e-06	0.362516	8.51766e-07	9.02716	1.28567	5.21787
DHCR7	2184.72	2110.69	2221.43	1735.55	1808.89	3399.01	3106.08	3583.66	5.53309e-06	0.745834	7.59974e-07	9.12241	1.67694	5.25703
NEK9	1298.73	1139.54	1149.7	1379.47	1264.19	1749.15	1817.85	1898.71	5.65794e-06	0.550867	7.8275e-07	9.09767	1.46497	5.24734
SOX11	788.895	905.727	814.151	811.1	853.78	538.794	614.965	575.532	6.53385e-06	-0.534296	9.35342e-07	-8.94953	0.690496	5.18483
ZNF517	134.893	137.981	112.479	135	123.664	211.517	216.003	201.429	9.32601e-06	0.704741	1.46028e-06	8.58692	1.62985	5.0303
MERTK	92.0013	103.41	111.517	101.197	100.488	57.5504	56.0514	49.762	1.17383e-05	-0.904534	1.94406e-06	-8.35978	0.534205	4.93039
PMM2	839.938	886.968	868.457	886.751	868.651	672.474	681.55	661.898	6.36696e-06	-0.373103	9.07228e-07	-8.97478	0.77212	5.19607
NATD1	1042.28	1205.29	1103.32	1180.24	1123.98	825.291	824.392	799.821	6.11613e-06	-0.468189	8.60842e-07	-9.01834	0.722872	5.21352
CSNK2A2	1200.62	1223.53	1213.87	1153.44	1224.81	922.196	965.467	913.508	6.05137e-06	-0.366201	8.49844e-07	-9.02904	0.775823	5.21815
ZNF503	356.679	443.254	405.58	437.08	397.879	606.985	647.389	596.257	6.9886e-06	0.600082	1.01666e-06	8.88082	1.5158	5.15561
COL6A3	5965.49	5666.71	5271.84	7249.67	6373.77	9998.77	10302	11441.1	6.05137e-06	0.799522	8.49842e-07	9.02904	1.74052	5.21815
DERL2	899.225	923.031	928.644	945.5	927.858	723.785	714.254	727.55	6.36041e-06	-0.357178	9.0524e-07	-8.9766	0.78069	5.19652
RHNO1	730.568	624.6	620.741	674.603	653.635	1097.95	917.303	985.342	6.29459e-06	0.596405	8.9222e-07	8.98861	1.51194	5.20103
TCEAL9	1207.83	1232.62	1221.73	1321.2	1337.16	1676.86	1803.18	1645.57	5.80021e-06	0.434842	8.0628e-07	9.07291	1.35176	5.23656
NUAK1	506.834	531.447	525.018	561.186	547.874	379.747	396.358	380.895	7.3664e-06	-0.471057	1.08811e-06	-8.82513	0.721436	5.13274
SREBF2	2696.64	2706.07	2759.28	2647.54	2500.46	3440.09	3379.67	3647.73	5.71927e-06	0.390685	7.92657e-07	9.08715	1.31102	5.24266
NUP98	3314.79	3247.3	3267.55	3166.48	3126.87	2588.47	2510.16	2602.11	5.7217e-06	-0.328644	7.93468e-07	-9.08629	0.796285	5.24248
TNFRSF10D	1849.49	1750.47	2108.98	1727.42	1793.12	1195.68	1178.54	1311.26	5.91977e-06	-0.585231	8.24861e-07	-9.05389	0.666543	5.2277
PIM3	1169.99	1211.31	1209.91	1234.82	1217.8	963.601	951.359	951.706	6.14741e-06	-0.33861	8.67154e-07	-9.01227	0.790803	5.21131
TMEM47	408.753	368.991	349.325	431.998	384.199	555.583	608.045	642.163	7.18521e-06	0.632767	1.05301e-06	8.85198	1.55054	5.14356
PTPN21	674.385	718.87	709.583	739.725	708.835	528.128	518.666	542.479	6.92807e-06	-0.422905	1.00441e-06	-8.89079	0.745921	5.15939
ENTPD7	619.199	642.959	585.226	617.538	645.236	401.941	469.234	404.281	7.24715e-06	-0.551376	1.06569e-06	-8.84217	0.682369	5.13983
SNX11	709.138	726.501	712.531	713.553	780.219	443.941	542.945	489.823	7.00619e-06	-0.569886	1.02192e-06	-8.87658	0.67367	5.15452
SGSH	601.884	606.317	584.209	744.736	676.762	1008.31	946.61	1016.58	6.50354e-06	0.628474	9.29925e-07	8.95433	1.54593	5.18685
CXCR4	94.1035	139.396	152.946	111.239	126.871	44.915	44.2914	50.489	1.21169e-05	-1.40457	2.02585e-06	-8.32743	0.377729	4.91661
TMEM51	374.007	404.584	324.655	434.731	369.649	586.232	614.558	604.707	7.31371e-06	0.663967	1.0779e-06	8.83284	1.58443	5.13586
APLP2	7024.1	7108.39	7148.89	7900.76	7602.73	9780.16	9879.13	9941.96	6.30936e-06	0.425001	8.95883e-07	8.98521	1.34257	5.20001
MTHFR	324.983	318.055	306.888	373.08	342.92	493.327	500.789	476.531	7.71632e-06	0.559672	1.14788e-06	8.78147	1.47393	5.11259
TBC1D17	572.279	614.832	619.732	614.498	617.186	900.835	789.673	828.701	6.73444e-06	0.465257	9.71314e-07	8.91838	1.38056	5.1717
MOB1A	2836.58	2573.41	2693.18	2665.11	2648.69	3392.88	3413.59	3552.94	5.93841e-06	0.36417	8.29429e-07	9.04929	1.28714	5.22633
ATM	1276.28	1110.91	1185.22	1302.18	1207.23	1625.39	1825.84	1708.8	6.05137e-06	0.500434	8.50723e-07	9.02817	1.41464	5.21815
ABTB1	253.462	262.849	270.38	264.697	311.215	414.73	416.388	395.76	8.15014e-06	0.588211	1.2336e-06	8.72292	1.50338	5.08884
NDUFAF2	522.177	495.865	488.485	488.164	494.301	378.137	343.11	347.541	7.87185e-06	-0.483176	1.17908e-06	-8.75963	0.715401	5.10392
FES	138.968	120.622	120.383	139.407	108.959	221.894	206.726	207.799	9.96159e-06	0.75931	1.58788e-06	8.51996	1.69268	5.00167
GNPDA1	1148.54	1109.38	1173.39	1151.58	1143.73	1439.62	1618.95	1712.81	6.13118e-06	0.470208	8.63976e-07	9.01532	1.38531	5.21246
CTDSP1	1424.46	1531.18	1437.86	1515.13	1414.44	1910.62	1891.1	1842.3	6.0408e-06	0.36192	8.46936e-07	9.03189	1.28513	5.21891
TRPC1	294.282	207.567	238.802	269.198	266.49	425.45	423.793	441.519	8.24602e-06	0.76321	1.25563e-06	8.70857	1.69726	5.08376
HYLS1	198.236	163.689	192.435	197.396	179.601	295.247	308.553	276.831	9.1129e-06	0.657401	1.42162e-06	8.60844	1.57724	5.04034
GAS2L1	543.623	603.961	543.76	489.886	496.018	862.543	792.942	769.989	6.99527e-06	0.596801	1.01937e-06	8.87863	1.51236	5.1552
HUWE1	6453.9	6669.43	6296.24	7086.98	6600.09	5001.7	5060.06	5122.21	6.28469e-06	-0.386439	8.89775e-07	-8.99089	0.765016	5.20172
UNG	562	614.402	612.861	602.753	555.545	787.944	864.227	942.821	6.95911e-06	0.54994	1.01122e-06	8.88523	1.46402	5.15745
PPP3CC	444.494	471.995	467.787	406	470.507	314.644	297.171	283.044	8.3735e-06	-0.600106	1.28129e-06	-8.6922	0.659705	5.07709
MYO1D	552.889	626.795	671.048	581.451	576.598	360.433	404.746	394.936	7.88237e-06	-0.635627	1.18261e-06	-8.7572	0.643661	5.10334
ACOT7	1760.62	1832.39	1934.28	1709.99	1656.17	1238.52	1313.18	1308.65	6.29515e-06	-0.465485	8.92821e-07	-8.98805	0.724227	5.20099
SAMD4A	987.108	1004.94	988.837	1070.19	995.731	793.815	753.027	746.461	6.82565e-06	-0.401032	9.87297e-07	-8.90493	0.757316	5.16586
TMEM143	65.4216	65.4063	66.1061	64.7789	58.2203	108.273	108.737	106.063	1.22442e-05	0.750386	2.04915e-06	8.31847	1.68224	4.91207
SLC19A1	260.582	279.498	273.359	305.746	300.206	412.518	413.866	407.604	8.37335e-06	0.537816	1.28057e-06	8.69265	1.45177	5.0771
FAM241B	341.221	316.046	339.524	307.627	361.742	185.224	224.535	203.948	9.4152e-06	-0.706588	1.47628e-06	-8.57818	0.612768	5.02617
ARL5B	1384.58	1292.24	1279.97	1347.25	1260.6	926.695	995.22	1019.01	6.5655e-06	-0.421961	9.41506e-07	-8.9441	0.74641	5.18273
TMTC3	1311.01	1273.31	1244.44	1244.17	1199.54	1566.78	1624.98	1692.25	6.34114e-06	0.375454	9.00921e-07	8.98057	1.29725	5.19783
C12orf4	674.428	728.088	695.739	741.181	715.447	505.489	530.123	538.891	7.47911e-06	-0.437869	1.106e-06	-8.8118	0.738224	5.12615
HSP90AB3P	581.38	541.918	534.898	501.37	491.911	345.366	336.115	372.623	8.2103e-06	-0.592914	1.24611e-06	-8.71474	0.663003	5.08564
OAT	2758.96	2622.42	2670.46	2369.55	2448.91	3456.06	3521.26	3722.38	6.27695e-06	0.471999	8.87639e-07	8.99288	1.38703	5.20225
NOL11	1835.18	1851.55	1747.76	1538.56	1640.83	1194.31	1172	1199.77	6.48577e-06	-0.531412	9.26845e-07	-8.95708	0.691877	5.18804
MTURN	540.567	588.35	586.204	489.87	561.499	337.18	375.542	360.13	8.22416e-06	-0.626227	1.24889e-06	-8.71293	0.647869	5.08491
PDIA5	460.838	416.592	395.721	466.748	447.178	611.082	643.378	622.324	7.71632e-06	0.518477	1.15003e-06	8.77995	1.43244	5.11259
SSH1	980.966	924.677	896.063	1183.82	964.788	1536.92	1533.52	1517.02	6.54419e-06	0.634425	9.37364e-07	8.94775	1.55232	5.18414
FGFRL1	1307.97	1433.76	1379.64	1350.63	1418.89	1084.17	1021.5	966.617	6.64144e-06	-0.429234	9.54046e-07	-8.93317	0.742656	5.17774
PATZ1	293.276	276.789	282.234	272.596	291.451	389.042	384.728	416.79	8.62253e-06	0.486639	1.32726e-06	8.66373	1.40118	5.06437
LTK	162.518	175.777	166.76	159.049	176.101	96.7213	101.452	75.2046	1.18342e-05	-0.892182	1.9668e-06	-8.35064	0.538798	4.92686
MAP3K1	425.089	432.186	422.378	435.524	429.097	313.2	313.1	322.846	8.60686e-06	-0.439801	1.32394e-06	-8.66575	0.737236	5.06516
RTF1	1655.36	1519.15	1495.1	1537.7	1611.58	2165.84	1983.17	2065.15	6.36696e-06	0.405859	9.07161e-07	8.97485	1.32488	5.19607
ZFHX2	172.696	175.971	210.227	186.228	205.743	113.547	85.647	79.0268	1.17683e-05	-1.04841	1.95391e-06	-8.3558	0.4835	4.92929
CARHSP1	722.49	705.315	787.5	726.122	699.63	938.845	1030.53	1049.54	6.99527e-06	0.465845	1.01882e-06	8.87907	1.38113	5.1552
KBTBD6	261.602	244.841	261.512	264.879	238.876	349.666	379.82	403.99	8.87971e-06	0.570035	1.37862e-06	8.63313	1.48456	5.0516
MRPS9	560.981	576.348	546.728	507.303	568.493	383.247	394.916	397.028	8.22525e-06	-0.493523	1.24974e-06	-8.71238	0.710289	5.08485
MRPL3	1708.48	1775.63	1661.9	1550.74	1547.92	1177.19	1170.11	1235.87	6.60969e-06	-0.463012	9.48938e-07	-8.93761	0.72547	5.17982
RARRES2	186.024	182.553	208.21	182.371	166.42	348.627	275.361	328.597	9.66085e-06	0.773284	1.52472e-06	8.55235	1.70916	5.01498
SIDT2	388.312	442.622	362.163	466.821	438.623	676.144	664.297	624.465	7.88237e-06	0.647505	1.18165e-06	8.75786	1.56646	5.10334
FAM221A	115.454	119.177	111.522	96.0016	118.813	52.5256	46.0408	63.9515	1.35912e-05	-1.06243	2.32777e-06	-8.21904	0.478825	4.86674
WWC1	566.093	582.365	568.441	554.136	577.938	381.049	420.723	433.102	8.23851e-06	-0.470286	1.25378e-06	-8.70977	0.721822	5.08415
ADD3	1136.28	1026.45	976.983	1289.39	1076.56	1648.94	1706.9	1767.4	6.66405e-06	0.639288	9.57846e-07	8.92989	1.55756	5.17626
TIA1	991.185	986.854	1031.28	928.05	1016.44	1270.75	1320.93	1277.7	6.83688e-06	0.380771	9.89489e-07	8.9031	1.30204	5.16514
SNF8	1125.04	1109.37	1198.07	1195.79	1245.33	823.081	822.336	907.814	7.05335e-06	-0.464937	1.03121e-06	-8.86914	0.724503	5.1516
NFIX	1108.72	1167.9	1117.12	1250.18	1236.5	1606.75	1581.12	1541.28	6.73498e-06	0.423762	9.72329e-07	8.91752	1.34142	5.17166
RND2	370.953	378.569	412.511	366.089	389.454	246.376	250.077	277.663	9.42435e-06	-0.572081	1.47922e-06	-8.57659	0.672646	5.02575
SRP9P1	501.712	480.502	479.617	444.934	430.684	674.066	660.226	635.722	7.96447e-06	0.491565	1.19757e-06	8.74698	1.40597	5.09884
PTPN3	408.73	393.352	422.388	406.102	421.447	304.722	291.359	275.987	9.16446e-06	-0.498114	1.43119e-06	-8.60306	0.708032	5.03789
SNHG16	1167.92	1119.94	1051.03	1019.13	1007.88	783.21	751.871	702.806	7.32262e-06	-0.523825	1.08065e-06	-8.83076	0.695525	5.13533
FHL1	1364.15	1299.97	1328.32	1335.93	1264.86	1631.71	1731.75	1679.79	6.72991e-06	0.350379	9.69404e-07	8.92	1.2749	5.17199
CCT7	8027.51	7811.63	8463.43	7357.82	7625.99	5684.6	5750.66	6048.82	6.95659e-06	-0.42996	1.01027e-06	-8.886	0.742283	5.1576
HCMVUS6	746.044	880.214	955.243	847.945	923.884	1373.24	1568.37	1593.11	1.24449e-06	0.798155	1.11026e-07	10.8512	1.73888	5.90501
XBP1	2253.14	2343.98	2368.5	2592.55	2466.48	1825.23	1803.51	1802.72	6.69544e-06	-0.407876	9.62913e-07	-8.92554	0.753732	5.17422
RPL4P4	2307.27	2299.23	2366.54	2013.06	2116.39	1531.86	1473.42	1647.09	6.73498e-06	-0.516715	9.72508e-07	-8.91736	0.698962	5.17166
IGLON5	213.622	209.248	209.181	236.977	201.674	423.74	350.75	323.44	9.66085e-06	0.766611	1.52402e-06	8.55272	1.70127	5.01498
RHOQ	1915.94	1840.91	1791.16	1790.46	1738.68	2450.14	2266.51	2358.07	6.69576e-06	0.377521	9.63514e-07	8.92503	1.29911	5.1742
SYDE2	93.0089	120.074	130.295	112.651	118.836	59.0952	54.8074	47.4163	1.40515e-05	-1.09702	2.42733e-06	-8.18657	0.467481	4.85228
RPL38	4158.87	4344.49	4314.6	4251.25	4554.37	3001.32	3459.87	3085.1	6.74714e-06	-0.444805	9.74823e-07	-8.9154	0.734683	5.17088
EPHA4	451.655	498.734	456.921	551.809	545.464	292.982	308.342	317.884	9.09671e-06	-0.704383	1.41814e-06	-8.61041	0.613705	5.04112
SHC3	242.233	255.889	302.953	359.368	300.807	512.689	547.525	500.376	8.83667e-06	0.844561	1.37047e-06	8.6379	1.79572	5.05371
CEBPD	343.385	406.184	390.784	417.233	410.067	598.755	572.787	559.367	8.4014e-06	0.555049	1.28765e-06	8.6882	1.46922	5.07565
CTBP2	1448.95	1484.74	1519.79	1426.91	1459.37	1162.3	1159.71	1178.49	6.99527e-06	-0.330918	1.01869e-06	-8.87917	0.79503	5.1552
DCTN4	1335.53	1349.29	1247.4	1358.56	1332.95	1654.9	1699.66	1716.19	6.86967e-06	0.351809	9.94803e-07	8.89869	1.27616	5.16306
SLC25A1	1059.7	1041.77	1228.64	971.072	1129.69	1560.65	1619.85	1573.38	7.00619e-06	0.549469	1.02212e-06	8.87641	1.46355	5.15452
CEBPZ	1206.79	1251.75	1248.39	1200	1166.86	970.532	912.731	935.173	7.30296e-06	-0.369914	1.0751e-06	-8.83497	0.773829	5.1365
MLST8	489.476	522.751	482.567	494.295	453.85	705.309	681.673	644.85	8.17778e-06	0.47172	1.23846e-06	8.71973	1.38676	5.08736
PLEKHG6	144.144	145.403	159.848	152.078	128.533	87.3305	77.4569	81.2318	1.32154e-05	-0.829074	2.24675e-06	-8.24658	0.56289	4.87892
BRIX1	802.13	922.478	884.257	739.379	829.099	547.02	516.785	558.615	8.08602e-06	-0.624704	1.22188e-06	-8.73066	0.648553	5.09227
FKBP10	4145.6	4074.29	3743.18	4782.05	4313.39	6591.2	6250.07	6107.21	7.05335e-06	0.588585	1.03134e-06	8.86904	1.50377	5.1516
KCNAB2	192.157	168.661	162.792	195.391	165.532	279.799	272.555	271.886	1.05599e-05	0.640659	1.706e-06	8.46291	1.55904	4.97634
CERS6	725.517	727.15	677.966	726.365	717.097	537.675	551.853	534.539	8.19956e-06	-0.401098	1.24312e-06	-8.71669	0.757282	5.08621
TMTC1	719.389	711.579	697.703	806.119	759.276	973.234	1040.69	1082.5	7.533e-06	0.482573	1.11459e-06	8.80548	1.39723	5.12303
BCOR	793.993	863.468	760.859	805.092	828.874	617.015	563.464	569.641	8.0625e-06	-0.473988	1.21566e-06	-8.73481	0.719972	5.09353
FTSJ1	939.076	1005.04	1001.68	866.555	968.28	702.917	671.821	642.151	7.81971e-06	-0.505844	1.16933e-06	-8.76639	0.704248	5.10681
NEURL1B	86.9197	102.375	98.6581	101.025	98.5803	150.451	175.719	161.089	1.24269e-05	0.741146	2.08694e-06	8.30416	1.6715	4.90564
KLHL28	360.713	369.223	393.771	413.17	406.036	240.105	263.623	267.132	9.89933e-06	-0.596659	1.57549e-06	-8.5262	0.661284	5.00439
CTSL	5012.11	5077.67	5062.64	5272.04	5546.68	6634.22	6832.22	6807.27	7.23309e-06	0.380643	1.06242e-06	8.84469	1.30192	5.14068
ADGRE5	880.87	955.62	963.165	1131.62	993.905	1416.59	1441.5	1487.97	7.25714e-06	0.561138	1.06776e-06	8.84058	1.47543	5.13923
MAP7D3	758.169	732.556	696.738	680.589	674.224	525.774	505.841	472.381	8.50286e-06	-0.499294	1.30531e-06	-8.67719	0.707453	5.07043
RAMP1	519.156	543.132	556.567	502.668	559.509	392.838	383.766	376.534	9.09671e-06	-0.479283	1.41835e-06	-8.61029	0.717334	5.04112
MLX	1039.22	1086.95	1182.28	1000.79	987.076	752.895	698.723	726.561	7.86105e-06	-0.542313	1.17681e-06	-8.7612	0.686669	5.10452
SPTLC1	1339.62	1268.95	1239.5	1335.13	1294.19	1681.35	1605	1718.5	7.18577e-06	0.365279	1.05368e-06	8.85146	1.28813	5.14353
RASSF7	214.573	227.038	233.908	197.389	224.596	137.946	133.563	137.746	1.20996e-05	-0.681648	2.02195e-06	-8.32894	0.623453	4.91723
ACVRL1	472.109	450.122	431.239	604.534	453.857	934.821	845.781	767.985	8.2993e-06	0.822494	1.26512e-06	8.70248	1.76846	5.08096
NDUFB3	885.951	881.527	843.76	812.821	859.794	583.219	656.625	640.973	8.23851e-06	-0.452825	1.25381e-06	-8.70975	0.730611	5.08415
GOLM2	1640.05	1515.58	1595.76	1766.34	1614.03	2217.75	2101.07	2247.05	7.17548e-06	0.429486	1.05098e-06	8.85356	1.34675	5.14415
MTFR2	163.503	171.677	161.842	160.12	178.075	102.745	105.098	106.462	1.31452e-05	-0.670505	2.23264e-06	-8.25149	0.628287	4.88123
SELENOS	953.396	975.562	1038.19	1051.97	1038.77	765.841	764.912	759.647	7.96466e-06	-0.405655	1.19826e-06	-8.74651	0.754894	5.09883
AMER1	242.17	245.911	229.938	248.57	259.841	162.982	156.643	166.538	1.17392e-05	-0.595465	1.94615e-06	-8.35893	0.661831	4.93036
WARS2-AS1	297.289	225.135	224.015	256.424	262.465	393.223	415.072	427.308	9.95215e-06	0.710172	1.58555e-06	8.52113	1.636	5.00208
METTL9	1891.41	1931.57	1890.84	2022.68	1943.51	2374.96	2453.58	2459.48	7.2186e-06	0.327707	1.05909e-06	8.84726	1.25502	5.14155
ANKRD53	116.457	125.396	121.41	129.37	101.5	67.1959	52.8635	57.942	1.50624e-05	-1.00437	2.64545e-06	-8.12013	0.498488	4.8221
ABCA1	566.135	531.096	443.061	760.305	632.779	1134.59	1215.03	1139.85	8.07612e-06	1.00969	1.21905e-06	8.73255	2.01348	5.0928
TM7SF2	272.897	272.184	279.248	223.728	271.319	428.445	385.649	460.711	9.98391e-06	0.688378	1.59392e-06	8.51694	1.61147	5.0007
CREG1	1160.81	1042.82	1222.74	1055.31	1087.71	1548.42	1488.36	1571.93	7.55631e-06	0.466404	1.11929e-06	8.80204	1.38166	5.12169
EXT1	1640.04	1588.15	1454.63	1836.58	1653.67	2321.8	2399.42	2330.1	7.32262e-06	0.527962	1.08103e-06	8.83047	1.44189	5.13533
CYB5A	803.192	847.89	814.155	803.331	823.679	597.621	626.278	647.684	8.46639e-06	-0.391592	1.29831e-06	-8.68153	0.762288	5.0723
RPE	876.722	841.982	857.593	842.461	847.057	1044.79	1106.67	1123.68	7.90687e-06	0.355441	1.18695e-06	8.75422	1.27938	5.102
PDZD2	400.589	387.124	374.99	392.048	360.9	266.383	279.131	263.022	1.04476e-05	-0.507855	1.6818e-06	-8.47425	0.703267	4.98098
CEBPZOS	540.552	544.343	527.971	496.871	540.026	737.584	691.537	697.819	8.65608e-06	0.419354	1.33457e-06	8.65929	1.33733	5.06268
ITFG1	1192.5	1180.84	1142.78	1282.23	1241.65	1590.94	1538.74	1586.25	7.55685e-06	0.381028	1.12e-06	8.80153	1.30227	5.12166
GPI	6718.59	6748.54	6602.15	6643.32	6419.2	8490.85	8206	8293.65	7.80664e-06	0.330149	1.16673e-06	8.76821	1.25714	5.10754
ZMIZ2	1467.36	1543.37	1321.4	1529.95	1504.04	2256.29	2247.84	1939.9	7.47374e-06	0.542785	1.10458e-06	8.81285	1.45678	5.12646
GPN3	599.813	550.304	561.526	548.002	600.282	345.791	388.131	419.719	9.60263e-06	-0.577264	1.51235e-06	-8.55886	0.670234	5.01761
SNIP1	571.19	572.054	552.653	568.083	578.004	378.255	436.09	418.17	9.51015e-06	-0.471227	1.49384e-06	-8.56871	0.721351	5.02181
EPM2A	141.021	135.341	129.265	131.48	140.976	228.181	219.922	193.906	1.23868e-05	0.654501	2.07754e-06	8.30769	1.57407	4.90704
DBNDD1	787.864	798.675	845.742	763.475	780.648	619.167	559.495	556.427	8.7812e-06	-0.460196	1.35885e-06	-8.64476	0.726887	5.05645
TRMT6	1079.02	956.774	1034.26	942.073	998.526	742.502	724.927	731.857	8.3609e-06	-0.449805	1.27666e-06	-8.69513	0.732142	5.07775
CPEB3	115.467	114.73	110.526	123.921	128.284	60.4474	72.8673	54.0294	1.54645e-05	-0.934858	2.73808e-06	-8.09366	0.523094	4.81066
SNCA	414.883	412.235	402.629	382.501	395.402	569.227	518.263	562.97	9.51815e-06	0.454765	1.49589e-06	8.56762	1.37056	5.02145
HMGN2	1493.88	1434.82	1465.52	1317.84	1400.12	1857.85	1992.19	2211.86	7.6627e-06	0.504147	1.13886e-06	8.7879	1.41828	5.11562
PPA1	1652.31	1557.03	1746.77	1555.81	1652.78	1159.81	1217.45	1266.77	7.83633e-06	-0.426603	1.17246e-06	-8.76421	0.744012	5.10589
SSBP1	1466.34	1608.12	1677.7	1525.61	1560.84	1104.14	1154.91	1208.88	7.88237e-06	-0.438696	1.18262e-06	-8.7572	0.737801	5.10334
PPP1R9A	96.064	92.1942	104.613	101.312	105.831	48.9427	59.5756	56.056	1.60745e-05	-0.875834	2.88073e-06	-8.05472	0.544939	4.79386
LONRF1	253.414	264.912	270.414	243.276	230.368	152.068	153.872	169.435	1.25168e-05	-0.671991	2.10722e-06	-8.2966	0.62764	4.90251
CSRP1	4691.18	4871.99	4807.09	4707.88	4621.66	3682.85	3663.56	3912.9	7.74677e-06	-0.337297	1.15551e-06	-8.77607	0.791523	5.11088
MDGA1	375.048	401.857	341.428	381.637	404.893	545.486	528.909	550.904	9.7083e-06	0.510895	1.53507e-06	8.54695	1.42493	5.01286
PRPF19	2418.66	2427.73	2323.1	2467.79	2573.19	1938.37	1892.7	1926.24	7.71632e-06	-0.346765	1.14829e-06	-8.78118	0.786346	5.11259
PYROXD1	349.435	328.788	312.842	318.7	334.662	231.801	229.453	215.02	1.15235e-05	-0.543721	1.90085e-06	-8.37746	0.685999	4.93841
DYNC2H1	248.309	198.143	208.207	273.696	251.948	412.983	382.307	404.601	1.09106e-05	0.770228	1.77443e-06	8.43177	1.70554	4.96215
TM9SF4	2208.17	2142.9	2058.61	2344.8	2132.65	2946.72	2784.07	2861.27	7.74677e-06	0.396351	1.15585e-06	8.77583	1.31617	5.11088
SLC9A3-AS1	252.429	259.462	215.102	233.478	246.544	601.379	527.534	388.865	1.05599e-05	1.04674	1.70596e-06	8.46293	2.06585	4.97634
DENND1A	673.418	654.559	669.081	631.821	660.232	823.248	852.542	863.51	8.78006e-06	0.36441	1.35587e-06	8.64653	1.28735	5.0565
UGCG	1186.36	1191.28	1134.89	1162.72	1197.84	888.106	934.523	939.942	8.35524e-06	-0.351415	1.27503e-06	-8.69616	0.783815	5.07804
ATP11A	833.805	796.253	844.768	879.824	791.997	1065.09	1103.61	1081.26	8.3831e-06	0.386503	1.28415e-06	8.6904	1.30722	5.0766
CALM1	4881.28	4735.3	4737.97	4467.66	4467.36	5868.42	6053.32	6231.81	8.05648e-06	0.377923	1.21352e-06	8.73624	1.29947	5.09385
HHLA3	79.7489	98.2378	72.0065	86.3619	100.53	161.462	181.556	151.069	1.42646e-05	0.922257	2.47062e-06	8.17289	1.89508	4.84574
KITLG	359.71	392.463	387.833	385.221	386.038	496.172	557.301	562.343	9.89905e-06	0.492523	1.57365e-06	8.52714	1.4069	5.00441
SUZ12	1973.14	1878.95	1956.97	1809.57	1840.28	2378.66	2478.84	2393.06	7.80059e-06	0.353736	1.16517e-06	8.76929	1.27787	5.10787
ATXN1	732.673	749.586	720.405	757.554	748.937	585.693	559.084	571.75	9.23754e-06	-0.375144	1.44413e-06	-8.59583	0.771028	5.03444
TNFAIP8L3	127.823	136.623	150.951	145.008	124.12	67.8065	73.3571	81.6841	1.55105e-05	-0.879188	2.7488e-06	-8.09066	0.543673	4.80937
THOC6	249.352	263.885	250.651	236.167	266.501	353.942	352.365	376.558	1.10823e-05	0.512348	1.80878e-06	8.41661	1.42637	4.95537
SSU72	1469.37	1496.09	1440.84	1495.48	1447.43	1950.2	1784.96	1862.08	7.94459e-06	0.343369	1.19327e-06	8.74991	1.26872	5.09993
LRRN1	153.302	103.92	145.055	123.51	119.175	57.923	56.981	54.8001	1.6325e-05	-1.18156	2.94322e-06	-8.03831	0.440874	4.78715
AP3S2	189.031	174.203	155.908	189.662	177.974	265.847	268.026	277.354	1.2204e-05	0.611604	2.04141e-06	8.32143	1.52796	4.9135
VCPIP1	991.184	1032.65	1032.27	993.961	1048.32	759.503	820.624	778.425	8.70073e-06	-0.376187	1.34218e-06	-8.65471	0.770471	5.06044
PRKCA	1104.61	1032.52	1042.13	1053.64	992.218	1335.68	1325.17	1393.81	8.22936e-06	0.371759	1.25105e-06	8.71154	1.29393	5.08463
PCED1A	454.741	457.928	399.655	435.314	481.474	688.889	651.262	610.616	9.63084e-06	0.545583	1.51793e-06	8.55592	1.45961	5.01634
CCNG1	1701.36	1551.81	1672.74	1437.92	1555.49	2145.32	2139.32	2267.33	7.9607e-06	0.465448	1.19635e-06	8.74781	1.38075	5.09905
SECTM1	175.788	167.099	129.236	204.285	177.801	482.194	329.017	355.237	1.17683e-05	1.18322	1.95299e-06	8.35618	2.27083	4.92929
KCTD2	1450.02	1388.67	1530.63	1358.25	1410.94	1004.4	1074.05	1106.01	8.30179e-06	-0.42793	1.26619e-06	-8.7018	0.743327	5.08083
TSR1	1307.92	1302.78	1480.34	1406.37	1398.52	955.595	1036.53	1032.59	8.3609e-06	-0.451013	1.27728e-06	-8.69474	0.731529	5.07775
TBC1D22B	461.852	478.945	471.738	454.65	490.372	354.957	326.427	345.229	1.0624e-05	-0.461961	1.71901e-06	-8.45689	0.725999	4.97371
BOD1	987.082	1018.06	937.525	961.952	906.311	1262.43	1234.55	1257.07	8.37335e-06	0.380587	1.28033e-06	8.69281	1.30187	5.0771
SF3B5	2174.49	2298.93	2194.79	2166.16	2274.43	1688.26	1722.65	1822.15	8.0436e-06	-0.349171	1.21081e-06	-8.73805	0.785035	5.09455
BRD9	991.141	978.49	970.113	968.194	981.416	765.626	795.971	742.31	8.90068e-06	-0.349354	1.38262e-06	-8.6308	0.784936	5.05058
TMX1	1424.43	1322.39	1364.84	1456.36	1445.59	1767.78	1801.08	1840.56	8.13315e-06	0.362951	1.22972e-06	8.72548	1.28605	5.08974
CLDN11	486.348	459.986	461.871	425.176	451.616	681.373	646.539	599.896	9.78286e-06	0.490998	1.55047e-06	8.53898	1.40542	5.00953
PLBD2	1478.61	1627.03	1356.93	1688.44	1520.31	2262.45	2231.63	2146.01	8.08602e-06	0.532478	1.22158e-06	8.73086	1.44641	5.09227
OGFRL1	1205.72	1163.11	1184.27	1324.3	1225.73	851.29	898.729	937.052	8.65608e-06	-0.445623	1.33412e-06	-8.65957	0.734267	5.06268
ARHGAP18	449.583	404.59	455.949	418.23	405.888	593.455	574.646	595.659	9.97904e-06	0.463699	1.59148e-06	8.51815	1.37907	5.00091
VPS53	1178.18	1251.8	1224.71	1223.45	1165.18	886.042	974.975	902.253	8.64462e-06	-0.392563	1.33138e-06	-8.66123	0.761775	5.06325
COA6	547.713	516.614	548.697	495.968	545.151	342.235	357.687	397.502	1.05599e-05	-0.538154	1.70598e-06	-8.46292	0.688652	4.97634
PLA2G15	741.862	743.56	755.938	701.189	773.069	971.107	977.104	1101.2	8.83667e-06	0.450265	1.37028e-06	8.63802	1.36629	5.05371
MYBL2	3158.45	3239.65	3273.48	2820.95	2976.41	2295.86	2235.61	2315.24	8.06307e-06	-0.43674	1.21641e-06	-8.7343	0.738802	5.0935
MOB1B	1098.47	1099.05	1116.15	1175.04	1079.21	818.13	888.563	848.469	8.7812e-06	-0.387338	1.35781e-06	-8.64538	0.764539	5.05645
RBBP9	386.252	366.575	371.058	373.135	373.174	494.956	487.039	529.428	1.04337e-05	0.4284	1.67783e-06	8.47613	1.34574	4.98156
EFHD2	1447.93	1502.89	1428	1446.85	1406.87	1872.48	1812.4	1768.6	8.20536e-06	0.329529	1.24468e-06	8.71567	1.2566	5.0859
P4HA3	127.767	114.4	102.594	198.562	134.81	318.883	323.367	275.746	1.2926e-05	1.20949	2.19112e-06	8.26612	2.31256	4.88854
CEBPB	1084.2	1132.49	1005.59	1453.84	1404.34	2335.72	2147.3	2181.98	8.25437e-06	0.883632	1.25759e-06	8.70731	1.84501	5.08332
PHKA2	382.177	366.522	381.915	386.128	374.857	254.366	280.728	275.382	1.16335e-05	-0.48766	1.92284e-06	-8.36841	0.713181	4.93429
GSTM2	177.84	169.645	187.486	153.754	163.054	285.339	252.348	260.346	1.28086e-05	0.645951	2.16378e-06	8.27591	1.56477	4.8925
NADK	844.034	878.258	862.527	882.337	882.357	1061.98	1143.05	1139.86	8.7812e-06	0.357807	1.35768e-06	8.64546	1.28148	5.05645
BEND7	271.787	304.835	293.124	285.063	282.256	192.516	180.58	202.848	1.28261e-05	-0.58247	2.17099e-06	-8.27331	0.667819	4.89191
ZFAND2A	414.859	438.349	446.079	462.55	469.754	325.574	311.94	295.282	1.12405e-05	-0.522023	1.83925e-06	-8.40342	0.696395	4.94922
LMBR1L	618.233	690.133	624.678	669.26	722.421	433.828	478.577	401.309	1.02418e-05	-0.604281	1.64103e-06	-8.49375	0.657799	4.98963
ZC3H8	220.674	228.065	204.297	198.389	197.898	139.571	117.029	116.065	1.44073e-05	-0.758381	2.49976e-06	-8.16382	0.59116	4.84142
EMD	732.682	827.292	756.92	834.676	851.379	566.243	564.284	563.22	9.6961e-06	-0.502282	1.53189e-06	-8.5486	0.705989	5.0134
SMIM29	235.045	245.756	261.516	303.204	279.534	405.501	401.421	417.027	1.14302e-05	0.627734	1.87882e-06	8.38664	1.54514	4.94195
HADH	568.166	506.974	537.824	504.509	498.469	749.888	685.542	760.842	9.78146e-06	0.484821	1.54943e-06	8.53951	1.39941	5.0096
KHDRBS3	405.675	441.765	467.793	419.947	411.038	301.052	296.589	272.276	1.15514e-05	-0.565408	1.9064e-06	-8.37516	0.675764	4.93737
TM2D3	308.607	287.103	288.15	322.926	328.489	422.699	451.764	486.727	1.11477e-05	0.563572	1.82129e-06	8.41117	1.47792	4.95282
CTSD	3843.15	4227.02	4013.59	4145.47	3774.9	5678.04	5139.62	5318.72	8.51199e-06	0.426976	1.30742e-06	8.67588	1.34441	5.06997
GPATCH11	333.131	335.513	349.353	309.83	311.154	222.181	227.812	222.535	1.25141e-05	-0.548025	2.10573e-06	-8.29715	0.683956	4.9026
XYLT2	877.779	891.012	852.639	890.813	960.514	1263.7	1150.29	1173.29	8.91385e-06	0.418536	1.38614e-06	8.62876	1.33657	5.04993
GNE	750.022	690.053	639.475	649.219	679.244	923.22	915.062	979.347	9.38852e-06	0.464558	1.47085e-06	8.58114	1.37989	5.0274
C1orf226	86.8867	88.6868	88.8052	88.1687	100.593	48.924	54.8268	47.4367	1.79718e-05	-0.84431	3.30417e-06	-7.95022	0.556977	4.74541
BLVRB	656.052	770.346	681.914	686.465	692.11	455.179	445.259	515.885	1.03548e-05	-0.562981	1.66172e-06	-8.48379	0.676902	4.98486
FLT4	223.833	230.048	220.045	193.56	218.973	129.545	130.348	142.495	1.45042e-05	-0.693418	2.52598e-06	-8.15576	0.618387	4.83851
ZDHHC23	279.98	273.456	293.11	249.254	295.065	187.987	161.045	169.232	1.35638e-05	-0.688849	2.31948e-06	-8.22181	0.620349	4.86762
UTRN	1349.82	1220.68	1306.63	1211.29	1289.12	968.412	977.569	970.631	8.97667e-06	-0.390586	1.3974e-06	-8.62225	0.76282	5.04688
FARSA	1958.86	2232.76	2157.31	2128.29	2049.26	1639.97	1462.19	1551.14	8.5537e-06	-0.440809	1.31454e-06	-8.6715	0.736721	5.06785
CREBRF	611.074	620.177	607.903	630.276	660.439	481.981	466.743	459.139	1.05599e-05	-0.415913	1.70206e-06	-8.46475	0.749545	4.97634
LHPP	134.926	150.796	115.426	144.39	128.672	274.012	213.072	238.386	1.40056e-05	0.839856	2.4136e-06	8.19096	1.78987	4.8537
SNAPIN	489.47	470.033	472.7	466.557	453.021	629.905	598.127	644.393	1.04187e-05	0.407824	1.67282e-06	8.4785	1.32668	4.98219
ITPR1	390.355	345.704	318.73	424.267	403.255	573.849	664.291	603.295	1.06944e-05	0.710039	1.73271e-06	8.4506	1.63585	4.97084
ZNF550	238.086	229.436	237.838	239.871	246.01	168.044	162.656	147.738	1.41939e-05	-0.583142	2.45547e-06	-8.17765	0.667508	4.8479
PHF6	1227.21	1122.31	1224.71	1084.81	1083.44	1526.3	1554.66	1553.47	8.81046e-06	0.429875	1.36495e-06	8.64116	1.34712	5.055
NUP153	1630.82	1655.64	1570.12	1690.3	1661.58	1337.01	1277.92	1286.96	8.7812e-06	-0.336284	1.35969e-06	-8.64427	0.792079	5.05645
FAF1	1260.92	1168.07	1269.13	1100.41	1135.1	863.179	836.182	870.534	9.42435e-06	-0.46835	1.47959e-06	-8.57639	0.722791	5.02575
ATP8B2	1237.45	1170.55	1100.34	1380.25	1249.47	1733.82	1724.23	1814.2	8.86882e-06	0.521192	1.3762e-06	8.63455	1.43514	5.05213
FAM210A	1092.22	927.778	1028.38	853.956	849.87	548.572	583.154	586.455	1.01677e-05	-0.724349	1.62747e-06	-8.50035	0.60527	4.99278
RAB11FIP5	1482.67	1513.21	1502.02	1632.28	1559.2	1170.15	1222.47	1190.44	9.03371e-06	-0.364026	1.40702e-06	-8.61673	0.776993	5.04413
TGOLN2	2765.05	2506.13	2508.63	3103.51	2657.34	3836.97	3983.25	4035.87	8.7812e-06	0.549628	1.35959e-06	8.64432	1.46371	5.05645
DMTN	168.652	200.009	178.604	175.536	179.503	116.865	98.7261	87.2453	1.61322e-05	-0.847342	2.89641e-06	-8.05057	0.555808	4.79231
SNX19	2089.63	2003.22	1997.43	2169.1	2028.7	2594.14	2563.29	2736.05	8.75092e-06	0.354605	1.35065e-06	8.64964	1.27864	5.05795
CHORDC1	1199.61	1312.41	1269.14	1125.63	1158.43	834.623	910.403	846.678	9.56417e-06	-0.488315	1.50471e-06	-8.56292	0.712857	5.01935
MMD	795.055	727.616	748.993	828.24	793.307	1007.18	1116.55	1055.99	9.63084e-06	0.44499	1.51839e-06	8.55568	1.36131	5.01634
MRPS31	424.055	428.808	435.219	393.045	407.611	288.136	305.264	300.075	1.22992e-05	-0.486674	2.05938e-06	-8.31457	0.713668	4.91012
CD83	247.285	257.115	239.804	247.616	263.212	345.763	345.607	348.718	1.26331e-05	0.465175	2.1289e-06	8.2886	1.38048	4.89849
SEMA3F	1396.89	1311.83	1235.53	1837.39	1617.47	2616.78	2714.52	2697.69	8.91385e-06	0.869896	1.38542e-06	8.62918	1.82753	5.04993
GAK	1926.16	2042.03	1929.33	1984.52	1949.5	1587.79	1584.5	1586.04	8.9439e-06	-0.309349	1.39155e-06	-8.62562	0.807006	5.04847
TSPAN15	120.589	128.525	129.279	101.924	101.213	199.518	188.765	206.95	1.53187e-05	0.78127	2.70845e-06	8.10202	1.71864	4.81478
PACSIN2	1129.12	1129.3	1204	1096.16	1110.22	1433.34	1424.59	1480.53	9.27784e-06	0.351125	1.45197e-06	8.59149	1.27556	5.03255
PIGM	785.768	766.153	746.078	801.915	769.747	992.286	972.888	978.329	9.86295e-06	0.342693	1.56643e-06	8.5308	1.26812	5.00599
GPANK1	540.546	591.087	558.576	600.205	578.871	429.273	373.744	411.551	1.15097e-05	-0.504475	1.89761e-06	-8.3788	0.704917	4.93894
NOM1	585.499	610.047	575.351	607.081	602.081	448.58	461.858	449.382	1.12922e-05	-0.396013	1.84864e-06	-8.3994	0.759956	4.94722
NUP210	515.008	512.4	510.21	555.96	515.091	371.818	345.252	395.921	1.17924e-05	-0.494981	1.95888e-06	-8.35381	0.709571	4.9284
TRIM69	788.848	727.168	668.094	890.286	767.064	1176.54	1145.55	1151.91	9.78146e-06	0.598095	1.5489e-06	8.53978	1.51372	5.0096
HSD11B1L	84.8856	86.6824	80.8785	95.7475	84.6735	165.565	132.321	153.443	1.67181e-05	0.796224	3.03072e-06	8.01594	1.73655	4.77681
CAMSAP2	1651.27	1645.24	1634.27	1599.26	1572.02	1326.91	1299.65	1285.07	9.27784e-06	-0.313064	1.45149e-06	-8.59176	0.804931	5.03255
HLA-E	7933.53	7929.68	7945.29	8661.81	8486.77	10654	10572.3	10739.7	9.80383e-06	0.38048	1.5546e-06	8.53685	1.30177	5.0086
ULBP2	576.315	655.818	689.849	633.926	625.296	449.935	436.558	444.448	1.13847e-05	-0.517531	1.86721e-06	-8.39152	0.698566	4.94368
CD164	6803.36	6653.86	6812.38	6672.11	6463.28	8229.66	8342.05	8602.41	9.6961e-06	0.328876	1.53177e-06	8.54867	1.25603	5.0134
CDK5R1	137.961	160.565	142.107	141.968	177.423	65.9941	83.2217	82.9605	1.79145e-05	-0.983153	3.28834e-06	-7.95387	0.505873	4.7468
NOP9	842.006	842.75	823.041	900.482	860.752	591.94	635.613	668.802	1.05599e-05	-0.43431	1.70582e-06	-8.463	0.740047	4.97634
ARID4A	867.536	822.072	895.099	813.825	802.243	632.894	604.604	635.871	1.05878e-05	-0.426922	1.71226e-06	-8.46001	0.743847	4.9752
CAMK2D	640.73	689.104	646.378	661.289	694.668	856.214	857.782	918.789	1.03306e-05	0.396857	1.65698e-06	8.48606	1.31664	4.98587
KCTD17	859.352	815.215	832.919	864.161	849.662	1049.87	1067.65	1133.39	9.89905e-06	0.359752	1.5738e-06	8.52706	1.28321	5.00441
SKP2	689.693	615.183	572.383	565.36	557.195	833.717	927.645	909.827	1.04436e-05	0.572658	1.68029e-06	8.47496	1.48726	4.98115
ARHGAP26	289.186	300.218	260.52	328.299	306.186	174.179	190.87	179.969	1.45472e-05	-0.704991	2.53708e-06	-8.15237	0.613446	4.83722
MED13	2464.63	2312.09	2372.45	2446.17	2416.61	1870.41	1953.54	1949.11	9.21523e-06	-0.319951	1.43988e-06	-8.5982	0.801097	5.03549
IL6R	417.933	435.682	467.788	444.224	391.162	586.048	642.935	611.088	1.14187e-05	0.509349	1.87409e-06	8.38863	1.42341	4.94238
LDHA	18213.2	16328.6	19447.3	16124.1	15539.7	25530	25507.8	27329.4	1.08947e-05	0.613097	1.77036e-06	8.43358	1.52954	4.96279
ELOVL6	872.645	833.287	839.822	776.511	735.901	1102.77	1146.21	1094.58	1.00065e-05	0.460343	1.59918e-06	8.51431	1.37587	4.99972
ABCC4	828.704	775.478	732.244	836.423	797.991	1113.07	1055.76	1035.97	1.00783e-05	0.428828	1.6115e-06	8.5082	1.34614	4.99661
ACSL1	1297.76	1208.35	1361.87	1276.93	1206.24	906.459	904.441	988.121	9.93796e-06	-0.444598	1.58246e-06	-8.52268	0.734789	5.0027
LONRF3	163.511	163.808	186.527	166.179	155.505	97.6264	96.3364	107.597	1.72721e-05	-0.733657	3.14831e-06	-7.98693	0.601378	4.76266
GMEB1	472.098	489.982	533.908	543.015	518.615	333.111	374.552	340.016	1.23868e-05	-0.55078	2.07815e-06	-8.30746	0.682651	4.90704
CDKN2D	382.18	356.125	350.325	334.008	379.161	239.25	246.172	252.429	1.36808e-05	-0.548875	2.34855e-06	-8.21214	0.683553	4.86389
CA13	161.431	167.53	176.674	169.025	176.548	108.778	104.032	113.526	1.70945e-05	-0.644779	3.11053e-06	-7.99612	0.639591	4.76714
ZNF83	441.424	402.795	377.957	398.196	398.062	604.041	597.012	533.089	1.17392e-05	0.51737	1.94526e-06	8.35929	1.43134	4.93036
EPAS1	2081.49	2103.96	1878.98	2512.77	2244.41	3232.15	3394.89	3342.42	9.4152e-06	0.625206	1.47659e-06	8.57802	1.54243	5.02617
GPRIN1	499.684	557.385	562.526	563.762	535.781	732.036	712.357	745.165	1.10972e-05	0.425125	1.81213e-06	8.41515	1.34269	4.95479
[truncated: 10,065 more rows]
