# Supplementary material for: UL34 Deletion Restricts Human Cytomegalovirus Capsid Formation and Maturation
Source: Int J Mol Sci. 2022 May 21;23(10):5773. doi: 10.3390/ijms23105773 (PMC9143689; doi:10.3390/ijms23105773)
Supplement: Supplementary file 1 [file ijms-23-05773-s001.zip › Supplementary File S2.xlsx]

## Sheet: Primer sequences
	Primer sequences
	Name	Forward (5' => 3')	Reverse (5' => 3')
	pBMN_UL54	tagactgccggatccccaccATGTTTTTCAACCCGTATCTGAG	acacattccacagggtcgacTCAACAGCATTCGTGCGC
	pBMN_HA-UL34	gatctcgagctcaagctttaAACTTCATCATCACCACCC	tatctagatccggtggatccTTAAATACACAACGGGGTTATG
	AD169 HA-UL34	TCCGCGGCCCCCACGGCGGCGGCCTGCTCGCACGGACCTATACTATTACCGCCCCACCGCCGTCGTCGTCATGtacccatacgatgttccagatt	CCGTGACTTGCTGGATCTC
	AD169 HA-UL34 sequencing	GTCCGGCGCAACTTCTGTCT	CCGTGACTTGCTGGATCTC
	pBMN sequencing	ACTAACAGCCCCTCTCTC	AGGTGGGGTCTTTCATTCC
	ATG5 qPCR	TATTACCCTTTGATGCCTTTTTTTC	AACTTGTACCACCAATTCTAAAATG
	UL51 qPCR	ACGACGGAGAGGAGGAAA	GCATCGGCTCGAACTGTAATA
	UL52 qPCR	CGGAACTCACGCACACTAA	GGGTACGGGACATAGGTAAATG
	UL55 (gB) qPCR	CCGAACTACACCATCGTTTCCG	ATAGTACGTTCCGAGGCTTCCC
	UL56 qPCR	CTGACCATCATCCCGAATCAG	GGCCGATGAAGAAGAGAATAGG
	UL83 qPCR	GTCAGCGTTCGTGTTTCCCA	GGGACACAACACCGTAAAGC
	UL86 (MCP) qPCR	CCGATAGCATCCTAGACAACCC	CAGGATCGAGTGATAGGATATGGC
	UL89 qPCR	TCAACTCGGGCTACATCAAAG	CATGATGACGGCGATGATAAGA
	UL93 qPCR	CCACTGGAGTTGCTCGATTAC	GTAACAGGTCACGCGCTAAA
	UL104 qPCR	TTGCTGCACGGCTTTCT	ATACTGCTCCAGGTCCTCTT
	US3 qPCR	GTGGGTATCGTCTCTCAATCTTAC	CACACGCGGCATATTTCTTG
	US9 qPCR	GTCCACCTGTTCCTTCTTCTG	GACGGACGGACTTGCTATTT
	US11 qPCR	TACTGGCTCCGGGACTATC	CGTATACTGCGCCGACTTAAT
